# Supplementary material for: Genetic Analysis of Pathways Regulated by the von Hippel-Lindau Tumor Suppressor in Caenorhabditis elegans
Source: PLoS Biol. 2004 Sep 7;2(10):e289. doi: 10.1371/journal.pbio.0020289 (PMC515368; doi:10.1371/journal.pbio.0020289)
Supplement: Table S1 — Primary microarray data for the vhl-1 (green, channel 1) versus wild-type (red, channel 2) comparison. (6.5 MB XLS). [file pbio.0020289.st001.xls]

## Sheet: CePJRS~F1.xls
Spot	Description	Chromosome	Gene name	Orfname	Name	Ch1 Intensity (Mean)	Ch1 Background (Median)	Ch1 Net (Mean)	Ch2 Intensity (Mean)	Ch2 Background (Median)	Ch2 Net (Mean)	Ch2 Normalized Intensity (Mean)	Ch2 Normalized Background (Median)	Ch2 Normalized Net (Mean)	Spot Flag	Green/Red Normalized (Mean)	Log(base2) of Green/Red Normalized Ratio (Mean)
1	Member of the M1 peptidase family of aminopeptidases, has weak similarity to leucine aminopeptidase (oxytocinase, human LNPEP), which is an insulin-regulated zinc aminopeptidase that degrades oxytocin and vasopressin	5	AC3.5	AC3.5	AC3.5	4596	125	4471	3454	180	3274	4161	216	3945	0	1.133	0.180148
2	Protein containing a UDP-glucoronosyl and UDP-glucosyl transferase domain, which transfer glycosyl groups to small hydrophobic molecules, has weak similarity to UDP glycosyltransferase 1 family polypeptide A6 (mouse Ugt1a6)	5	AC3.8	AC3.8	AC3.8	1333	154	1179	1394	177	1217	1679	213	1466	0	0.804	-0.314733
3	Member of the 7TM receptor protein family	2	sra-2/AH6.6	AH6.6	AH6.6	191	140	51	157	156	1	189	187	2	0	25.5	4.67243
4	Protein with moderate similarity to C. elegans B0001.5 gene product	4	B0001.3	B0001.3	B0001.3	1779	141	1638	927	135	792	1116	162	954	0	1.717	0.77989
5	Protein containing two collagen triple helix repeats, which are found in some extracellular proteins, and a nematode cuticle collagen N-terminal domain, has moderate similarity to a region of C. elegans BLI-1	5	B0024.1	B0024.1	B0024.1	1411	152	1259	1384	122	1262	1667	146	1521	0	0.828	-0.272297
6	Protein of unknown function, has moderate similarity to uncharacterized C. elegans ZK6.10	5	B0024.4	B0024.4	B0024.4	341	143	198	328	109	219	395	131	264	0	0.75	-0.415037
7	Protein containing an F-box domain, which serve as a link between a target protein and a ubiquitin-conjugating enzyme, and a DUF38 domain of unknown function, has weak similarity to C. elegans FOG-2, which is required for the sexual identity of germ cells	5	C06H5.1	C06H5.1	C06H5.1	1717	130	1587	2116	111	2005	2549	133	2416	0	0.657	-0.606035
8	Protein containing an EF hand domain, which are found in signaling, buffering or transport proteins, has weak similarity to a region of alpha actinin 2 (mouse Actn2), which may play a role in muscle cell fusion	3	C07A9.5	C07A9.5	C07A9.5	469	149	320	459	144	315	553	173	380	0	0.842	-0.248108
9	Protein containing three chitin binding peritrophin-A domains, which contain six conserved cysteines that probably form three disulfide bridges	3	cej-1/C07G2.1	C07G2.1	C07G2.1	6891	154	6737	4220	152	4068	5084	183	4901	0	1.375	0.459432
10	Member of the plant chitinase class I family, which hydrolyze the beta-1,4-N-acetyl-D-glucosamine bonds in chitin polymers destroying chitin-containing cell walls of pathogens, has strong similarity to uncharacterized C. elegans R10D12.15	5	C08B6.4	C08B6.4	C08B6.4	2014	180	1834	717	157	560	863	189	674	0	2.721	1.44414
11	Protein containing 14 KH domains, which may bind RNA, has moderate similarity to high density lipoprotein binding protein (human HDLBP), which binds high density lipoproteins, mRNA and tRNA, and is involved in mRNA stability	2	C08H9.2	C08H9.2	C08H9.2	2888	188	2700	1414	130	1284	1703	156	1547	0	1.745	0.803227
12	Member of the glycosyl hydrolase 18 family, has a region of weak similarity to a region of chitinase 1 (chitotriosidase, human CHIT1), which catalyzes the hydrolysis of chitin and is elevated in patients with Gaucher disease	2	C08H9.7	C08H9.7	C08H9.7	570	176	394	654	130	524	787	156	631	0	0.624	-0.680382
13	Protein of unknown function	5	F53C11.4	F53C11.4	F53C11.4	2726	157	2569	1390	148	1242	1674	178	1496	0	1.717	0.77989
14	Member of the 7-transmembrane chemoreceptor family of G protein-coupled receptors (GPCR), has strong similarity to uncharacterized C. elegans Y38A10A.1	5	F53F1.11	F53F1.11	F53F1.11	275	139	136	195	172	23	234	207	27	0	5.037	2.33256
15	Member of the glycosyl hydrolases family 31, which are involved in carbohydrate metabolism, contains a P-type trefoil domain, has low similarity to lysosomal acid alpha-glucosidase (human GAA), which acts in glycogen catabolism	5	F53F4.8	F53F4.8	F53F4.8	343	125	218	249	208	41	300	250	50	0	4.36	2.12433
16	Protein containing two SNF2 related N-terminal domains and a helicase conserved C-terminal domain, has a region of low similarity to a region of Cockayne's syndrome complementation group B (human ERCC6), which is a transcription-coupled DNA repair protein	X	F53H4.1	F53H4.1	F53H4.1	451	120	331	320	224	96	385	269	116	0	2.853	1.51248
17	Member of the ATPase family associated with various cellular activities, has weak similarity to S. cerevisiae Rpt5p, which is an ATPase component of 26S proteasome complex that functions in RNA polymerase II transcription elongation	2	F54B3.3	F54B3.3	F54B3.3	3235	124	3111	2247	228	2019	2707	274	2433	0	1.279	0.355016
18	Protein with strong similarity to C. elegans T23B12.10 gene product	X	F54B11.7	F54B11.7	F54B11.7	393	123	270	333	231	102	401	278	123	0	2.195	1.13422
19	Protein containing five PDZ, DHR, or GLGF domains, which are found in signaling proteins, and two WW domains, has low similarity to activin receptor-interacting protein 1 (mouse Acvrip1), which inhibits activin-induced transcriptional activity	4	K01A6.1	K01A6.1	K01A6.1	1096	114	982	760	225	535	915	271	644	0	1.525	0.608809
20	Protein containing two pyridoxal-dependent group II decarboxylase conserved domains, which bind pyridoxal-phosphate groups, has a region of high similarity to dopa decarboxylase (aromatic L-amino acid decarboxylase, mouse Ddc)	2	K01C8.3	K01C8.3	K01C8.3	2179	118	2061	1230	237	993	1481	285	1196	0	1.723	0.784923
21	Member of the mitochondrial carrier protein family of membrane transporters, has moderate similarity to human LOC81034, which is a mitochondrial folate transporter that facilitates the transport of folates from the cytosol into the mitochondrial matrix	2	K01C8.7	K01C8.7	K01C8.7	584	116	468	664	245	419	800	295	505	0	0.927	-0.109359
22		3		multiple	K01G5.1	1318	121	1197	1055	255	800	1271	307	964	0	1.242	0.312665
23	Member of the reverse transcriptase protein family, which are RNA-dependent DNA polymerases, has high similarity to uncharacterized C. elegans T19C9.7	4	R05A10.1	R05A10.1	K01G12.1	341	125	216	352	262	90	424	315	109	0	1.982	0.986957
24	Protein of unknown function	X	K02B9.3	K02B9.3	K02B9.3	271	123	148	261	264	-3	314	318	-4	0
25	Protein with high similarity to threonyl-tRNA synthetase (human TARS), which is a class II aminoacyl tRNA synthetase, contains anticodon binding, tRNA synthetase class II core and TGS (ThrRS, GTPase and SpoT) domains	2	C47D12.6	C47D12.6	C47D12.6	1287	131	1156	912	268	644	1098	322	776	0	1.49	0.575312
26	Protein with high similarity to solute carrier family 25 member 4 (mouse Slc25a4), which is an adenine nucleotide translocator required for metabolism that can induce apoptosis, member of the mitochondrial carrier protein family of membrane transporters	4	C47E12.2	C47E12.2	C47E12.2	1109	138	971	1225	272	953	1475	327	1148	0	0.846	-0.24127
27	Protein with high similarity to S. cerevisiae Ipp1p, which is a cytoplasmic inorganic pyrophosphatase, member of the inorganic pyrophosphatase family, which catalyze hydrolysis of pyrophosphate formed as product of biosynthetic reactions utilizing ATP	4	C47E12.4	C47E12.4	C47E12.4	3141	132	3009	1857	141	1716	2237	169	2068	0	1.455	0.541019
28	Protein of unknown function, has weak similarity to uncharacterized C. elegans E04D5.2	5	C47E8.3	C47E8.3	C47E8.3	1023	161	862	630	182	448	759	219	540	0	1.596	0.674461
29		5		multiple	C47E8.6	428	145	283	418	178	240	503	214	289	0	0.979	-0.0306192
30	Member of the galactosyltransferase family, which transfer galactose to GlcNAc termini of growing oligosaccharide chains, has low similarity to UDP-galactose:beta-N-acetylglucosamine beta 1,3-galactosyltransferase (mouse B3galt1)	1	C47F8.3	C47F8.3	C47F8.3	176	126	50	143	163	-20	172	196	-24	0
31	Protein of unknown function, has low similarity to uncharacterized C. elegans K06B9.4	5	C54E10.1	C54E10.1	C54E10.1	184	111	73	140	121	19	168	145	23	0	3.174	1.6663
32	Protein with weak similarity to S. cerevisiae Paf1p (protein associated with RNA polymerase II), has similarity to human HS.152894	5	C55A6.9	C55A6.9	C55A6.9	206	101	105	231	119	112	278	143	135	0	0.778	-0.362158
33	Putative ortholog of C. elegans D1053.4 gene product	X	C40H5.3	C40H5.3	D1053.4	328	109	219	336	142	194	404	171	233	0	0.94	-0.0892673
34	Protein of unknown function, has moderate similarity to uncharacterized human FLJ14936	5	D1054.14	D1054.14	D1054.14	2446	123	2323	1416	157	1259	1706	189	1517	0	1.531	0.614474
35	Putative ortholog of C. elegans F54H5.5 gene product	1	D1081.5	D1081.5	D1081.5	259	136	123	397	168	229	478	202	276	0	0.446	-1.16488
36	Protein containing an N-terminal dynamin family domain, which bind GTP, has a region of low similarity to a region of S. cerevisiae Mgm1p, which is a peripheral membrane protein that mediates mitochondrial inheritance	2	D2013.5	D2013.5	D2013.5	1793	139	1654	1153	159	994	1389	191	1198	0	1.381	0.465713
37	Member of the acyl-CoA dehydrogenase protein family	2	F54D5.7	F54D5.7	F54D5.7	4314	134	4180	2724	147	2577	3281	177	3104	0	1.347	0.42975
38	Protein containing a C3HC4 type (RING) zinc finger, which may mediate protein-protein interactions, and six NHL repeats, has weak similarity to ring finger protein 22 (tripartite motif 3 protein, human TRIM3), which interacts with myosin V molecular motor	3	F54G8.4	F54G8.4	F54G8.4	859	130	729	492	147	345	592	177	415	0	1.757	0.813114
39	Protein containing a glutathione S-transferase C-terminal domain, which may be involved in conjugation of reduced glutathione to various targets	5	F55A11.6	F55A11.6	F55A11.6	391	124	267	465	163	302	560	196	364	0	0.734	-0.446148
40	Member of the 7-transmembrane chemoreceptor family of G protein-coupled receptors (GPCR), has low similarity to C. elegans ODR-10, which is involved in odorant response	5	F55B12.6	F55B12.6	F55B12.6	247	119	128	238	189	49	286	227	59	0	2.169	1.11703
41	Protein containing a DUF23 domain of unknown function, has high similarity to uncharacterized C. elegans F22F7.4	5	F55C10.4	F55C10.4	F55C10.4	253	119	134	242	213	29	291	256	35	0	3.829	1.93697
42		5		D87850-1.F55C5	F55C5.5	1729	122	1607	1367	223	1144	1646	268	1378	0	1.166	0.221568
43	Acyl-CoA:diacylglycerol acyltransferase	5	H19N07.4/DGAT	H19N07.4	H19N07.4	1369	126	1243	1164	225	939	1402	271	1131	0	1.099	0.136191
44	Protein of unknown function	3	K01B6.3	K01B6.3	K01B6.3	450	126	324	497	229	268	598	275	323	0	1.003	0.00432161
45	Member of the EGF-repeat protein family	2	K01C8.2	K01C8.2	K01C8.2	285	123	162	313	233	80	377	280	97	0	1.67	0.739848
46	Protein containing a nuclear hormone receptor C4-type zinc finger domain, has a region of moderate similarity to a region of nuclear receptor subfamily 5 group A member 2 (rat Nr5a2), which is a transcriptional activator of several liver specific genes	4	nhr-38/K01H12.3	K01H12.3	K01H12.3	261	120	141	355	232	123	427	279	148	0	0.953	-0.0694519
47	Protein of unknown function, has strong similarity to uncharacterized C. elegans W03G1.3	2	K02B7.2	K02B7.2	K02B7.2	412	124	288	510	237	273	614	285	329	0	0.875	-0.192645
48	Protein containing a LIM domain, which may mediate protein-protein interactions, has a region of low similarity to a region of kyphoscoliosis (mouse Ky), which is critical for muscle growth and function and for neuromuscular junction maturation	2	K02C4.4	K02C4.4	K02C4.4	717	127	590	678	244	434	816	293	523	0	1.128	0.173767
49	Member of the M13 peptidase family of zinc metalloproteases, has low similarity to Mel transforming oncogene-like 1 (soluble secreted endopeptidase, mouse Mell1), which is a protease that may be involved in cleavage of intra- and extracellular peptides	5	T16A9.4	T16A9.4	T16A9.4	806	129	677	793	254	539	955	306	649	0	1.043	0.0607392
50	Putative aminopeptidase (SANGER), has strong similarity to H. sapiens ANPEP gene product [aminopeptidase]	3	T16G12.1	T16G12.1	T16G12.1	344	128	216	358	260	98	431	313	118	0	1.831	0.872632
51	PP1-type serine/threonine protein phosphatase	3	T16G12.7	T16G12.7	T16G12.7	300	143	157	358	282	76	431	339	92	0	1.707	0.771463
52	Protein containing a meprin and TRAF homology (MATH) domain, and a BTB (BR-C, ttk and babor) or POZ (Pox virus and zinc finger) domain, has low similarity to C. elegans MEL-26, which is a negative regulator of the meiotic-spindle protein C. elegans MEI-1	3	T16H12.5	T16H12.5	T16H12.5	2919	137	2782	2156	283	1873	2597	340	2257	0	1.233	0.302173
53	Member of the cytochrome P450 family, has moderate similarity to cytochrome P450 4B1 (human CYP4B1), which is a putative risk factor for bladder cancer that is involved in the detoxification response and metabolism of drugs and lipids	5	T19B10.1	T19B10.1	T19B10.1	817	123	694	922	153	769	1110	184	926	0	0.749	-0.416962
54	Member of the glycosyl hydrolases family 35 of beta-galactosidases, has moderate similarity to beta galactosidase 1 (mouse Glb1), which catalyzes cleavage of the terminal galactose from gangliosides, glycoproteins, and glycosaminoglycans	5	T19B10.3	T19B10.3	T19B10.3	1328	146	1182	823	195	628	991	234	757	0	1.561	0.642471
55	Junctophilin; member of the junctophilin family; component of the junctional membrane complexes that mediate physiological coupling between the plasma membrane and intracellular membrane channels found in excitable cells	1	jp/T22C1.7	T22C1.7	T22C1.7	303	152	151	277	203	74	333	244	89	0	1.697	0.762987
56	Protein containing two C2H2 type zinc finger domains, which bind nucleic acids, has moderate similarity to uncharacterized C. elegans T22C8.4	2	T22C8.3	T22C8.3	T22C8.3	215	130	85	283	191	92	340	230	110	0	0.773	-0.37146
57	Protein of unknown function	2	T22C8.8	T22C8.8	T22C8.8	210	116	94	357	183	174	430	220	210	0	0.448	-1.15843
58	Protein containing two DUF33 domains of unknown function, has high similarity to uncharacterized C. elegans F35E2.7	1	T22H2.2	T22H2.2	T22H2.2	158	116	42	231	167	64	278	201	77	0	0.545	-0.875672
59	Member of the 7-transmembrane chemoreceptor family of G-protein coupled receptors (GPCR), has low similarity to C. elegans ODR-10, which is a G protein-coupled receptor involved in odorant response	X	T22H6.4	T22H6.4	T22H6.4	159	119	40	169	175	-6	203	210	-7	0
60	Member of the 7-transmembrane chemoreceptor family of G-protein coupled receptors (GPCR), has very strong similarity to uncharacterized C. elegans T23D5.12	5	T23D5.10	T23D5.10	T23D5.10	207	121	86	180	168	12	216	202	14	0	6.143	2.61894
61	Protein containing three Src homology 3 (SH3) domains, which bind proline-rich peptides, has a region of low similarity to a region of arg binding protein 2 (human ARGBP2), which may act as a cytoskeletal adaptor protein	3	B0303.7	B0303.7	B0303.7	1271	122	1149	921	170	751	1109	204	905	0	1.27	0.344828
62	Protein containing a CCCH-type zinc finger domain, which bind DNA or RNA	3	B0336.3	B0336.3	B0336.3	1715	119	1596	932	183	749	1122	220	902	0	1.769	0.822934
63	Putative ortholog of C. elegans Y108G3B.A gene product	5	B0348.5	B0348.5	B0348.5	323	124	199	198	182	16	238	219	19	0	10.474	3.38874
64	Protein containing one uncharacterized ACR domain, has low similarity to uncharacterized human HSPC109	3	B0361.6	B0361.6	B0361.6	1359	125	1234	1060	172	888	1277	207	1070	0	1.153	0.205393
65	Member of the ubiquitin-conjugating enzyme (E2) family, which catalyze the covalent attachment of ubiquitin to target proteins, has a region of low similarity to a region of baculoviral IAP repeat-containing 6 (human BIRC6)	X	B0403.2	B0403.2	B0403.2	772	123	649	605	182	423	728	219	509	0	1.275	0.350497
66	Protein with high similarity to protein disulfide isomerase-related protein (rat Rn.2685), which catalyzes disulfide isomerization and the formation of disulfide bonds during protein folding, member of the thioredoxin family	X	B0403.4	B0403.4	B0403.4	1004	125	879	633	204	429	762	245	517	0	1.7	0.765535
67	Protein of unknown function, has weak similarity to human dentin phosphoryn and S. cerevisiae Aga1p (a-Agglutinin anchor subunit)	1	C01G8.6	C01G8.6	C01G8.6	956	127	829	731	219	512	880	263	617	0	1.344	0.426533
68	Putative ortholog of C. elegans C01G8.7 gene product	1	C01G8.9	C01G8.9	C01G8.8	1466	130	1336	954	232	722	1149	279	870	0	1.536	0.619178
69	Protein containing two DUF40 domains of unknown function, which contain four conserved cysteines, has moderate similarity to uncharacterized C. elegans C02A12.3	5	C02A12.5	C02A12.5	C02A12.5	246	127	119	272	230	42	327	277	50	0	2.38	1.25096
70	Protein of unknown function, contains proline-rich domains, has weak similarity in the C-terminal portion to the human glutamine rich protein KIAA0181 (Hs.159613)	4	C02B10.5	C02B10.5	C02B10.5	942	124	818	752	228	524	906	274	632	0	1.294	0.371838
71	Protein containing a neurotransmitter-gated ion-channel ligand binding domain, has weak similarity to muscle cholinergic receptor nicotinic alpha subunit 1 (mouse Chrna1), which contains major binding sites for acetylcholine	3	C02C2.3	C02C2.3	C02C2.3	741	120	621	735	222	513	885	267	618	0	1.005	0.0071955
72	Protein of unknown function, has high similarity to uncharacterized C. elegans C02E7.4	5	C02E7.2	C02E7.2	C02E7.2	212	122	90	217	226	-9	261	272	-11	0
73	Member of an uncharacterized protein family	1	C34G6.6	C34G6.6	C34G6.6	1022	130	892	550	243	307	662	292	370	0	2.411	1.26963
74	Protein predicted to contain a glycosylphosphatidylinositol (GPI) lipid anchor	4	C34H4.1	C34H4.1	C34H4.1	640	131	509	427	244	183	514	293	221	0	2.303	1.20351
75	Protein of unknown function, has low similarity to uncharacterized C. elegans K11H12.4	4	C34H4.3	C34H4.3	C34H4.3	833	131	702	622	246	376	749	296	453	0	1.55	0.632268
76	Putative paralog of C. elegans F44D12.4 gene product	3	C35D10.2	C35D10.2	C35D10.2	314	135	179	1390	256	1134	1674	308	1366	0	0.131	-2.93236
77	Protein with moderate similarity to C. elegans C35E7.3 gene product	1	C35E7.2	C35E7.2	C35E7.2	453	134	319	435	261	174	524	314	210	0	1.519	0.603122
78	Protein with strong similarity to C. elegans C35E7.5 gene product	1	C35E7.4	C35E7.4	C35E7.4	1139	125	1014	1025	268	757	1234	322	912	0	1.112	0.153157
79	Member of the protein-tyrosine phosphatase family, which are involved in control of cell growth, proliferation, differentiation and transformation, has very strong similarity to uncharacterized C. elegans C50F2.5	1	C43E11.5	C43E11.5	C43E11.5	318	117	201	531	125	406	639	150	489	0	0.411	-1.28279
80	Member of the Exo70 exocyst complex subunit family, has weak similarity to exocyst component protein 70 kDa homolog (rat Exo70), which is involved in exocytic vesicle targeting and neuronal differentiation and outgrowth	1	C43E11.8	C43E11.8	C43E11.8	1329	144	1185	904	185	719	1089	222	867	0	1.367	0.451013
81	Protein with high similarity to ATP-binding cassette subfamily D (ALD) member 3 (human ABCD3), which mediates peroxisomal import of fatty acids and fatty acyl-CoAs and is associated with Zellweger syndrome, member of the ATP-binding cassette superfamily	2	C44B7.8	C44B7.8	C44B7.8	1273	166	1107	1077	199	878	1297	239	1058	0	1.046	0.0648829
82	Member of the adenosine and AMP deaminase and cetyl-CoA hydrolases or transferase families, has a region of low similarity to a region of S. cerevisiae Ach1p, which is an acetyl-CoA hydrolase involved in acetate utilization and sporulation	2	C44B7.10	C44B7.10	C44B7.10	917	158	759	929	198	731	1119	238	881	0	0.862	-0.21424
83	Member of the reverse transcriptase protein family, which are RNA-dependent DNA polymerases, has strong similarity to uncharacterized C. elegans Y51H4A.14	4	C44B12.7/(ost-1)	C44B12.7	C44B12.7	398	152	246	294	198	96	354	238	116	0	2.121	1.08474
84	Protein of unknown function, has high similarity to uncharacterized C. elegans C44C3.6	5	C44C3.5	C44C3.5	C44C3.5	267	138	129	232	189	43	279	227	52	0	2.481	1.31092
85	Protein of unknown function, has moderate similarity to C. elegans C56A3.2	5	C14C10.2	C14C10.2	C14C10.2	1018	126	892	1027	190	837	1237	228	1009	0	0.884	-0.177882
86	Member of the RNA helicase, DEAD-box protein family involved in RNA interference and gene silencing by antisense RNAs	5	mut-14/C14C11.6	C14C11.6	C14C11.6	942	123	819	621	190	431	748	228	520	0	1.575	0.655352
87	Member of the seven-transmembrane receptor odorant receptor family, which function in olfaction, has moderate similarity to uncharacterized C. elegans GUR-3	X	gur-2/C14F11.3	C14F11.3	C14F11.3	634	122	512	498	190	308	600	228	372	0	1.376	0.46048
88	Member of the Hsp20 or alpha crystallin family, has a region of low similarity to heat shock 27kD protein 1 (human HSPB1), which plays a role in thermotolerance and functions as a chaperone and negative regulator of apoptosis	X	hsp43/C14F11.5	C14F11.5	C14F11.5	2562	122	2440	2959	198	2761	3565	238	3327	0	0.733	-0.448115
89	Protein containing two neurotransmitter-gated ion-channel ligand binding domains, has a region of weak similarity to a region of alpha 7 subunit of the neuronal nicotinic acetylcholine receptor (human CHRNA7), which is highly permeable to calcium	X	C15A7.1	C15A7.1	C15A7.1	360	123	237	326	198	128	392	238	154	0	1.539	0.621993
90	Member of the cation efflux family, which may be membrane divalent cation transporters, has low similarity to zinc transporter 1 (rat Slc30a1), which lowers intracellular zinc by stimulating zinc efflux and reduces vulnerability to Zn2+ induced toxicity	X	cdf-1/C15B12.7	C15B12.7	C15B12.7	1004	123	881	639	194	445	769	233	536	0	1.644	0.71721
91	Member of the amiloride-sensitive sodium channel family, which are involved in sodium reabsorption, has weak similarity to neuronal amiloride-sensitive cation channel 1 (degenerin, rat Accn1), which is a non-voltage-dependent H+-gated sodium channel	X	C18B2.6	C18B2.6	C18B2.6	298	125	173	157	194	-37	189	233	-44	0
92	Protein containing a DUF38 domain of unknown function	5	C18D4.2	C18D4.2	C18D4.2	348	126	222	252	204	48	303	245	58	0	3.828	1.93659
93	Member of an uncharacterized protein family	5	C18D4.8	C18D4.8	C18D4.8	906	127	779	1104	219	885	1330	263	1067	0	0.73	-0.454032
94	Piwi-related protein with similarity over the C-terminal region to human and D. melanogaster PIWI proteins and C. elegans PRG-1/PRG-2, all of which are involved in germ-line proliferation	1	C18E3.7	C18E3.7	C18E3.7	3269	131	3138	1750	235	1515	2108	283	1825	0	1.719	0.78157
95	Protein of unknown function, has high similarity to uncharacterized C. elegans E03H4.5	5	C18G1.6	C18G1.6	C18G1.6	410	130	280	332	236	96	400	284	116	0	2.414	1.27143
96	Protein containing two BRCA1 (breast cancer type 1) C terminus (BRCT) domains, which are found in some cell cycle checkpoint proteins and one WSN domain of unknown function, has low similarity to uncharacterized C. elegans F37A4.4	3	C18H2.4	C18H2.4	C18H2.4	188	122	66	186	228	-42	224	274	-50	0
97	Member of the acyl-CoA dehydrogenase protein family	1	C55B7.4	C55B7.4	C55B7.4	801	118	683	311	219	92	374	263	111	0	6.153	2.62129
98	Protein with moderate similarity to sulfate transporters	1	C55B7.6	C55B7.6	C55B7.6	337	123	214	281	225	56	338	271	67	0	3.194	1.67536
99	Functional ortholog of S. cerevisiae Dbr1p, lariat RNA debranching enzyme	1	dbr-1/Ce-dbr1/C55B7.8	C55B7.8	C55B7.8	920	128	792	698	240	458	840	289	551	0	1.437	0.52306
100	Protein of unknown function, has low similarity to uncharacterized C. elegans C55C2.4	1	C55C2.3	C55C2.3	C55C2.3	290	128	162	278	244	34	334	293	41	0	3.951	1.98222
101	Protein containing a protein kinase domain and a Src homology 2 (SH2) domain, has moderate similarity to fer (fps/fes related) tyrosine kinase (mouse Fert2), which may mediate cell-cell signaling and cell size-dependent cytoskeletal reorganization	m	C55C3.4	C55C3.4	C55C3.4	404	133	271	565	250	315	680	301	379	0	0.715	-0.483985
102	Protein of unknown function, has low similarity to uncharacterized C. elegans T14C1.1	5	C56A3.3	C56A3.3	C56A3.3	271	141	130	270	252	18	325	303	22	0	5.909	2.56291
103	Member of the 7-transmembrane chemoreceptor family of G protein-coupled receptors (GPCR), has moderate similarity to uncharacterized C. elegans K08G2.5	5	D1054.12	D1054.12	D1054.12	215	145	70	242	263	-21	291	316	-25	0
104	Protein containing a WSN domain of unknown function	5	D1065.3	D1065.3	D1065.3	212	131	81	250	268	-18	301	322	-21	0
105	Large protein of unknown function, has weak similarity over the C-terminus to a number of S. cerevisiae and C. elegans proteins, has weak similarity to several proteins of the human pathogen Plasmodium falciparum	1	D2005.4	D2005.4	D2005.4	856	119	737	485	105	380	584	126	458	0	1.609	0.686164
106	Protein containing five WD domains (WD-40 repeat), which may mediate protein-protein interactions, and a FYVE zinc finger domain, which bind phosphatidylinositol 3-phosphate, has moderate similarity to uncharacterized human WDF2	2	D2013.2	D2013.2	D2013.2	2460	144	2316	1654	143	1511	1992	172	1820	0	1.273	0.348232
107	Protein with high similarity to C. elegans ROL-6, which is involved in cuticle synthesis, contains two collagen triple helix repeats, which are found in some extracellular proteins, and a nematode cuticle collagen N-terminal domain	5	D2023.7	D2023.7	D2023.7	8650	169	8481	3103	179	2924	3738	215	3523	0	2.407	1.26724
108	Member of the GNS1 or SUR4 family of integral membrane proteins, has a region of moderate similarity to polyunsaturated fatty acid (PUFA) elongase (C. elegans CEEl01), which contains the condensation activity required for fatty acid elongation	4	D2024.3	D2024.3	D2024.3	1697	173	1524	901	188	713	1085	226	859	0	1.774	0.827006
109	Protein containing one molybdopterin binding, one [2Fe-2S] binding, one a-b hammerhead, and one 2Fe-2S iron-sulfur cluster binding domain, has low similarity to xanthine dehydrogenase (rat Xdh), which converts xanthine to uric acid in purine catabolism	4	F15E6.6	F15E6.6	F15E6.6	728	145	583	450	200	250	542	240	302	0	1.93	0.948601
110		5		F15E11.2	F15E11.2	320	131	189	231	196	35	278	236	42	0	4.5	2.16993
111		5		F15E11.6	F15E11.6	1037	120	917	958	197	761	1154	237	917	0	1	0
112	Protein involved in recombination and in uterine cell adhesion, putative member of the Immunoglobulin superfamily	X	him-4/hemicentin/F15G9.4	F15G9.4	F15G9.4	466	120	346	198	197	1	238	237	1	0	346	8.43463
113	Member of a protein family	5	F15H10.7	F15H10.7	F15H10.7	317	120	197	284	196	88	342	236	106	0	1.858	0.893751
114	Member of the nuclear hormone receptor/Zinc finger protein family	5	F16B4.1	F16B4.1	F16B4.1	876	121	755	892	201	691	1074	242	832	0	0.907	-0.140826
115	Protein with moderate similarity to stromal antigen 1 (human STAG1), which is a component of a 14S cohesin complex that binds to chromatin before and after mitosis and may play a role in organizing interphase chromatin	5	F18E2.3	F18E2.3	F18E2.3	1139	123	1016	742	206	536	893	248	645	0	1.575	0.655352
116	Putative coiled-coil protein, has weak similarity to myosins	X	F18H3.4	F18H3.4	F18H3.4	949	121	828	835	207	628	1006	249	757	0	1.094	0.129613
117	Member of the ABC transporter family, has low similarity to white protein (Drosophila) (ATP-binding cassette subfamily G member 1) (mouse Abcg1), which is an ABC transporter involved in cellular sterol homeostasis	4	F19B6.4	F19B6.4	F19B6.4	239	122	117	277	208	69	333	250	83	0	1.41	0.495695
118	Putative coiled-coil protein, has weak similarity to myosins	2	F19B10.4	F19B10.4	F19B10.4	295	122	173	284	213	71	342	256	86	0	2.012	1.00863
119	Protein containing a T-box domain, which bind DNA, has weak similarity to a region of T-box 22 (human TBX22), which plays a role in palatogenesis and is associated with X-linked cleft palate	2	F19B10.9	F19B10.9	F19B10.9	1001	124	877	642	221	421	773	266	507	0	1.73	0.790772
120	Member of the M13 peptidase family of zinc metalloproteases, has high similarity to uncharacterized C. elegans C17B7.10	X	F19C6.4	F19C6.4	F19C6.4	511	129	382	629	230	399	757	277	480	0	0.796	-0.32916
121	Protein of unknown function, has low similarity to uncharacterized C. elegans F35E12.10	5	F35E12.2	F35E12.2	F35E12.2	206	127	79	222	234	-12	267	281	-14	0
122	Protein of unknown function, has low similarity to uncharacterized C. elegans F20G2.5	5	F35E12.8	F35E12.8	F35E12.8	715	123	592	514	230	284	619	277	342	0	1.731	0.791606
123	Protein of unknown function, has low similarity to uncharacterized C. elegans Y116A8A.6	1	F35E2.5	F35E2.5	F35E2.5	194	120	74	230	230		277	277		0
124	Protein containing nuclear hormone receptor C4-type zinc finger and ligand-binding domains, has low similarity to estrogen-related receptor beta (mouse Esrrb), which is a putative transcription factor that is required for placental development	5	F35E8.12	F35E8.12	F35E8.12	487	126	361	579	237	342	697	285	412	0	0.876	-0.190997
125	Member of an uncharacterized protein family	5	F35E8.6	F35E8.6	F35E8.6	208	130	78	197	247	-50	237	297	-60	0
126	Protein of unknown function, has low similarity to uncharacterized C. elegans T20D4.5	5	F35F10.1	F35F10.1	F35F10.1	526	134	392	563	251	312	678	302	376	0	1.043	0.0607392
127	Member of the alpha or beta hydrolase fold family, has low similarity to uncharacterized mouse AI326074	3	F37A4.1	F37A4.1	F37A4.1	1759	157	1602	1265	262	1003	1524	315	1209	0	1.325	0.405992
128	Protein with high similarity to 26S proteasome-associated Pad1 homolog (human POH1), which is a subunit of the 26S proteasome that confers multidrug resistance and resistance to ultraviolet light, member of the Mov34, MPN or PAD-1 family	3	F37A4.5	F37A4.5	F37A4.5	356	167	189	416	280	136	501	337	164	0	1.152	0.204141
129	Protein containing ten C2 domains, which may be involved in calcium-dependent phospholipid binding, and five Rabphilin-3A effector domains, which are involved in protein transport in synaptic vesicles, has low similarity to rabphilin-3A (mouse Rph3a)	3	rbf-1/F37A4.7	F37A4.7	F37A4.7	768	161	607	617	279	338	743	336	407	0	1.491	0.57628
130	Protein containing a BTB (BR-C, ttk and babor) or POZ (Pox virus and zinc finger) domain and a meprin and TRAF homology (MATH) domain, has weak similarity to uncharacterized speckle-type POZ protein (mouse Spop)	3	F37A4.9	F37A4.9	F37A4.9	1232	143	1089	923	270	653	1112	325	787	0	1.384	0.468844
131	Putative intermediate filament protein	5	ifc-1/Cel-IF-C1/F37B4.2	F37B4.2	F37B4.2	968	116	852	554	88	466	667	106	561	0	1.519	0.603122
132	Member of the aldo-keto reductase family, which include some related monomeric NADPH-dependent oxidoreductases	3	F37C12.12	F37C12.12	F37C12.12	312	126	186	185	142	43	222	171	51	0	3.647	1.86671
133	Member of the reverse transcriptase protein family, which are RNA-dependent DNA polymerases, has moderate similarity to uncharacterized C. elegans F38E9.3	m	ZK250.1	ZK250.1	ZK250.1	189	127	62	133	172	-39	160	207	-47	0
134		2		multiple	ZK250.3	250	126	124	148	181	-33	178	218	-40	0
135	Protein containing two meprin and TRAF homology (MATH) domains, two DUF38 domains of unknown function, and an F-box domain, which link a target protein with a ubiquitin-conjugating enzyme, has high similarity to uncharacterized C. elegans T08E11.1	2	ZK250.5	ZK250.5	ZK250.5	863	120	743	1186	193	993	1428	232	1196	0	0.621	-0.687335
136	Protein containing three meprin and TRAF homology (MATH) domains, has high similarity to uncharacterized C. elegans C16C4.13	2	ZK250.7	ZK250.7	ZK250.7	408	118	290	330	194	136	397	233	164	0	1.768	0.822118
137	Putative paralog of C. elegans F59H6.I, has similarity at the C-terminus of S. cerevisiae PIF1, mitochondrial DNA repair and recombination protein	2	ZK250.9/Y16E11A.2	ZK250.9	ZK250.9	193	119	74	159	191	-32	191	230	-39	0
138	Protein with weak similarity to C. elegans B0244.8	5	ZK287.1	ZK287.1	ZK287.1	2389	117	2272	1329	191	1138	1601	230	1371	0	1.657	0.728574
139	Protein with high similarity to C. elegans F10G8.1, which is a putative tyrosine protein phosphatase involved in embryogenesis and morphogenesis, member of the protein-tyrosine phosphatase family	1	ZK484.7	ZK484.7	ZK484.7	262	114	148	311	190	121	374	228	146	0	1.014	0.0200577
140	Protein containing a DUF138 domain of unknown function, has high similarity to uncharacterized C. elegans ZK488.6	5	ZK488.5	ZK488.5	ZK488.5	236	116	120	195	197	-2	234	237	-3	0
141	Protein of unknown function, has weak similarity to human protein KIAA0590 (Hs.111862)	3	ZK520.1	ZK520.1	ZK520.1	724	120	604	435	205	230	524	246	278	0	2.173	1.11969
142		3		U58084-1.ZK520	ZK520.4	1467	119	1348	720	206	514	867	248	619	0	2.178	1.123
143	Putative coiled-coil protein, has weak similarity to S. cerevisiae Uso1p, required for protein transport from ER to Golgi	2	ZK546.1	ZK546.1	ZK546.1	1360	126	1234	704	215	489	848	259	589	0	2.095	1.06695
144	Member of the trypsin family of serine proteases, has low similarity to proprostasin (human PRSS8), which is a precursor of active membrane-bound serine protease secreted into seminal fluid that may be a suppressor of invasive prostate and breast cancer	2	ZK546.15	ZK546.15	ZK546.15	963	122	841	456	222	234	549	267	282	0	2.982	1.57628
145	Protein with weak similarity to syntaxin 18 (human STX18), which functions in transport between the endoplasmic reticulum and Golgi and causes endoplasmic reticulum aggregation when overexpressed	5	T10H9.3	T10H9.3	T10H9.3	1600	123	1477	1247	224	1023	1502	269	1233	0	1.198	0.260628
146	Protein containing an AT-hook motif, which bind DNA with a preference for A-T rich regions, and a ubiquitin interaction motif	5	T11A5.1	T11A5.1	T11A5.1	266	128	138	304	230	74	366	277	89	0	1.551	0.633199
147	Putative coiled-coil protein, has weak similarity to myosins	4	T11B7.1	T11B7.1	T11B7.1	614	126	488	603	237	366	726	285	441	0	1.107	0.146655
148	Putative ortholog of C. elegans T11F8.1 gene product	4	T11F8.2	T11F8.2	T11F8.2	360	125	235	262	238	24	315	286	29	0	8.103	3.01846
149	Protein containing two protein kinase domains, has weak similarity to S. cerevisiae Yck1p, which is a casein kinase I isoform involved in protein amino acid phosphorylation	4	T11F8.4	T11F8.4	T11F8.4	255	124	131	279	236	43	336	284	52	0	2.519	1.33285
150	Protein of unknown function	5	T11F9.12	T11F9.12	T11F9.12	679	127	552	745	241	504	897	290	607	0	0.909	-0.137648
151	Member of the RNA methyltransferase family, which may be 2'-O-methyltransferases, has a region of low similarity to a region of TAR (HIV) RNA-binding protein 1 (human TARBP1), which is an RNA-binding protein involved in regulating HIV gene expression	2	T14B4.1	T14B4.1	T14B4.1	997	132	865	746	252	494	898	303	595	0	1.454	0.540027
152	Member of the core-2 or I-branching enzyme family, which form blood group I-antigens or O-glycan side-chains, has weak similarity to human GCNT1, which forms O-glycan branched structures and is involved in Wiskott-Aldrich syndrome and multiple sclerosis	2	T14B4.9	T14B4.9	T14B4.9	313	143	170	346	254	92	416	306	110	0	1.545	0.627607
153	Protein containing two protein kinase domains, has a region of moderate similarity to a region of met protooncogene (rat Met), which may function in cell proliferation, differentiation, and migration and in organ development	X	T14E8.1	T14E8.1	T14E8.1	1035	155	880	733	261	472	883	314	569	0	1.547	0.629473
154	Protein of unknown function, has high similarity to uncharacterized human CGI-11	X	T14F9.1	T14F9.1	T14F9.1	2844	159	2685	1899	283	1616	2287	340	1947	0	1.379	0.463622
155	Protein containing glycosyl hydrolase family 20 domain 2 and catalytic domains, has moderate similarity to hexosaminidase B (mouse Hexb), which is a subunit of an enzyme that catalyzes the degradation of ganglioside GM2 and blocks polyspermy	X	T14F9.3	T14F9.3	T14F9.3	2678	151	2527	3877	276	3601	4671	332	4339	0	0.582	-0.780909
156	Protein of unknown function, has low similarity to uncharacterized C. elegans W06H3.1	X	T14G11.3	T14G11.3	T14G11.3	994	139	855	802	263	539	966	316	650	0	1.315	0.395063
157	Protein with strong similarity to C. elegans W04G3.8 gene product	X	W04G3.3	W04G3.3	W04G3.3	1509	114	1395	757	96	661	912	115	797	0	1.75	0.807355
158	Member of the sulfate transporter family, has moderate similarity to a region of solute carrier family 26 member 4 (pendrin, human SLC26A4), which is an anion transporter that may transport bicarbonate and iodide and is associated with Pendred syndrome	X	W04G3.6	W04G3.6	W04G3.6	962	117	845	548	139	409	660	167	493	0	1.714	0.777367
159	Putative receptor tyrosine protein kinase, has similarity to human and D. melanogaster fibroblast growth factorreceptor-related protein kinases	1	kin-23/Cehd-7/W04G5.6	W04G5.6	W04G5.6	416	120	296	252	170	82	303	204	99	0	2.99	1.58015
160	Protein of unknown function, has strong similarity to uncharacterized C. elegans W03G9.3	1	W05F2.2	W05F2.2	W05F2.2	2106	120	1986	1098	177	921	1322	213	1109	0	1.791	0.840765
161	Protein with moderate similarity to C. elegans hpl-2 gene product	1	W05F2.7	W05F2.7	W05F2.7	611	120	491	381	189	192	459	227	232	0	2.116	1.08134
162	Member of the calpain family of cysteine proteases, has a region of low similarity to a region of mouse Capn9, which is a calcium-dependent non-lysosomal protease that suppresses neoplastic transformation	3	W05G11.4	W05G11.4	W05G11.4	291	118	173	235	193	42	283	232	51	0	3.392	1.76214
163	Member of the intermediate filament family, which are components of the cytoskeleton and nuclear envelope, contains an intermediate filament tail domain, has low similarity to lamin B1 (mouse Lmnb1), which may be a structural member of the nuclear lamina	X	ifa-2/W10G6.3/Cel-IF-A2	W10G6.3	W10G6.3	1339	118	1221	892	193	699	1074	232	842	0	1.45	0.536053
164	Protein of unknown function	3	Y102E9.2	Y102E9.2	Y102E9.2	2772	120	2652	1876	190	1686	2260	228	2032	0	1.305	0.38405
165	Protein containing a nuclear hormone receptor C4-type zinc finger domain, which bind DNA and may be involved in regulation of transcription, has weak similarity to C. elegans NHR-58, which is involved in embryogenesis and morphogenesis	5	Y17D7B.1	Y17D7B.1	Y17D7B.1	684	117	567	603	188	415	726	226	500	0	1.134	0.181421
166	Putative ortholog of C. elegans Y67D8C.2 gene product	5	Y20C6A.3	Y20C6A.3	Y20C6A.3	240	118	122	276	197	79	332	237	95	0	1.284	0.360645
167	Member of an uncharacterized protein family with weak similarity to Entemeba histolytica N-acetylmuraminidase	5	Y22F5A.4	Y22F5A.4	Y22F5A.4	3693	120	3573	1733	205	1528	2087	246	1841	0	1.941	0.9568
168	Protein with high similarity to cysteinyl-tRNA synthetase (human CARS), which aminoacylates tRNA with cysteine for protein biosynthesis and interacts with elongation factor 1 gamma (human EEF1G), member of the class I cysteinyl (C) tRNA synthetase family	1	Y23H5A.7	Y23H5A.7	Y23H5A.7	2357	123	2234	1384	208	1176	1667	250	1417	0	1.577	0.657183
169	Protein with high similarity to C. elegans F10G8.1, which is involved in embryogenesis or morphogenesis, member of the protein-tyrosine phosphatase family, which are involved in control of cell growth, proliferation, differentiation and transformation	4	K07F5.8	K07F5.8	K07F5.8	234	123	111	330	208	122	397	250	147	0	0.755	-0.405451
170	Protein of unknown function, has a region of low similarity to nucleoporin p54 (rat Nup54), which is a component of the p62 complex that is localized on both sides of the nuclear pore complex and binds to nuclear import factors rat Impnb and rat Rn.7345	4	K07F5.13	K07F5.13	K07F5.13	1330	119	1211	822	216	606	990	260	730	0	1.659	0.730314
171	Protein with weak similarity to S. cerevisiae YAL035W (Translation initiation factor 2 (eIF2))	1	K07G5.3	K07G5.3	K07G5.3	321	122	199	377	223	154	454	268	186	0	1.07	0.0976108
172	Member of the divalent cation transporter family, which may transport Mg2+ or other divalent cations into the cell, has high similarity to uncharacterized human DKFZP434K0427	4	K07H8.2	K07H8.2	K07H8.2	2012	129	1883	1194	226	968	1438	272	1166	0	1.615	0.691534
173	Yolk proteins yp115 and yp88	4	vit-6/K07H8.6	K07H8.6	K07H8.6	6459	132	6327	5537	237	5300	6671	285	6386	0	0.991	-0.013043
174	Protein containing two RNA recognition motifs (RRM, RBD, or RNP)	4	K07H8.10	K07H8.10	K07H8.10	6891	126	6765	4375	240	4135	5271	289	4982	0	1.358	0.441483
175	Putative paralog of C. elegans K11G12.1, has similarity to C. elegans TOH-2, a member of the CUB domain protein family	X	K09C8.3	K09C8.3	K09C8.3	1584	126	1458	621	239	382	748	287	461	0	3.163	1.66129
176	Protein of unknown function, has high similarity to uncharacterized C. elegans C08A9.9	X	K09E3.5	K09E3.5	K09E3.5	335	129	206	402	248	154	484	298	186	0	1.108	0.147958
177	Putative ortholog of C. elegans T23C6.3 gene product	X	K09E3.7	K09E3.7	K09E3.7	334	130	204	427	258	169	514	310	204	0	1	0
178	Protein containing a DUF33 domain of unknown function, has high similarity to uncharacterized C. elegans K09E10.2	4	K09E10.1	K09E10.1	K09E10.1	273	135	138	423	257	166	509	309	200	0	0.69	-0.535332
179	Protein of unknown function, has high similarity to uncharacterized C. elegans F54H12.4	2	K09F6.1	K09F6.1	K09F6.1	520	143	377	769	258	511	926	310	616	0	0.612	-0.708396
180	Protein containing a WSN domain of unknown function	2	K09F6.4	K09F6.4	K09F6.4	299	144	155	474	265	209	571	319	252	0	0.615	-0.701342
181	Protein of unknown function	X	F54F7.2	F54F7.2	F54F7.2	508	140	368	708	271	437	853	326	527	0	0.698	-0.518701
182	Protein with weak similarity to C. elegans R04D3.2	X	F54F7.6	F54F7.6	F54F7.6	449	133	316	464	265	199	559	319	240	0	1.317	0.397255
183	Protein with high similarity to diacylglycerol kinase 90 kDa (rat Dagk), contains two phorbol esters or diacylglycerol binding domains (C1 domain), two EF hand domains, and diacylglycerol kinase (DAGK) catalytic and accessory domains	3	F54G8.2	F54G8.2	F54G8.2	433	112	321	245	99	146	295	119	176	0	1.824	0.867106
184	Putative ortholog of C. elegans ptr gene product	3	F54G8.5	F54G8.5	F54G8.5	257	111	146	156	122	34	187	146	41	0	3.561	1.83228
185	Protein of unknown function, putative paralog of C. elegans K09F6.5	3	F54H12.2	F54H12.2	F54H12.2	283	117	166	207	134	73	249	161	88	0	1.886	0.91533
186	Protein containing an F-box domain, which serve as a link between a target protein and a ubiquitin-conjugating enzyme	3	F54H12.5	F54H12.5	F54H12.5	1832	117	1715	270	116	154	325	139	186	0	9.22	3.20477
187	Protein with similarity to hCIR, a human transcriptional repressor	1	F55F8.4	F55F8.4	F55F8.4	5171	118	5053	3365	163	3202	4054	196	3858	0	1.31	0.389567
188	Member of the protein-tyrosine phosphatase family, which are involved in control of cell growth, proliferation, and differentiation, has a region of moderate similarity to a region of human PTPN3, which is a non-receptor protein tyrosine phosphatase	1	F55F8.7	F55F8.7	F55F8.7	309	114	195	727	188	539	875	226	649	0	0.3	-1.73697
189	Protein of unknown function	4	F55G1.14	F55G1.14	F55G1.14	1266	112	1154	1417	194	1223	1707	233	1474	0	0.783	-0.352916
190	Member of the mitochondrial carrier protein family of membrane transporters, has low similarity to 2-oxodicarboxylate transporter (S. cerevisiae ODC1), which is a transporter with specificity for 2-oxoadipate and 2-oxoglutarate	4	F55G1.5	F55G1.5	F55G1.5	822	119	703	615	195	420	740	234	506	0	1.389	0.474047
191	Serine/threonine protein kinase with strong similarity to Drosophila POLO, human PLK, yeast Cdc5p, and other members of the polo family, which are involved in activation of the anaphase-promoting complex in late mitosis	4	plk-2/plc-2/plc2/F55G1.8	F55G1.8	F55G1.8	3030	125	2905	2032	194	1838	2448	233	2215	0	1.312	0.391768
192	Member of the sodium:neurotransmitter symporter family, has low similarity to solute carrier family 6 member 5 (human SLC6A5), which is a sodium and chloride-dependent glycine transporter that may function in synaptic transmission	1	F55H12.1	F55H12.1	F55H12.1	257	123	134	355	203	152	427	244	183	0	0.732	-0.450084
193	Protein containing six TPR (tetratrico peptide repeat) domains, which may mediate protein-protein interactions, has weak similarity to human TOMM34, which is a subunit of the mitochondrial translocase that is involved in mitochondrial protein import	5	R09E12.3	R09E12.3	R09E12.3	3236	123	3113	1826	207	1619	2200	249	1951	0	1.596	0.674461
194	Protein of unknown function, has very strong similarity to uncharacterized C. elegans K02E7.3	m	R09E12.6	R09E12.6	R09E12.6	510	126	384	419	212	207	504	255	249	0	1.542	0.624803
195	Protein of unknown function, has moderate similarity to uncharacterized C. elegans C38D9.3	X	R09H3.1	R09H3.1	R09H3.1	218	124	94	212	214	-2	255	257	-2	0
196	G protein-coupled receptor, member of an unnamed subfamily, no homolog in human or D. melanogaster	5	R10D12.4	R10D12.4	R10D12.4	284	117	167	220	217	3	265	261	4	0	41.75	5.3837
197	Protein containing a CX module domain, has high similarity to uncharacterized C. elegans F53C3.6	5	B0222.1	B0222.1	B0222.1	806	125	681	540	226	314	650	272	378	0	1.802	0.849599
198	Member of the phosphate transporter family, has moderate similarity to sodium inorganic phosphate cotransporter (solute carrier family 20 member 1, rat Slc20a1), which is a high-affinity sodium-inorganic phosphate cotransporter	5	B0222.3	B0222.3	B0222.3	928	131	797	716	232	484	862	279	583	0	1.367	0.451013
199	Member of the troponin family, which regulate calcium-induced muscle contraction	X	C14F5.3	C14F5.3	C14F5.3	1441	129	1312	1009	239	770	1215	287	928	0	1.414	0.499782
200	Protein containing three fibronectin type III domains, which are involved in cell surface binding, and two protein kinase domains, has weak similarity to mouse Ros1, which is a proto-oncogene and protein tyrosine kinase with transformation potential	5	C16D9.2	C16D9.2	C16D9.2	423	121	302	322	242	80	387	291	96	0	3.146	1.65352
201	Protein containing a DUF235 domain of unknown function, has high similarity to uncharacterized C. elegans F22E5.1	5	C16D9.5	C16D9.5	C16D9.5	226	124	102	321	247	74	386	297	89	0	1.146	0.196607
202	Protein containing a DUF32 domain of unknown function, has high similarity to uncharacterized C. elegans C24B9.2	5	C16D9.7	C16D9.7	C16D9.7	270	130	140	264	259	5	318	312	6	0	23.333	4.5443
203	Protein of unknown function	X	C17H11.2	C17H11.2	C17H11.2	449	132	317	439	264	175	528	318	210	0	1.51	0.594549
204	Putative member of immunoglobulin superfamily of proteins	X	dim-1/C18A11.7	C18A11.7	C18A11.7	2894	134	2760	2311	261	2050	2784	314	2470	0	1.117	0.159629
205	Tryptophan hydroxylase involved in serotonin biosynthesis	2	tph-1/ZK1290.2	ZK1290.2	ZK1290.2	419	136	283	246	264	-18	296	318	-22	0
206	Member of the CCAAT box-binding transcription factor or nuclear factor I family, which bind DNA, has a region of high similarity to a region of nuclear factor I-C (mouse Nfic), which is a CCAAT-binding cellular and viral transcription factor	2	nfi-1/ZK1290.4	ZK1290.4	ZK1290.4	978	154	824	941	279	662	1133	336	797	0	1.034	0.0482362
207	Beta tubulin expressed specifically in touch receptor neurons	X	mec-7/mec-11/tub-2/ZK154.3	ZK154.3	ZK154.3	2482	149	2333	1715	283	1432	2066	340	1726	0	1.352	0.435095
208	Protein with low similarity to A disintegrin and metalloproteinase domain 17 (tumor necrosis factor alpha converting enzyme, human ADAM17), which stimulates TNF release and may be associated with cardiomyopathy, osteoarthritis, and Alzheimer's disease	X	adm-4/ZK154.7	ZK154.7	ZK154.7	612	133	479	450	278	172	542	334	208	0	2.303	1.20351
209	Protein containing ten leucine rich repeats, which mediate protein-protein interactions, has low similarity to a region of C. elegans SYM-1, which is required for attachment of body muscle to cuticle in absence of MEC-8	5	ZK682.5	ZK682.5	ZK682.5	344	110	234	180	91	89	216	109	107	0	2.187	1.12895
210	Protein with high similarity to exportin 1 (human XPO1), which is a cell cycle-regulated nuclear export receptor that mediates NES-containing protein export from the nucleus and may be required for autophagy	5	ZK742.1	ZK742.1	ZK742.1	2143	112	2031	816	99	717	983	119	864	0	2.351	1.23327
211	Protein containing six Pumilio-family (Puf) RNA binding domains, has moderate similarity to a region of C. elegans FBF-2, which is an RNA-binding protein involved in sex determination	4	puf-7/B0273.2	B0273.2	B0273.2	3169	116	3053	1592	98	1494	1918	118	1800	0	1.696	0.762136
212	Member of the ligand-gated ion channel protein family	3	glr-2/B0280.12	B0280.12	B0280.12	397	116	281	265	96	169	319	115	204	0	1.377	0.461529
213	Protein of unknown function, has moderate similarity to uncharacterized C. elegans B0284.2	3	B0284.4	B0284.4	B0284.4	251	115	136	233	113	120	280	136	144	0	0.944	-0.0831412
214	Putative leucine carboxyl methyltransferase, has similarity to human LCMT	3	B0285.4	B0285.4	B0285.4	2060	110	1950	1438	164	1274	1732	197	1535	0	1.27	0.344828
215	Member of the choline or ethanolamine kinase family, which catalyze formation of phosphatidylcholine by the CDP-choline pathway, has low similarity to a region of choline-ethanolamine kinase (rat Chkl), which is involved in phosphatidylcholine synthesis	3	B0285.10	B0285.10	B0285.10	248	117	131	241	187	54	290	225	65	0	2.015	1.01078
216	Protein of unknown function, has moderate similarity to a region of carbon catabolite repressor negative regulator of transcription complex subunit 2 (human CNOT2), which is a component of the CCR4-NOT global transcriptional regulator complex	2	B0286.4	B0286.4	B0286.4	4123	130	3993	2253	199	2054	2714	239	2475	0	1.613	0.689746
217	Protein with moderate similarity to phospholipid scramblase 2 (mouse Plscr2), which mediates the calcium-dependent transbilayer movement of phospholipids and may be responsible for the redistribution of membrane phospholipids in damaged or apoptotic cells	1	ZK1053.5	ZK1053.5	ZK1053.5	291	129	162	259	199	60	312	239	73	0	2.219	1.14991
218	Protein with high similarity to galactose-1-phosphate uridylyltransferase (human GALT), which catalyzes the conversion of UDP-glucose and galactose-1-phosphate to glucose-1-phosphate and UDP-galactose and is associated with galactosemia	3	ZK1058.3	ZK1058.3	ZK1058.3	767	124	643	600	202	398	722	243	479	0	1.342	0.424385
219	Protein of unknown function	3	ZK1058.9	ZK1058.9	ZK1058.9	1750	124	1626	1600	207	1393	1927	249	1678	0	0.969	-0.0454314
220	Member of the oxysterol-binding protein (OSBP) family, which are involved in sterol biosynthesis, contains a pleckstrin homology (PH) domain, has a region of moderate similarity to S. cerevisiae Osh7p, which functions in sterol metabolism	X	ZK1086.1	ZK1086.1	ZK1086.1	1142	127	1015	976	211	765	1175	254	921	0	1.102	0.140124
221		2		multiple	ZK1127.1	1200	123	1077	886	212	674	1067	255	812	0	1.326	0.407081
222		X		multiple	ZK1193.2	345	121	224	273	218	55	328	262	66	0	3.394	1.76299
223	Protein with composite TRIAD zinc finger domain, has similarity to human Hs.78894 gene product, protein KIAA0161 isolated from human cell line KG-1 cDNA library, and D. melanogaster ARI2	X	C17H11.6	C17H11.6	C17H11.6	928	128	800	560	224	336	674	269	405	0	1.975	0.981853
224	Protein of unknown function, has high similarity to uncharacterized C. elegans F08G5.6	4	C17H12.8	C17H12.8	C17H12.8	2835	127	2708	1415	231	1184	1704	278	1426	0	1.899	0.92524
225	Protein of unknown function, has low similarity to uncharacterized C. elegans W01D2.5	2	C18A3.4	C18A3.4	C18A3.4	792	123	669	728	238	490	877	286	591	0	1.132	0.178874
226	Protein containing one helix-loop-helix DNA-binding domain, which mediate protein dimerization	2	C18A3.8	C18A3.8	C18A3.8	248	120	128	269	242	27	324	291	33	0	3.879	1.95568
227	Protein of unknown function, has moderate similarity to uncharacterized C. elegans C18B2.2	X	C18B2.1	C18B2.1	C18B2.1	249	122	127	329	251	78	396	302	94	0	1.351	0.434028
228	Member of the 7-transmembrane chemoreceptor family of G protein-coupled receptors (GPCR), has low similarity to C. elegans ODR-10, which is a G protein-coupled receptor involved in odorant response	5	C18B10.7	C18B10.7	C18B10.7	197	135	62	215	261	-46	259	314	-55	0
229	Protein of unknown function	5	D1086.4	D1086.4	D1086.4	835	135	700	1322	263	1059	1592	316	1276	0	0.549	-0.865122
230	Protein with strong similarity to human eukaryotic translation initiation factor 3, subunit 5 (EIF3S5)	2	D2013.7	D2013.7	D2013.7	2636	135	2501	2132	263	1869	2568	316	2252	0	1.111	0.151859
231	Protein of unknown function	4	D2024.4	D2024.4	D2024.4	318	138	180	274	272	2	330	327	3	0	60	5.90689
232	Member of the 7-transmembrane chemoreceptor family of G protein-coupled receptors (GPCR), has very strong similarity to uncharacterized C. elegans SRI-39	2	D2062.8	D2062.8	D2062.8	246	154	92	264	285	-21	318	343	-25	0
233		2		multiple	D2089.1	1507	153	1354	1106	288	818	1332	346	986	0	1.373	0.457332
234	Member of the reverse transcriptase family, which are RNA-dependent DNA polymerases	1	CeTERT/DY3.4	DY3.4	DY3.4	781	130	651	874	284	590	1053	342	711	0	0.916	-0.12658
235	Protein of unknown function	2	F07F6.2	F07F6.2	F07F6.2	355	110	245	431	89	342	519	107	412	0	0.595	-0.749038
236	Member of the 7-transmembrane chemoreceptor family of G protein-coupled receptors (GPCR), has a region of weak similarity to C. elegans ODR-10, which is a G protein-coupled receptor involved in odorant response	5	srj-32/F07G11.5	F07G11.5	F07G11.5	366	112	254	157	89	68	189	107	82	0	3.098	1.63134
237	Member of an uncharacterized protein family	1	F08A8.5	F08A8.5	F08A8.5	258	113	145	164	86	78	197	103	94	0	1.543	0.625738
238	CTP:phosphocholine cytidyltransferase	X	CCt/F08C6.2	F08C6.2	F08C6.2	2209	115	2094	1120	85	1035	1349	102	1247	0	1.679	0.747602
239	Protein of unknown function	2	F08D12.12	F08D12.12	F08D12.12	572	110	462	303	92	211	365	110	255	0	1.812	0.857583
240	NADH pyrophosphatase	4	F13H10.2	F13H10.2	F13H10.2	1211	112	1099	928	107	821	1118	128	990	0	1.11	0.15056
241	Protein containing an F-box domain, which serve as a link between a target protein and a ubiquitin-conjugating enzyme	X	F43C9.1	F43C9.1	F43C9.1	339	127	212	328	150	178	395	180	215	0	0.986	-0.0203404
242	Weakly similar to D. melanogaster coracle;predicted to be membrane spanning	3	F43D9.1	F43D9.1	F43D9.1	485	139	346	315	193	122	379	232	147	0	2.354	1.23511
243	Protein with a putative RING-type zinc finger domain, has moderate similarity to C. elegans Y6D1A.B	2	F43G6.8	F43G6.8	F43G6.8	2797	135	2662	2441	198	2243	2940	238	2702	0	0.985	-0.0218044
244	Protein of unknown function	1	F43G9.4	F43G9.4	F43G9.4	1741	124	1617	1776	199	1577	2139	239	1900	0	0.851	-0.232769
245	Protein with moderate similarity to nucleobindin 2 (mouse Nucb2), which is a calcium binding protein that may play a role in calcium ion homeostasis	X	F44A6.1	F44A6.1	F44A6.1	1567	127	1440	1380	203	1177	1662	244	1418	0	1.016	0.0229004
246	Protein of unknown function	3	F44B9.2	F44B9.2	F44B9.2	1279	129	1150	929	208	721	1119	250	869	0	1.323	0.403813
247	Protein of unknown function	X	F47B7.7	F47B7.7	F47B7.7	1170	126	1044	741	209	532	892	251	641	0	1.629	0.703987
248	Protein containing a nuclear hormone receptor C4-type zinc finger domain, which bind DNA and may be involved in regulation of transcription, and a nuclear hormone receptor ligand-binding domain, has low similarity to C. elegans NHR-51	5	F47C10.1	F47C10.1	F47C10.1	195	125	70	201	212	-11	242	255	-13	0
249	Member of the nuclear hormone receptor/Zinc finger protein family	5	F47C10.8	F47C10.8	F47C10.8	314	130	184	285	216	69	343	260	83	0	2.217	1.14861
250	Member of the 7-transmembrane chemoreceptor family of G protein-coupled receptors (GPCR), has high similarity to uncharacterized C. elegans F47C12.10	4	F47C12.5	F47C12.5	F47C12.5	241	124	117	273	225	48	328	271	57	0	2.053	1.03773
251	Protein containing a DUF32 domain of unknown function, has very strong similarity to uncharacterized C. elegans F47D2.7	5	F47D2.1	F47D2.1	F47D2.1	300	126	174	281	234	47	338	281	57	0	3.053	1.61023
252	Protein containing a DUF32 domain of unknown function, has strong similarity to uncharacterized C. elegans F47D2.5	5	F47D2.6	F47D2.6	F47D2.6	204	129	75	207	238	-31	249	286	-37	0
253	Protein containing a Src homology 3 (SH3) domain, which bind proline-rich peptides, and a protein kinase domain, has a region of low similarity to a region of human MAP3K9, which is an apoptosis activator involved in the JNK cascade	5	K11D12.10	K11D12.10	K11D12.10	777	137	640	631	253	378	760	304	456	0	1.404	0.489543
254	Dicarboxylate carrier protein, member of the mitochondrial carrier (MCF) protein family	X	K11G12.5	K11G12.5	K11G12.5	2422	142	2280	1297	261	1036	1562	314	1248	0	1.827	0.869477
255	Protein containing two GYF (glycine, tyrosine, phenylalanine) domains, which are proline-binding domains	3	K11H3.4	K11H3.4	K11H3.4	671	140	531	547	261	286	659	314	345	0	1.539	0.621993
256	Protein of unknown function	4	K11H12.5	K11H12.5	K11H12.5	319	137	182	329	265	64	396	319	77	0	2.364	1.24123
257	Protein containing a forkhead associated (FHA) domain, which bind phosphopeptides	4	M4.1	M4.1	M4.1	636	145	491	478	273	205	575	328	247	0	1.988	0.991318
258	Member of the 7-transmembrane chemoreceptor family of G protein-coupled receptors (GPCR), has low similarity to C. elegans ODR-10, which is involved in odorant response	4	str-3/M7.13	M7.13	M7.13	288	153	135	490	278	212	590	334	256	0	0.527	-0.924125
259	Protein containing a UDP-glucoronosyl and UDP-glucosyl transferase domain, has low similarity to UDP glycosyltransferase 2 family polypeptide B7 (human UGT2B7), which glucuronidates androgens, retinoids, lipids, and specific drugs	3	M88.1	M88.1	M88.1	899	153	746	1107	281	826	1333	338	995	0	0.75	-0.415037
260	Protein containing two collagen triple helix repeats, which are found in some extracellular proteins, and a nematode cuticle collagen N-terminal domain, has a region of moderate similarity to a region of collagen type XI alpha 2 subunit (human COL11A2)	2	M110.1	M110.1	M110.1	1249	147	1102	1654	285	1369	1992	343	1649	0	0.668	-0.58208
261	Protein of unknown function, has high similarity to uncharacterized C. elegans K09H9.4	2	M110.6	M110.6	M110.6	593	115	478	515	85	430	620	102	518	0	0.923	-0.115597
262	Putative ortholog of C. elegans M151.6 gene product	2	M151.5	M151.5	M151.5	360	117	243	230	82	148	277	98	179	0	1.358	0.441483
263	Protein with weak similarity to C. elegans tra-1, which is a zinc-finger transcription factor involved in sex determination	X	M163.2	M163.2	M163.2	295	112	183	163	78	85	196	93	103	0	1.777	0.829444
264	Protein of unknown function	2	M176.5	M176.5	M176.5	277	115	162	172	77	95	207	92	115	0	1.409	0.494672
265	Putative ortholog of C. elegans T17H7.5 gene product	3	T17H7.4	T17H7.4	T17H7.4	1833	112	1721	1084	84	1000	1306	101	1205	0	1.428	0.513996
266	Member of the zinc finger, C4 type (two domains) protein family, involved in AWA-mediated chemosensation of volatile odorants	X	odr-7/T18D3.2	T18D3.2	T18D3.2	249	117	132	199	101	98	239	121	118	0	1.119	0.16221
267	Protein of unknown function	5	T18H9.6	T18H9.6	T18H9.6	1720	123	1597	1426	129	1297	1718	155	1563	0	1.022	0.0313952
268	Protein containing two N- and one C-terminal lipopolysaccharide-binding protein, bactericidal permeability-increasing protein, or cholesteryl ester transfer protein domains, has weak similarity to lipopolysaccharide (LPS)-binding protein (human LBP)	3	T19C3.5	T19C3.5	T19C3.5	951	125	826	582	152	430	701	183	518	0	1.595	0.673556
269	Protein of unknown function	5	T19C4.5	T19C4.5	T19C4.5	758	129	629	742	181	561	893	218	675	0	0.932	-0.101598
270	Protein containing an extracellular laminin G domain, has weak similarity to a region of agrin (rat Agrn), which is a proteoglycan component of the basal lamina that stimulates acetylcholine receptor aggregation through the activation of rat Nsk1	2	T19D12.6	T19D12.6	T19D12.6	2517	124	2393	2349	196	2153	2830	236	2594	0	0.923	-0.115597
271	Protein containing a protein kinase domain, has low similarity to a region of fibroblast growth factor receptor 1 (mouse Fgfr1), which is a fibroblast growth factor receptor tyrosine kinase that is involved in cell proliferation and organ development	4	T22B11.3	T22B11.3	T22B11.3	316	127	189	257	201	56	309	242	67	0	2.821	1.49621
272	Member of the hyaluronidase family of glycosyl hydrolases, which hydrolyze glycosidic bonds, has low similarity to hyaluronidase 1 (mouse Hyal1), which degrades hyaluronan	2	T22C8.2	T22C8.2	T22C8.2	776	132	644	676	205	471	814	246	568	0	1.134	0.181421
273	Member of the rhodopsin family of G-protein coupled receptors (GPCR), has low similarity to pancreatic polypeptide receptor Y4 (human PPYR1), which is a neuropeptide Y receptor that inhibits adenylyl cyclase and stimulates intracellular calcium flux	4	T22D1.12	T22D1.12	T22D1.12	617	129	488	471	213	258	567	256	311	0	1.569	0.649845
274	Member of the 7-transmembrane chemoreceptor family of G-protein coupled receptors (GPCR), has high similarity to uncharacterized C. elegans T22F3.6	5	T22F3.5	T22F3.5	T22F3.5	480	132	348	396	213	183	477	256	221	0	1.575	0.655352
275	Member of the sugar (and other) transporter family, has weak similarity to solute carrier family 17 member 1 (human SLC17A1), which is involved in sodium-dependent phosphate transport and mediates organic anion transport at the renal apical membrane	5	T22F3.7	T22F3.7	T22F3.7	402	138	264	377	215	162	454	259	195	0	1.354	0.437228
276	Protein of unknown function, has high similarity to uncharacterized C. elegans R03H4.7	5	T22G5.4	T22G5.4	T22G5.4	326	143	183	404	222	182	486	267	219	0	0.836	-0.258425
277	Protein of unknown function	X	F21A10.4	F21A10.4	F21A10.4	301	135	166	252	228	24	303	274	29	0	5.724	2.51702
278	Member of the acyl-CoA oxidase family, which convert acyl-CoA into trans-2-enoyl-CoA, has moderate similarity to peroxisomal acyl-coenzyme A oxidase (rat RATACOA1), which catalyzes the first step in very long chain fatty acid beta-oxidation	5	F25C8.1	F25C8.1	F25C8.1	276	133	143	219	234	-15	263	281	-18	0
279	Protein of unknown function	5	F25C8.3	F25C8.3	F25C8.3	703	140	563	442	247	195	532	297	235	0	2.396	1.26063
280		5		F26D2.8	F26D2.8	327	137	190	220	261	-41	265	314	-49	0
281	Protein containing a WSN domain of unknown function, an ankyrin (Ank) repeat, which may mediate protein-protein interactions, and a BRCA1 (breast cancer type 1) C terminus (BRCT) domain, has high similarity to uncharacterized C. elegans F36D3.5	5	F26D2.10	F26D2.10	F26D2.10	199	136	63	220	261	-41	265	314	-49	0
282	Member of an uncharacterized protein family	5	F26D2.14	F26D2.14	F26D2.14	222	136	86	231	264	-33	278	318	-40	0
283	S-adenosylmethionine decarboxylase	1	smd-1/sam-1/samdc/F47G4.7	F47G4.7	F47G4.7	1169	142	1027	634	274	360	763	330	433	0	2.372	1.2461
284	Member of the protein-tyrosine phosphatase family, which are involved in control of cell growth, proliferation, and differentiation, has a region of low similarity to a region of human PTPN9, which is a non-receptor type protein tyrosine phosphatase	5	F48F5.1	F48F5.1	F48F5.1	299	147	152	298	278	20	359	334	25	0	6.08	2.60407
285	Protein containing a DUF216 domain of unknown function, has high similarity to uncharacterized C. elegans Y102A5C.33	5	F49H6.10	F49H6.10	F49H6.10	179	154	25	242	278	-36	291	334	-43	0
286	Protein with high similarity to phosphomannomutase 2 (human PMM2), which participates in synthesis of the GDP-mannose required for protein glycosylation by converting mannose-1-phosphate to mannose-6-phosphate	4	F52B11.2	F52B11.2	F52B11.2	363	158	205	525	282	243	632	339	293	0	0.7	-0.514573
287	Protein with high similarity to C. elegans SQT-3, which is a collagen, contains two collagen triple helix repeats, which are found in some extracellular proteins, and a nematode cuticle collagen N-terminal domain	4	F52B11.4	F52B11.4	F52B11.4	8517	126	8391	7665	89	7576	9234	107	9127	0	0.919	-0.121863
288	Member of the impB, mucB or samB family, which are involved in UV protection, has moderate similarity to a region of DNA polymerase eta (human POLH), which is a low fidelity and low processivity DNA polymerase	3	F53A3.2	F53A3.2	F53A3.2	1665	112	1553	761	81	680	916	97	819	0	1.896	0.922959
289	Protein containing a protein kinase domain, has a region of low similarity to a region of glycogen synthase kinase-3 beta (mouse Gsk3b), which is a serine threonine protein kinase that is involved in embryonic development	1	Y106G6D.4	Y106G6D.4	Y106G6D.4	487	112	375	303	79	224	365	95	270	0	1.389	0.474047
290	Protein containing an RNA recognition motif (RRM, RBD, or RNP), has weak similarity to uncharacterized human RBM12	1	Y106G6D.7	Y106G6D.7	Y106G6D.7	1089	114	975	674	71	603	812	85	727	0	1.341	0.423309
291	Protein of unknown function, has high similarity to uncharacterized C. elegans F47G4.2	1	ZC334.5	ZC334.5	ZC334.5	468	115	353	259	76	183	312	91	221	0	1.597	0.675364
292	Member of the 7-transmembrane chemoreceptor family of G-protein coupled receptors (GPCR), has high similarity to uncharacterized C. elegans ZK262.11	5	ZK262.1	ZK262.1	ZK262.1	198	117	81	113	93	20	136	112	24	0	3.375	1.75489
293	Putative ortholog of C. elegans C03A7.2 gene product	5	ZK262.8	ZK262.8	ZK262.8	324	121	203	281	123	158	338	148	190	0	1.068	0.0949116
294	Member of the domain of unknown function DUF13 family, has high similarity to uncharacterized C. elegans E03H4.2	1	ZK1025.3	ZK1025.3	ZK1025.3	486	120	366	508	126	382	612	151	461	0	0.794	-0.332789
295	Beta-catenin required for body elongation and normal leading-cell migration and adhesion during embryonic ventral closure	1	hmp-2/K05C4.6	K05C4.6	K05C4.6	1554	126	1428	891	140	751	1073	168	905	0	1.578	0.658097
296	Protein containing a leucine rich repeat, which mediate protein-protein interactions, has weak similarity to C. elegans ZYG-11, which is required for zygote formation	1	K05C4.9	K05C4.9	K05C4.9	508	126	382	409	187	222	492	225	267	0	1.431	0.517024
297	Protein containing two DUF23 domains of unknown function, has high similarity to uncharacterized C. elegans C13A2.6	5	K08D9.6	K08D9.6	K08D9.6	345	131	214	257	199	58	309	239	70	0	3.057	1.61212
298	Putative ortholog of C. elegans F17B5.1 gene product	1	T05F1.11	T05F1.11	T05F1.11	1224	135	1089	2565	203	2362	3090	244	2846	0	0.383	-1.38458
299	Member of the mitochondrial carrier protein family of membrane transporters, has moderate similarity to mitochondrial import receptor (S. cerevisiae Mir1p), which is a phosphate transporter	1	T05F1.8	T05F1.8	T05F1.8	469	133	336	553	214	339	666	257	409	0	0.822	-0.28279
300		2		T10D4.2	T10D4.2	449	137	312	437	216	221	526	260	266	0	1.173	0.230203
301	Member of the sulfotransferase family, has moderate similarity to heparan sulfate D-glucosaminyl 3-O-sulfotransferase (human HS3ST1), which is a key enzyme in biosynthesis of the anticoagulant form of heparan sulfate	2	F40H3.5	F40H3.5	F40H3.5	392	140	252	436	219	217	525	263	262	0	0.962	-0.0558912
302	Protein of unknown function, has moderate similarity to uncharacterized axonemal dynein light intermediate chain (human P28)	X	F41G4.1	F41G4.1	F41G4.1	400	142	258	449	226	223	540	272	268	0	0.963	-0.0543923
303	Protein of unknown function, has strong similarity to uncharacterized C. elegans Y55H10A.2	4	F42A6.1	F42A6.1	F42A6.1	287	143	144	252	226	26	303	272	31	0	4.645	2.21568
304	Member of the protein-tyrosine phosphatase family, which are involved in control of cell growth, proliferation, differentiation and transformation	4	F42C5.5	F42C5.5	F42C5.5	256	135	121	390	229	161	469	275	194	0	0.624	-0.680382
305	Protein containing two immunoglobulin (Ig) domains, which may be involved in protein-protein and protein-ligand interactions, has moderate similarity to uncharacterized C. elegans ZIG-3	X	zig-2/F42F12.2	F42F12.2	F42F12.2	311	134	177	385	242	143	463	291	172	0	1.029	0.041243
306	Protein of unknown function	X	F43B10.1	F43B10.1	F43B10.1	407	132	275	379	259	120	456	312	144	0	1.91	0.933573
307	Member of the rhodopsin family of G protein-coupled receptors (GPCR), has low similarity to somatostatin receptor 5 (rat Sstr5), which suppresses adenylyl cyclase and mediates the inhibition of cell proliferation and secretion of pituitary growth hormone	X	uvt-6/F56B6.5	F56B6.5	F56B6.5	381	137	244	333	262	71	401	315	86	0	2.837	1.50437
308	Protein with low similarity to activator of basal transcription 1 (mouse Abt1), which is a single- and double-stranded DNA binding protein that interacts with TATA-binding protein (Tbp) and functions as a basal transcriptional activator of class II genes	1	F57B10.8	F57B10.8	F57B10.8	249	141	108	419	262	157	504	315	189	0	0.571	-0.808437
309	Protein of unknown function	5	F57F5.3	F57F5.3	F57F5.3	446	141	305	464	272	192	559	327	232	0	1.315	0.395063
310	Member of the C. elegans Sre G protein-coupled chemoreceptor family, which are putative chemosensory receptors, has high similarity to uncharacterized C. elegans W05H5.6	2	F57G9.4	F57G9.4	F57G9.4	226	145	81	369	277	92	444	333	111	0	0.73	-0.454032
311	Protein of unknown function, has weak similarity to C. elegans W06B11.1	4	F57H12.7	F57H12.7	F57H12.7	1248	148	1100	1235	280	955	1487	337	1150	0	0.957	-0.0634092
312	Protein containing a formin homology 2 domain, which are found in proteins that control rearrangements of the actin cytoskeleton, has a region of low similarity to a region of diaphanous homolog 1 (mouse Diap1), which induces focal contact formation	3	F58B6.2	F58B6.2	F58B6.2	354	142	212	556	285	271	669	343	326	0	0.65	-0.621488
313	Protein of unknown function	X	C14E2.3	C14E2.3	C14E2.3	118	117	1	134	92	42	161	110	51	0	0.02	-5.64386
314	Member of the dTDP-4-dehydrorhamnose 3,5-epimerase family, which catalyze isomerisation in lipopolysaccharide biosynthesis	X	C14F11.6	C14F11.6	C14F11.6	1653	119	1534	980	86	894	1180	103	1077	0	1.424	0.509949
315	Protein of unknown function	X	C15A7.3	C15A7.3	C15A7.3	291	111	180	175	79	96	210	95	115	0	1.565	0.646163
316	Protein of unknown function	X	C15C7.3	C15C7.3	C15C7.3	175	115	60	115	71	44	138	85	53	0	1.132	0.178874
317	Protein of unknown function	X	C15H9.10	C15H9.10	C15H9.10	1106	120	986	1199	74	1125	1444	89	1355	0	0.728	-0.45799
318	Protein of unknown function, has weak similarity to C. elegans K11H12.7	X	C15H9.9	C15H9.9	C15H9.9	2869	118	2751	2499	87	2412	3010	104	2906	0	0.947	-0.0785637
319	Protein of unknown function	2	C17G10.7	C17G10.7	C17G10.7	169	122	47	211	108	103	254	130	124	0	0.379	-1.39973
320	Protein of unknown function, has high similarity to a region of ariadne ubiquitin-conjugating enzyme E2-binding protein homolog 1 (human ARIH1), which binds ubiquitin-conjugating enzyme E2-18 (human UBE2L3) and may play a role in protein ubiquitylation	X	C17H11.4	C17H11.4	C17H11.4	1930	128	1802	1061	120	941	1278	144	1134	0	1.589	0.668119
321	Protein of unknown function, has weak similarity to C. elegans T24C4.3	X	C18A11.1	C18A11.1	C18A11.1	3447	125	3322	3376	139	3237	4067	167	3900	0	0.852	-0.231075
322	Protein of unknown function, has weak similarity to C. elegans ZC581.6	2	C18A3.7	C18A3.7	C18A3.7	225	127	98	377	173	204	454	208	246	0	0.398	-1.32916
323	Protein of unknown function	X	C18B12.1	C18B12.1	C18B12.1	236	133	103	313	193	120	377	232	145	0	0.71	-0.494109
324	Protein with strong similarity to C. elegans F28B1.6 gene product	5	C18D4.3	C18D4.3	C18D4.3	302	138	164	172	201	-29	207	242	-35	0
325	Protein of unknown function, has high similarity to uncharacterized C. elegans T27C5.8	5	F49H6.13	F49H6.13	F49H6.13	450	134	316	196	209	-13	236	251	-15	0
326	Protein of unknown function, has high similarity to uncharacterized C. elegans T27C5.8	5	F49H6.3	F49H6.3	F49H6.3	414	139	275	164	216	-52	197	260	-63	0
327	Protein with high similarity to glycine cleavage system protein H (human GCSH), which is the H-protein component of the glycine cleavage system that is associated with atypical nonketotic hyperglycinemia, member of the glycine cleavage H-protein family	1	F52A8.5	F52A8.5	F52A8.5	1022	142	880	1062	222	840	1279	267	1012	0	0.87	-0.200913
328	Protein containing a BTB (BR-C, ttk and babor) or POZ (Pox virus and zinc finger) domain, which are found in some DNA and actin binding proteins, and a meprin and TRAF homology (MATH) domain, has high similarity to uncharacterized C. elegans F40B1.1	2	F52C6.1	F52C6.1	F52C6.1	473	139	334	447	230	217	538	277	261	0	1.28	0.356144
329	Protein containing a meprin and TRAF homology (MATH) domain	2	F52C6.6	F52C6.6	F52C6.6	265	139	126	203	232	-29	244	279	-35	0
330	Protein of unknown function	X	F52D2.5	F52D2.5	F52D2.5	303	138	165	249	235	14	300	283	17	0	9.706	3.27888
331	Protein containing an MYND finger domain, has moderate similarity to a region of adenovirus 5 E1A binding protein (human BS69), which represses human MYB and adenovirus E1A-activated transcription	X	bra-1/F54B11.6	F54B11.6	F54B11.6	545	136	409	449	246	203	540	296	244	0	1.676	0.745022
332	Protein of unknown function, has strong similarity to uncharacterized C. elegans M01B2.8	5	F54B8.1	F54B8.1	F54B8.1	463	132	331	582	259	323	701	312	389	0	0.851	-0.232769
333	Protein with moderate similarity to C. elegans F59C6.3 gene product	1	F54C1.8	F54C1.8	F54C1.8	243	141	102	512	263	249	616	316	300	0	0.34	-1.55639
334	Protein with high similarity to ADP-ribosylation factor 1 (rat Arl1), which is a GTP-binding protein and putative GTPase that may be involved in intracellular protein transport, member of the ADP-ribosylation factor (ARF) family	2	F54C9.10	F54C9.10	F54C9.10	1843	141	1702	1782	266	1516	2146	320	1826	0	0.932	-0.101598
335	Protein of unknown function, has moderate similarity to C. elegans F54D12.7	2	F54D12.1	F54D12.1	F54D12.1	213	144	69	211	276	-65	254	332	-78	0
336	Protein of unknown function	2	F54D12.4	F54D12.4	F54D12.4	641	147	494	733	279	454	883	336	547	0	0.903	-0.147202
337	Protein of unknown function	2	Y54E2A.4	Y54E2A.4	Y54E2A.4	188	145	43	337	280	57	406	337	69	0	0.623	-0.682696
338	Protein of unknown function, has moderate similarity to uncharacterized C. albicans Orf6.8403p	1	Y54E5A.5	Y54E5A.5	Y54E5A.5	1872	135	1737	1295	287	1008	1560	345	1215	0	1.43	0.516015
339	Protein containing an RNA recognition motif (RRM, RBD, or RNP), has a region of moderate similarity to a region of splicing factor arginine serine rich 7 (human SFRS7), which is a splicing factor of the SR protein family	4	Y57G11A.5	Y57G11A.5	Y57G11A.5	339	119	220	279	101	178	336	121	215	0	1.023	0.0328061
340	Protein containing two CCCH-type zinc finger domains, which bind DNA or RNA, has a region of high similarity to a region of C. elegans POS-1, which is a zinc-finger protein involved in regulation of early morphogenesis	4	Y57G11C.25	Y57G11C.25	Y57G11C.25	560	121	439	413	96	317	497	115	382	0	1.149	0.200379
341	Protein of unknown function, has high similarity to uncharacterized C. elegans C06C6.8	2	Y57G7A.3	Y57G7A.3	Y57G7A.3	319	119	200	228	85	143	274	102	172	0	1.163	0.217851
342	Member of the transthyretin-like family, has high similarity to uncharacterized C. elegans Y5F2A.1	4	Y5F2A.2	Y5F2A.2	Y5F2A.2	3937	119	3818	4881	76	4805	5880	91	5789	0	0.66	-0.599462
343	Protein of unknown function, has high similarity to uncharacterized C. elegans ZC334.2	1	ZC334.3	ZC334.3	ZC334.3	928	121	807	381	76	305	459	91	368	0	2.193	1.13291
344	Protein with low similarity to S. pombe Wos2p, which regulates Wee1p and Cdc2p in the cell cycle	3	ZC395.10	ZC395.10	ZC395.10	4633	120	4513	3066	93	2973	3693	112	3581	0	1.26	0.333424
345	Protein of unknown function, has moderate similarity to uncharacterized C. elegans ZC412.3	5	ZC412.4	ZC412.4	ZC412.4	762	123	639	550	122	428	662	146	516	0	1.238	0.308011
346	Protein with strong similarity to C. elegans H12D21.2 gene product	5	ZC412.9	ZC412.9	ZC412.9	436	129	307	619	142	477	745	171	574	0	0.535	-0.902389
347	Protein of unknown function	5	ZC443.2	ZC443.2	ZC443.2	719	128	591	576	151	425	693	181	512	0	1.154	0.206643
348	Protein of unknown function	4	ZC477.4	ZC477.4	ZC477.4	234	127	107	250	169	81	301	203	98	0	1.092	0.126973
349	Protein of unknown function, has moderate similarity to C. elegans C30B5.7	2	F09C12.6	F09C12.6	F09C12.6	284	131	153	220	182	38	265	219	46	0	3.326	1.73379
350	Protein of unknown function, has strong similarity to C. elegans F40H7.4	5	F09C6.1	F09C6.1	F09C6.1	371	137	234	221	195	26	266	234	32	0	7.313	2.87046
351	Protein of unknown function, has strong similarity to C. elegans GRD-5	4	grd-10/F09D12.1	F09D12.1	F09D12.1	2397	139	2258	1115	206	909	1343	248	1095	0	2.062	1.04404
352	Protein of unknown function	4	F19C7.6	F19C7.6	F19C7.6	638	142	496	549	215	334	661	259	402	0	1.234	0.303342
353	Protein of unknown function	5	F19F10.7	F19F10.7	F19F10.7	217	142	75	191	222	-31	230	267	-37	0
354	Protein containing a PAZ (Piwi, Argonaut and Zwille) domain, which may mediate protein-protein interactions	X	F19G12.3	F19G12.3	F19G12.3	470	141	329	398	232	166	479	279	200	0	1.645	0.718088
355	Protein of unknown function	X	F22H10.3	F22H10.3	F22H10.3	2938	142	2796	3326	234	3092	4007	281	3726	0	0.75	-0.415037
356	Protein of unknown function	X	F23A7.4	F23A7.4	F23A7.4	2140	143	1997	1391	238	1153	1675	286	1389	0	1.438	0.524064
357	Protein containing two PDZ, DHR, or GLGF domains, has weak similarity to solute carrier family 9 isoform 3 regulatory factor 1 (sodium-hydrogen exchanger-regulatory factor, human LOC59114), which is a cytoskeleton-linking protein	4	C01F6.6	C01F6.6	F23B2.2	885	140	745	852	252	600	1026	303	723	0	1.03	0.0426443
358	Protein with strong similarity to C. elegans F23B2.8 gene product	4	F23B2.9	F23B2.9	F23B2.9	403	133	270	399	259	140	480	312	168	0	1.607	0.68437
359	Protein of unknown function	2	F23F1.4	F23F1.4	F23F1.4	1020	144	876	903	271	632	1087	326	761	0	1.151	0.202888
360	Protein of unknown function	3	F23F12.2	F23F12.2	F23F12.2	2678	149	2529	2462	272	2190	2966	327	2639	0	0.958	-0.0619024
361	Protein with high similarity to C. elegans R05H5.3, which is a putative nuclear thioredoxin involved in embryogenesis and morphogenesis	5	T20D4.7	T20D4.7	T20D4.7	487	151	336	643	284	359	774	342	432	0	0.778	-0.362158
362	Putative beta-type subunit of 20S proteasome particle	1	pbs-4/T20F5.2	T20F5.2	T20F5.2	2290	147	2143	1572	286	1286	1893	344	1549	0	1.383	0.467801
363		X		T20F7.4	T20F7.4	299	142	157	360	286	74	433	344	89	0	1.764	0.818851
364	Protein of unknown function, has moderate similarity to C. elegans T20G5.7	3	T20G5.8	T20G5.8	T20G5.8	411	133	278	696	292	404	838	351	487	0	0.571	-0.808437
365	Protein containing one C. elegans C-terminal C6 domain, which contain conserved cysteine residues, has moderate similarity to uncharacterized C. elegans R07B1.5	2	T21B4.3	T21B4.3	T21B4.3	310	116	194	153	97	56	184	116	68	0	2.853	1.51248
366		3		AF303261-1.T21C12	T21C12.3	582	117	465	266	96	170	320	115	205	0	2.268	1.18142
367	Protein of unknown function	3	T23G5.3	T23G5.3	T23G5.3	485	121	364	328	93	235	395	112	283	0	1.286	0.362891
368		n		no_pcr	T23H2.6	166	117	49	140	84	56	168	101	67	0	0.731	-0.452057
369	Protein of unknown function containing a Ground-like domain, has strong similarity to C. elegans F40C5.F	5	T24A6.15	T24A6.15	T24A6.15	587	114	473	322	78	244	387	93	294	0	1.609	0.686164
370	Protein of unknown function, has high similarity to uncharacterized C. elegans C07G3.2	5	T24A6.7	T24A6.7	T24A6.7	260	121	139	228	105	123	274	126	148	0	0.939	-0.0908029
371	Protein of unknown function, has moderate similarity to C. elegans M153.3	X	T24C12.4	T24C12.4	T24C12.4	351	125	226	261	138	123	314	166	148	0	1.527	0.6107
372	Protein of unknown function, has weak similarity to C. elegans C18A11.1	3	T24C4.3	T24C4.3	T24C4.3	381	126	255	289	151	138	348	181	167	0	1.527	0.6107
373	Protein of unknown function, has moderate similarity to uncharacterized C. elegans T20D4.4	5	C04E12.3	C04E12.3	C04E12.3	762	123	639	432	138	294	520	166	354	0	1.805	0.851999
374	Protein of unknown function	5	C04F5.3	C04F5.3	C04F5.3	417	125	292	392	148	244	472	178	294	0	0.993	-0.0101344
375	Protein of unknown function	4	C05B10.2	C05B10.2	C05B10.2	504	129	375	492	175	317	592	210	382	0	0.982	-0.0262051
376		n		no_pcr	C05E4.8	275	141	134	365	199	166	439	239	200	0	0.67	-0.577767
377	Protein of unknown function, has moderate similarity to uncharacterized C. elegans Y43F8B.2	4	C06A12.3	C06A12.3	C06A12.3	749	141	608	649	207	442	781	249	532	0	1.143	0.192825
378	Putative ortholog of C. elegans C06C3.9 gene product	2	C06C3.4	C06C3.4	C06C3.4	551	139	412	556	217	339	669	261	408	0	1.01	0.0143553
379	Protein of unknown function	X	C15B12.6	C15B12.6	C15B12.6	552	137	415	540	225	315	650	271	379	0	1.095	0.130931
380	Protein containing a UPF0086 domain of unknown function, has low similarity to a region of processing of precursor 4 homolog (human POP4), which is a subunit of tRNA processing enzyme ribonuclease P and ribosomal RNA processing enzyme ribonuclease MRP	1	C15C6.4	C15C6.4	C15C6.4	870	136	734	884	237	647	1065	285	780	0	0.941	-0.0877334
381	Member of the G protein alpha subunit family	2	gpa-11/C16A11.1	C16A11.1	C16A11.1	280	134	146	296	236	60	356	284	72	0	2.028	1.02006
382	Protein of unknown function	X	C16B8.4	C16B8.4	3C16B8.4	403	137	266	318	236	82	383	284	99	0	2.687	1.426
383	Member of the animal heme peroxidase family, has low similarity to eosinophil peroxidase (mouse Epx), which plays a role in the production of reactive oxidants that may have cytotoxic effects during the pathogen defense response and inflammation	2	C16C8.2	C16C8.2	C16C8.3	335	135	200	775	250	525	933	301	632	0	0.316	-1.662
384	Protein of unknown function, has high similarity to uncharacterized C. elegans K11C4.1	2	C17C3.11	C17C3.11	C17C3.11	190	140	50	245	256	-11	295	308	-13	0
385	Protein of unknown function	X	F27D9.4	F27D9.4	F27D9.4	282	150	132	245	268	-23	295	322	-27	0
386	Protein of unknown function	X	F28C10.1	F28C10.1	F28C10.1	275	155	120	315	276	39	379	332	47	0	2.553	1.35219
387	Protein of unknown function	3	F28F5.1	F28F5.1	F28F5.1	323	159	164	328	289	39	395	348	47	0	3.489	1.80281
388	Protein with high similarity to GTP cyclohydrolase I (rat Rn.28195/Gch), which is involved in tetrahydrobiopterin synthesis, member of the GTP cyclohydrolase I family, which are involved in formic acid and dihydroneopterin triphosphate biosynthesis	5	F32G8.6	F32G8.6	F32G8.6	2185	152	2033	1889	297	1592	2275	357	1918	0	1.06	0.0840643
389		X		multiple	F35A5.5	244	140	104	256	291	-35	308	350	-42	0
390	YGGWamide neurotransmitter	5	F35B12.7	F35B12.7	F35B12.7	836	135	701	457	290	167	550	349	201	0	3.488	1.8024
391	Protein with strong similarity to C. elegans Y37E11B.10 gene product	5	F43D2.3	F43D2.3	F43D2.3	335	120	215	208	96	112	250	115	135	0	1.593	0.671746
392	Member of the peptide methionine sulfoxide reductase family, which repair damaged proteins, has a region of moderate similarity to a region of methionine sulfoxide reductase A (human MSRA), which reduces methionine sulfoxide residues of damaged proteins	2	F43E2.5	F43E2.5	F43E2.5	939	124	815	703	105	598	846	126	720	0	1.132	0.178874
393	Protein of unknown function	X	F44A6.4	F44A6.4	F44A6.4	1294	118	1176	1094	103	991	1318	124	1194	0	0.985	-0.0218044
394	Protein of unknown function, has weak similarity to C. elegans C15C8.5; may be anchored to the membrane of a secretory vesicle or the Golgi apparatus	4	F44D12.2	F44D12.2	F44D12.2	727	115	612	506	97	409	609	116	493	0	1.241	0.311503
395	Protein of unknown function that may be anchored to the membrane of a secretory vesicle or the Golgi apparatus	2	F44F4.1	F44F4.1	F44F4.1	1167	117	1050	784	105	679	944	126	818	0	1.284	0.360645
396	Protein containing a DUF130 domain of unknown function	2	F45C12.9	F45C12.9	F45C12.9	187	123	64	132	134	-2	159	161	-2	0
397	Protein of unknown function, has high similarity to uncharacterized C. elegans Y53G8AM.5	4	T20D3.2	T20D3.2	5T20D3.2	3936	128	3808	3413	153	3260	4112	184	3928	0	0.969	-0.0454314
398	Member of an uncharacterized protein family	5	T20D4.12	T20D4.12	T20D4.12	364	124	240	678	160	518	816	192	624	0	0.385	-1.37707
399	Protein contains a putative coiled-coil domain, has weak similarity to C. elegans myo-3 gene product [A/Band-1/myosin/K12F2.1 Sarcomeric myosin heavy chain, minor component required for thick filaments in body-wall muscle]	1	T20F10.2	T20F10.2	T20F10.2	1379	121	1258	1337	158	1179	1610	190	1420	0	0.886	-0.174621
400	Protein containing two C2H2 type zinc finger domains, which bind nucleic acids	3	T20H4.2	T20H4.2	T20H4.2	263	122	141	311	144	167	374	173	201	0	0.701	-0.512514
401	Protein of unknown function	5	T21C9.5	T21C9.5	T21C9.5	1912	125	1787	1702	158	1544	2050	190	1860	0	0.961	-0.0573917
402	Protein containing six GLTT repeat region domains	4	T21D12.6	T21D12.6	T21D12.6	269	128	141	395	194	201	475	233	242	0	0.583	-0.778432
403	Protein containing a C-type lectin domain, which mediate calcium-dependent carbohydrate recognition, has high similarity to uncharacterized C. elegans W04H10.4	2	T27D12.3	T27D12.3	T27D12.3	299	132	167	255	210	45	307	253	54	0	3.093	1.62901
404	Member of the transposase family, which are required for excising and inserting mobile genetic elements, has very strong similarity to uncharacterized C. elegans F44F4.8	4	T27E7.7	T27E7.7	T27E7.7	753	136	617	724	220	504	872	265	607	0	1.016	0.0229004
405	Protein with low similarity to neutral sphingomyelinase (rat Smpd2), which is a magnesium-dependent enzyme that catalyzes sphingomyelin and lyso-platelet activating factor hydrolysis and functions in ceramide synthesis	1	T27F6.6	T27F6.6	T27F6.6	1236	134	1102	751	226	525	904	272	632	0	1.744	0.8024
406	Protein of unknown function, putative paralog of C. elegans C03A7.9	5	T28A11.15	T28A11.15	T28A11.15	191	132	59	209	238	-29	251	286	-35	0
407	Protein containing two DUF19 domains of unknown function, which contain twelve conserved cysteines, has high similarity to uncharacterized C. elegans C17B7.2	5	T28A11.2	T28A11.2	T28A11.2	1240	132	1108	1853	237	1616	2232	285	1947	0	0.569	-0.813499
408	Member of the ion transport family, which include calcium, sodium, and potassium channels, has low similarity to potassium channel subfamily K member 16 (human KCNK16), which is a subunit of a pancreatic 2P domain background potassium channel	3	T28A8.1	T28A8.1	T28A8.1	422	137	285	378	246	132	455	296	159	0	1.792	0.841571
409	Protein with similarity to class A and B vertebrate Ephrins; it interacts with and weakly activates the VAB-1 receptor tyrosine kinase	X	efn-3/F15A2.5	F15A2.5	F15A2.5	261	140	121	255	250	5	307	301	6	0	20.167	4.33392
410	Protein of unknown function, has high similarity to uncharacterized C. elegans F38A5.7	4	F15B10.3	F15B10.3	F15B10.3	705	141	564	452	255	197	544	307	237	0	2.38	1.25096
411	Protein of unknown function, has weak similarity to C. elegans F15E6.8	4	F15E6.4	F15E6.4	F15E6.4	251	148	103	292	271	21	351	326	25	0	4.12	2.04264
412	Protein with low similarity to anaphase promoting complex (APC) subunit 10 (human APC10), which regulates mitotic G1-S transition and may target human CDK2 for proteasome-mediated degradation and is associated with malignant oral tumors	5	apc-10/F15H10.3	F15H10.3	F15H10.3	1041	151	890	1065	272	793	1283	327	956	0	0.931	-0.103147
413	Member of the C-type lectin family	1	F17B5.5	F17B5.5	F17B5.5	190	149	41	239	280	-41	287	337	-50	0
414	Protein of unknown function	2	F19B10.6	F19B10.6	F19B10.6	198	149	49	264	292	-28	318	351	-33	0
415	Protein with high similarity to ubiquitin-conjugating E2 enzyme variant 2 (human UBE2V2), which may regulate differentiation, member of the ubiquitin-conjugating enzyme (E2) family, which catalyze the covalent attachment of ubiquitin to target proteins	1	F39B2.2	F39B2.2	F39B2.2	730	146	584	788	293	495	949	353	596	0	0.98	-0.0291463
416	Protein of unknown function, has high similarity to uncharacterized human LOC51026	2	F41C3.4	F41C3.4	F41C3.4	1291	138	1153	1118	285	833	1346	343	1003	0	1.15	0.201634
417	Cyclophilin-related peptidylprolyl cis-trans-isomerase	3	cyp-6/F42G9.2	F42G9.2	F42G9.2	3795	124	3671	1472	118	1354	1773	142	1631	0	2.251	1.17057
418	Protein of unknown function, has a region of high similarity to DNA directed RNA polymerase II polypeptide D (human POLR2D), which interacts with the RPB7 subunit (POLR2G)	2	F43E2.2	F43E2.2	F43E2.2	892	124	768	717	118	599	863	142	721	0	1.065	0.0908534
419	Protein of unknown function, has high similarity to uncharacterized C. elegans C01G12.3	2	F44G4.5	F44G4.5	F44G4.5	232	119	113	325	115	210	391	138	253	0	0.447	-1.16165
420	Putative ortholog of C. elegans K08D10.8 gene product	1	F46A8.9	F46A8.9	F46A8.9	272	118	154	315	134	181	379	161	218	0	0.706	-0.50226
421	Protein of unknown function	X	C46F2.1	C46F2.1	C46F2.1	266	121	145	251	165	86	302	198	104	0	1.394	0.479231
422	Member of the nucleoside transporter family, which transport nucleosides across the plasma, and possibly nuclear, membrane, has weak similarity to solute carrier family 29 member 1 (rat Slc29a1), which transports nucleosides and nucleoside analog drugs	4	C47A4.2	C47A4.2	C47A4.2	498	122	376	399	168	231	480	202	278	0	1.353	0.436162
423	Protein containing a cytidine deaminase zinc-binding domain, has moderate similarity to cytidine deaminase (human CDA), which deaminates cytidine and deoxycytidine to uridine and deoxyuridine	X	C47D2.2	C47D2.2	C47D2.2	484	123	361	441	174	267	531	209	322	0	1.121	0.164786
424	Protein of unknown function, has low similarity to uncharacterized C. elegans C25B8.5	X	C48C5.3	C48C5.3	C48C5.3	1078	124	954	572	174	398	689	209	480	0	1.988	0.991318
425	Protein of unknown function, has weak similarity to C. elegans F33E2.5	1	C49A1.1	C49A1.1	C49A1.1	940	122	818	848	170	678	1021	204	817	0	1.001	0.00144197
426	Protein containing a C-type lectin domain, which mediate calcium-dependent carbohydrate recognition, has moderate similarity to uncharacterized C. elegans C30H6.4	4	C49C3.13	C49C3.13	C49C3.13	246	121	125	238	160	78	286	192	94	0	1.33	0.411426
427	Protein containing a major sperm protein (MSP) domain, which are involved in sperm motility	3	D2007.2	D2007.2	D2007.2	599	123	476	678	151	527	816	181	635	0	0.75	-0.415037
428	Protein of unknown function	X	D2021.4	D2021.4	D2021.4	571	126	445	625	179	446	753	215	538	0	0.827	-0.274041
429		n		no_pcr	D2062.1	1226	133	1093	847	215	632	1020	259	761	0	1.436	0.522056
430	Putative heterogeneous nuclear ribonucleoprotein (hnRNP), has strong similarity to human polypyrimidine tract binding protein (heterogeneous nuclear ribonucleoprotein I, PTB) and Drosophila SMOOTH (sm) (see BLAST); an SR-like protein	2	D2089.4/CePTB/ptb-1	D2089.4	D2089.4	603	136	467	560	224	336	674	269	405	0	1.153	0.205393
431	Member of the mitochondrial import inner membrane translocase subunit Tim17, has a region of high similarity to a region of mitochondrial inner membrane translocase subunit 17b (human TIMM17B), which is involved in mitochondrial translocation	4	D2096.1	D2096.1	D2096.1	1498	132	1366	1278	231	1047	1539	278	1261	0	1.083	0.115033
432	Protein with weak similarity over C-terminal half to S. cerevisiae GTPase-activating protein, GYP7; contains a coiled-coil region	2	E01G4.1	E01G4.1	E01G4.1	540	132	408	365	239	126	439	287	152	0	2.684	1.42438
433	Protein of unknown function	4	M01H9.4	M01H9.4	M01H9.4	907	136	771	962	240	722	1159	289	870	0	0.886	-0.174621
434	Protein of unknown function	4	M02B1.2	M02B1.2	M02B1.2	886	137	749	853	247	606	1027	297	730	0	1.026	0.0370307
435		2		no_gene	M03A1.4	656	141	515	708	251	457	853	302	551	0	0.935	-0.0969617
436	Protein of unknown function	4	M03D4.3	M03D4.3	M03D4.3	217	138	79	243	259	-16	292	312	-20	0
437	Protein containing one uncharacterized domain DUF6	5	M03F8.2	M03F8.2	M03F8.2	599	138	461	643	266	377	774	320	454	0	1.015	0.0214797
438	Protein of unknown function, has low similarity to uncharacterized C. elegans F16H6.5	1	M04C9.1	M04C9.1	M04C9.1	375	139	236	543	269	274	654	324	330	0	0.715	-0.483985
439	Putative nuclear hormone receptor; contains C4-type zinc finger domains; similar to human and D. melanogaster hepatocyte nuclear factors (HNF4)	X	nhr-1/crf-1/R09G11.2	R09G11.2	R09G11.2	530	140	390	618	273	345	744	328	416	0	0.938	-0.0923402
440	Member of the 7-transmembrane chemoreceptor family of G-protein coupled receptors (GPCR), has low similarity to C. elegans ODR-10, which is involved in odorant response	5	R10E8.5	R10E8.5	R10E8.5	413	140	273	600	283	317	722	340	382	0	0.715	-0.483985
441	Protein of unknown function	1	R119.5	R119.5	R119.5	514	144	370	596	294	302	718	354	364	0	1.016	0.0229004
442		5		multiple	R11D1.9	692	137	555	848	288	560	1021	346	675	0	0.822	-0.28279
443	Protein containing glutathione S-transferase N- and C-terminal domains, has moderate similarity to prostaglandin D2 synthase (human PGDS), which is a prostaglandin D synthase and glutathione S-transferase that regulates non-rapid eye movement sleep	X	R11G1.3	R11G1.3	R11G1.3	211	113	98	223	126	97	268	151	117	0	0.838	-0.254978
444	Protein of unknown function, has similarity over the N-terminal two-thirds to human basic-leucine zipper nuclear factor JEM1	3	R12B2.2	R12B2.2	R12B2.2	746	118	628	806	145	661	971	174	797	0	0.788	-0.343732
445		5		Y43F8B.5	Y43F8B.5	527	121	406	267	118	149	321	142	179	0	2.268	1.18142
446	Protein with strong similarity to C. elegans Y43F8B.F gene product	5	Y43F8B.9/Y43F8B.E	Y43F8B.9	Y43F8B.9	825	118	707	752	130	622	906	156	750	0	0.943	-0.0846703
447	Neuropeptide neurotransmitter	5	Y43F8C.2	Y43F8C.2	Y43F8C.2	2357	130	2227	583	173	410	702	208	494	0	4.508	2.17249
448	Protein with high similarity to choline-ethanolaminephosphotransferase (human CEPT1), which catalyzes the formation of phosphatidylcholine or phosphatidylethanolamine from diacylglycerol, member of the CDP-alcohol phosphatidyltransferase family	5	Y49A3A.1/Y49A3A.A	Y49A3A.1	Y49A3A.1	4805	127	4678	2478	174	2304	2985	209	2776	0	1.685	0.752749
449	Protein of unknown function	5	Y49A3A.3	Y49A3A.3	Y49A3A.3	936	123	813	661	172	489	796	207	589	0	1.38	0.464668
450	Protein of unknown function, has a region of moderate similarity to a region of carboxyl ester lipase (human CEL), which hydrolyzes cholesterol and dietary esters and is involved in the intestinal absorption of dietary lipids and fat soluble vitamins	3	Y49E10.10/Y49E10.J	Y49E10.10	Y49E10.10	209	124	85	288	174	114	346	209	137	0	0.62	-0.68966
451	Member of the profilin protein family	1	pfn-1/Y18D10A.20/Y18D10A.T	Y18D10A.20	Y18D10A.20	2556	120	2436	2086	177	1909	2513	213	2300	0	1.059	0.0827026
452		1		AF159950-1.Y18D10A	Y18D10A.5	1726	120	1606	970	188	782	1168	226	942	0	1.705	0.769772
453	Protein containing two collagen triple helix repeats and one nematode cuticle collagen N-terminal domain, has moderate similarity to a region of C. elegans BLI-1, which is a putative collagen	5	Y2H9A.3/Y2H9.B	Y2H9A.3	Y2H9A.3	544	128	416	418	189	229	503	227	276	0	1.507	0.591679
454		2		AF053067-1.Y38F1A	Y38F1A.5	524	128	396	463	198	265	557	238	319	0	1.241	0.311503
455		1		Y40B1A.1	Y40B1A.1	470	134	336	656	214	442	790	257	533	0	0.63	-0.666576
456	Member of the protein phosphatase protein family	5	Y40H4A.2/Y40H4A.B	Y40H4A.2	Y40H4A.2	251	134	117	335	222	113	403	267	136	0	0.86	-0.217591
457	Protein containing a DUF41 domain of unknown function	4	F38A5.11	F38A5.11	F38A5.11#2	202	131	71	222	230	-8	267	277	-10	0
458	Protein of unknown function, has low similarity to uncharacterized S. pombe Spac21e11.07p	1	F39H2.3	F39H2.3	F39H2.3#2	1616	135	1481	1702	235	1467	2050	283	1767	0	0.838	-0.254978
459	Protein containing a TBC domain, which may be GTPase activators of Rab-like small GTPases, has low similarity to uncharacterized human FLJ10743	X	F45E6.3	F45E6.3	F45E6.3#2	477	137	340	344	239	105	414	287	127	0	2.677	1.42062
460	Member of the trypsin family of serine proteases	1	F48A9.3	F48A9.3	F48A9.3#2	391	135	256	404	241	163	486	290	196	0	1.306	0.385155
461	Member of the galactoside-binding lectin protein family	4	F49F1.11	F49F1.11	F49F1.11#2	352	138	214	216	255	-39	260	307	-47	0
462	Member of the sodium:solute symporter family of membrane transporters, has low similarity to sodium-dependent multivitamin transporter (rat Slc5a6), which mediates the electrogenic uptake of pantothenate, biotin, and lipoate by cells	X	F52H2.4	F52H2.4	F52H2.4#2	383	139	244	518	264	254	624	318	306	0	0.797	-0.327348
463	Member of the 7-transmembrane chemoreceptor family of G-protein coupled receptors (GPCR), has high similarity to uncharacterized C. elegans F20E11.4	5	Y37H2C.4	Y37H2C.4	Y37H2C.4#2	341	141	200	269	269		324	324		0
464	Protein containing a cold-shock nucleic acid binding domain, which bind both single-stranded DNA and single-stranded RNA, has moderate similarity to cold shock domain protein A (mouse Csda), which is a transcriptional repressor	3	Y39A1C.3	Y39A1C.3	Y39A1C.3#2	5329	141	5188	3678	275	3403	4431	331	4100	0	1.265	0.339137
465	Putative ortholog of C. elegans Y113G7C.A gene product	5	ZC15.2	ZC15.2	ZC15.2#2	309	134	175	347	278	69	418	334	84	0	2.083	1.05866
466	Protein of unknown function, has low similarity to uncharacterized C. elegans K06H6.1	5	ZK1055.5	ZK1055.5	ZK1055.5#2	325	133	192	347	287	60	418	345	73	0	2.63	1.39506
467	Protein with strong similarity to C. elegans F40F4.6 gene product	X	ZK1193.3	ZK1193.3	ZK1193.3#2	342	140	202	336	295	41	404	355	49	0	4.122	2.04334
468	Protein containing four C2H2 type zinc finger domains, which bind nucleic acids	5	ZK287.6	ZK287.6	ZK287.6#2	1496	135	1361	1437	287	1150	1731	345	1386	0	0.982	-0.0262051
469	Signal transduction protein of the phosphatidylinositol-3-OH kinase (PI(3)K) family; involved in control of multiple processes including dauer larva formation, longevity, fertility, thermotolerance, and adult motility	2	age-1/daf-23/B0334.8	B0334.8	B0334.8	859	122	737	613	123	490	738	148	590	0	1.249	0.320773
470	Protein with high similarity to ribosomal protein L23 (S. cerevisiae Rpl23bp), which is a structural ribosomal protein, member of the ribosomal L14p or L23e family, which are part of the large ribosomal subunit and may bind rRNA	3	B0336.10	B0336.10	B0336.10	4588	120	4468	2317	149	2168	2791	179	2612	0	1.711	0.77484
471	Protein with high similarity to 60S ribosomal protein L29 (S. pombe Rpl29p), which binds RNA, member of the ribosomal L29e family, which are part of the large ribosomal subunit	4	B0513.3	B0513.3	B0513.3	3908	119	3789	3625	157	3468	4367	189	4178	0	0.907	-0.140826
472	Protein of unknown function, has weak similarity to C. elegans K10B3.1	4	Nx/C01F6.9	C01F6.9	C01F6.9	761	116	645	793	126	667	955	151	804	0	0.802	-0.318326
473	Protein of unknown function that may be anchored to the membrane of a secretory vesicle or the Golgi apparatus	1	C04F12.5	C04F12.5	C04F12.5	490	126	364	374	143	231	450	172	278	0	1.309	0.388465
474	Protein of unknown function, has moderate similarity to uncharacterized human APACD	3	C05D11.3	C05D11.3	C05D11.3	2653	129	2524	2228	165	2063	2684	198	2486	0	1.015	0.0214797
475	Protein with high similarity to ribosomal protein S10 (human RPS10), which is a component of the small 40S ribosomal subunit that is likely to play a role in translation initiation and may be associated with colorectal carcinogenesis	1	rps-10/D1007.6	D1007.6	D1007.6	1633	127	1506	1690	165	1525	2036	198	1838	0	0.819	-0.288065
476	Protein with high similarity to human NDUFB7, which is a subunit of the NADH-ubiquinone oxidoreductase complex I and may function as a cell adhesion molecule and metastasis	1	D2030.4	D2030.4	D2030.4	2419	127	2292	1635	169	1466	1969	203	1766	0	1.298	0.37629
477	Protein of unknown function, has high similarity to uncharacterized C. elegans F01D5.2	2	F01D5.3	F01D5.3	F01D5.3	828	122	706	842	177	665	1014	213	801	0	0.881	-0.182786
478	Protein containing two collagen triple helix repeats, which are found in some extracellular proteins and nematode cuticle collagen N-terminal domain, has high similarity to a region of C. elegans BLI-1	3	F09G8.6	F09G8.6	F09G8.6	1038	125	913	781	195	586	940	234	706	0	1.293	0.370722
479	Protein containing one DUF148 domain of unknown function, has strong similarity to uncharacterized C. elegans F11F1.2	3	F11F1.5	F11F1.5	F11F1.5	283	123	160	225	200	25	271	240	31	0	5.161	2.36765
480	Putative ortholog of C. elegans C41H7.5 gene product	2	F14D2.2	F14D2.2	F14D2.2	337	126	211	379	205	174	456	246	210	0	1.005	0.0071955
481	Protein with high similarity to ribosomal protein L2 (S. cerevisiae Rpl2Bp), which is part of the large ribosomal subunit, member of the ribosomal L2 family	5	B0250.1	B0250.1	B0250.1	7023	133	6890	5270	215	5055	6349	259	6090	0	1.131	0.177599
482	Protein of unknown function	2	B0432.3	B0432.3	B0432.3	1515	131	1384	1038	224	814	1250	269	981	0	1.411	0.496718
483	Protein of unknown function	1	C01H6.8	C01H6.8	C01H6.8	1642	130	1512	1816	230	1586	2187	277	1910	0	0.792	-0.336428
484	Protein containing a BTB (BR-C, ttk and babor) or POZ (Pox virus and zinc finger) domain, which are found in some DNA and actin binding proteins and may mediate protein-protein interactions, has moderate similarity to uncharacterized C. elegans B0047.2	2	C08E3.2	C08E3.2	C08E3.2	193	132	61	192	230	-38	231	277	-46	0
485	G protein-coupled receptor, probably involved in chemosensation by sensory amphid neurons, no homolog found in human or D. melanogaster	3	srg-2/C18F10.5	C18F10.5	C18F10.5	289	131	158	220	231	-11	265	278	-13	0
486	Member of the C-type lectin family	5	C29F3.5	C29F3.5	C29F3.5	476	133	343	337	235	102	406	283	123	0	2.789	1.47975
487	Protein of unknown function	4	F42G8.10	F42G8.10	F42G8.10	4462	138	4324	2819	247	2572	3396	297	3099	0	1.395	0.480265
488	Member of the ubiquitin-conjugating enzyme (E2) family, which catalyze the covalent attachment of ubiquitin to target proteins, has low similarity to ubiquitin-conjugating enzyme E2 (C. albicans Rad6p), which is involved in DNA repair	3	F56D2.4	F56D2.4	F56D2.4	273	137	136	321	260	61	386	313	73	0	1.863	0.897628
489	Protein of unknown function, has high similarity to uncharacterized C. elegans F49D11.3	1	F56H6.4	F56H6.4	F56H6.4	274	143	131	312	269	43	375	324	51	0	2.569	1.36121
490	Protein with moderate similarity to C. elegans T08G3.11 gene product	5	F57E7.2	F57E7.2	F57E7.2	199	142	57	230	275	-45	277	331	-54	0
491		4		H04M03.7	H04M03.7	204	133	71	348	277	71	419	333	86	0	0.826	-0.275786
492	Protein of unknown function	X	K09C4.6	K09C4.6	K09C4.6	340	127	213	373	280	93	449	337	112	0	1.902	0.927517
493	Protein containing a major sperm protein (MSP) domain, which are involved in sperm motility, has weak similarity to uncharacterized C. elegans ZK354.7	5	C15H11.1	C15H11.1	C15H11.1	284	139	145	629	284	345	757	342	415	0	0.349	-1.5187
494	Protein of unknown function, predicted to contain a glycosylphosphatidylinositol (GPI) lipid anchor	X	C17G1.5	C17G1.5	C17G1.5	533	132	401	646	279	367	778	336	442	0	0.907	-0.140826
495	Protein of unknown function	3	C18D11.1	C18D11.1	C18D11.1	1315	123	1192	678	103	575	816	124	692	0	1.723	0.784923
496	Protein containing two von Willebrand factor (vWF) type A domains, has weak similarity to matrilin 1 (cartilage matrix protein, mouse Matn1), which is a putative component of the extracellular matrix that forms homodimers and binds collagen and aggrecan	4	C18H7.1	C18H7.1	C18H7.1	669	119	550	331	127	204	398	153	245	0	2.245	1.16672
497	Protein of unknown function, has low similarity to uncharacterized C. elegans R04F11.1	X	C24H10.1	C24H10.1	C24H10.1	521	118	403	397	150	247	478	180	298	0	1.352	0.435095
498	Protein with moderate similarity to C. elegans F35D11.1 gene product	X	C25G6.1	C25G6.1	C25G6.1	341	108	233	295	131	164	355	157	198	0	1.177	0.235114
499	Protein with weak similarity to C. elegans F55C12.7 gene product	X	F09E10.6	F09E10.6	F09E10.6	304	112	192	371	115	256	446	138	308	0	0.623	-0.682696
500		X		F13B9.5	F13B9.5	403	122	281	322	132	190	387	159	228	0	1.232	0.301002
501	Member of the class 2 lipase family, has moderate similarity to uncharacterized C. elegans C09E8.2	2	F14E5.5	F14E5.5	F14E5.5	455	123	332	465	135	330	560	162	398	0	0.834	-0.261881
502	Protein of unknown function	2	F18A11.4/Y38F1A.M	F18A11.4	F18A11.4	492	123	369	393	123	270	473	148	325	0	1.135	0.182692
503	Protein of unknown function	X	F18E9.3	F18E9.3	F18E9.3	928	120	808	750	131	619	903	157	746	0	1.083	0.115033
504	Protein of unknown function, has moderate similarity to a region of C. elegans CUT-1, which is a cuticulin component	X	F20D1.8	F20D1.8	F20D1.8	483	123	360	434	147	287	522	177	345	0	1.043	0.0607392
505	Protein of unknown function	X	F09F9.1	F09F9.1	F09F9.1	264	126	138	312	188	124	375	226	149	0	0.926	-0.110916
506	Protein of unknown function	5	kup-1/kup1/F10C2.2	F10C2.2	F10C2.2	2115	128	1987	1877	204	1673	2261	245	2016	0	0.986	-0.0203404
507	Protein with low similarity to excision repair cross complementing 1 (mouse Ercc1), which is an endonuclease which forms a complex with XPF (ERCC4) to function in nucleotide excision and DNA crosslink repair and is essential for viability	1	F10G8.7	F10G8.7	F10G8.7	1024	135	889	771	213	558	928	256	672	0	1.323	0.403813
508		X		F13B9.6	F13B9.6	304	131	173	259	225	34	312	271	41	0	4.22	2.07724
509	Putative ortholog of C. elegans F13C5.7 gene product	X	F13C5.6	F13C5.6	F13C5.6	568	129	439	445	230	215	536	277	259	0	1.695	0.761285
510	Protein containing a dual specificity phosphatase catalytic domain, has moderate similarity to human DUSP13, which is a dual specificity phosphatase that may play a role in regulation of meiosis and differentiation of testicular germ cells	X	F13D11.3	F13D11.3	F13D11.3	813	129	684	938	234	704	1130	281	849	0	0.806	-0.311148
511	Protein of unknown function	X	F32A6.2	F32A6.2	F32A6.2	490	123	367	507	233	274	610	280	330	0	1.112	0.153157
512		1		multiple	F32H2.9	345	125	220	511	233	278	615	280	335	0	0.657	-0.606035
513	Protein of unknown function, has high similarity to uncharacterized C. elegans F28A12.3	2	F35C5.11	F35C5.11	F35C5.11	879	127	752	985	246	739	1186	296	890	0	0.845	-0.242977
514	Protein of unknown function, has low similarity to uncharacterized C. elegans Y47H9B.2	1	F35E2.3	F35E2.3	F35E2.3	295	125	170	484	251	233	583	302	281	0	0.605	-0.724993
515	Protein containing a DUF40 domain of unknown function, which contain four conserved cysteines, has strong similarity to uncharacterized C. elegans T28A11.7	5	F35F10.9	F35F10.9	F35F10.9	218	124	94	237	256	-19	285	308	-23	0
516	Member of the rhodopsin family of G protein-coupled receptors (GPCR), has low similarity to C. elegans NPR-1	X	F35G8.1	F35G8.1	F35G8.1	263	132	131	328	261	67	395	314	81	0	1.617	0.69332
517	Protein containing a LIM domain, which may mediate protein-protein interaction, has weak similarity to a region of epithelial protein lost in neoplasm beta (human EPLIN), which is a component of the actin cytoskeleton that regulates cell growth	4	Y57G11A.3	Y57G11A.3	Y57G11A.3	546	138	408	552	273	279	665	328	337	0	1.211	0.276199
518	Methyltransferase required for ubiquinone synthesis; similar to S. cerevisiae Coq3p	4	coq-3/Y57G11C.11	Y57G11C.11	Y57G11C.11	786	133	653	638	274	364	768	330	438	0	1.491	0.57628
519		1		Y63D3A.10	Y63D3A.1	192	129	63	240	273	-33	289	328	-39	0
520	Protein of unknown function	3	Y66A7A.7	Y66A7A.7	Y66A7A.7	272	132	140	451	277	174	543	333	210	0	0.667	-0.584241
521		3		AF172092-1.Y75B8A	Y75B8A.1	1050	119	931	799	94	705	962	113	849	0	1.097	0.133564
522	Putative ortholog of C. elegans Y75B8A.G gene product	3	Y75B8A.6	Y75B8A.6	Y75B8A.6	501	121	380	336	103	233	404	124	280	0	1.357	0.440421
523	Protein of unknown function, has a region of low similarity to a region of inositol polyphosphate multikinase (rat Ipmk), which catalyzes the formation of Ins-1,4,5-P3, Ins-1,3,4,5-P4, Ins-1,3,4,5,6-P5 and 5-pyrophosphate-InsP4	4	ZK795.1	ZK795.1	ZK795.1	563	121	442	436	113	323	525	136	389	0	1.136	0.183963
524	Protein with high similarity to galectin (C. elegans LEC-1), which is a galactoside-binding lectin, member of the galectin family	2	lec-3/ZK892.1	ZK892.1	ZK892.1	1901	113	1788	1147	117	1030	1381	140	1241	0	1.441	0.52707
525	Protein of unknown function	2	ZK930.2	ZK930.2	ZK930.2	1196	117	1079	1345	106	1239	1620	127	1493	0	0.723	-0.467932
526	Member of the Ndr family, which are involved in cell differentiation, has low similarity to n-myc downstream regulated gene 1 (human NDRG1), which is induced by nickel, homocysteine, 2-mercaptoethanol, and tunicamycin	X	ZK1073.1	ZK1073.1	ZK1073.1	1748	119	1629	1437	103	1334	1731	124	1607	0	1.014	0.0200577
527	Protein of unknown function	X	ZK1193.4	ZK1193.4	ZK1193.4	291	118	173	201	118	83	242	142	100	0	1.73	0.790772
528	Protein of unknown function	4	B0564.2	B0564.2	B0564.2	357	117	240	309	120	189	372	144	228	0	1.053	0.0745054
529		5		no_gene	Y5H2A.C	384	115	269	401	115	286	483	138	345	0	0.78	-0.358454
530	Putative ortholog of C. elegans C50H11.15 gene product	5	Y5H2B.6	Y5H2B.6	Y5H2B.B	266	117	149	217	120	97	261	144	117	0	1.274	0.349365
531	Protein with strong similarity to C. elegans Y5H2B.G gene product	5	Y5H2B.3	Y5H2B.3	Y5H2B.G	345	122	223	236	165	71	284	198	86	0	2.593	1.37462
532	Putative ortholog of C. elegans Y6D1A.D gene product	2	T27D12.4	T27D12.4	Y6D1A.D	689	124	565	605	200	405	728	240	488	0	1.158	0.211635
533	Protein of unknown function, putative paralog of C. elegans Y9C9A.17	4	Y9C9A.9	Y9C9A.9	Y9C9A_53.C	272	126	146	233	207	26	280	249	31	0	4.71	2.23573
534	Protein of unknown function, has strong similarity to C. elegans C33A12.12	4	Y9C9A.13	Y9C9A.13	Y9C9A_54.B	231	124	107	297	215	82	357	259	98	0	1.092	0.126973
535	Member of the astacin (M12A) family of metalloproteases, has very strong similarity to uncharacterized C. elegans F56A4.1	5	Y19D10A.6/Y19D10A.K	Y19D10A.6	Y19D10A.K	249	127	122	204	226	-22	245	272	-27	0
536	Protein with low similarity to solute carrier family 17 member 1 (mouse SLC17A1), which is involved in sodium-dependent phosphate transport, mediates hepatic and renal anion drug transport and plays a role in maintaining phosphate homeostasis	5	Y19D10A.5/Y19D10A.M	Y19D10A.5	Y19D10A.M	439	130	309	280	229	51	337	275	62	0	4.984	2.3173
537	Protein of unknown function	X	Y23B4A.2	Y23B4A.2	Y23B4A.B	711	124	587	697	233	464	839	280	559	0	1.05	0.0703893
538	Protein of unknown function	4	Y24D9A.6/Y24D9A_29.B	Y24D9A.6	Y24D9A.B	229	127	102	330	242	88	397	291	106	0	0.962	-0.0558912
539	Putative transaldolase, which catalyzes a step in the pentose phosphate pathway	4	Y24D9A.3	Y24D9A.3	Y24D9A.E	2528	126	2402	1125	246	879	1355	296	1059	0	2.268	1.18142
540	Protein of unknown function	4	Y24D9A.5/Y24D9A_29.C	Y24D9A.5	Y24D9A.H	402	121	281	481	250	231	579	301	278	0	1.011	0.015783
541	Putative ortholog of C. elegans Y55D5A.I gene product	3	Y55D5A.1	Y55D5A.1	Y55D5A_392.F	247	122	125	477	252	225	574	303	271	0	0.461	-1.11716
542		4		Y55F3BR.4	Y55F3A_747.G	214	130	84	237	260	-23	285	313	-28	0
543	Protein with moderate similarity to D. melanogaster CG11183 (CG11183 gene product)	4	Y55F3AM.12	Y55F3AM.12	Y55F3A_748.C	1351	137	1214	1118	276	842	1346	332	1014	0	1.197	0.259423
544		4		no_gene	Y55F3A_748.H	352	136	216	264	273	-9	318	328	-10	0
545	Putative ortholog of C. elegans F30H5.3 gene product	4	Y55F3BR.2/Y55F3BR.K	Y55F3BR.2	Y55F3A_749.B	548	127	421	647	270	377	779	325	454	0	0.927	-0.109359
546		m		Y55F3C.6	Y55F3C.C	355	123	232	445	273	172	536	328	208	0	1.115	0.157044
547	Putative paralog of C. elegans C41G7.6	4	Y59E9AL.6	Y59E9AL.6	Y59E9_118.E	276	112	164	924	82	842	1113	98	1015	0	0.162	-2.62593
548	Protein of unknown function, putative paralog of C. elegans Y59E9AR.8	4	Y59E9AR.2	Y59E9AR.2	Y59E9_120.B	235	112	123	223	82	141	268	98	170	0	0.724	-0.465938
549	Putative paralog of C. elegans T07G12.5	4	Y59E9AL.4	Y59E9AL.4	Y59E9_122.A	400	117	283	359	93	266	432	112	320	0	0.884	-0.177882
550		X		Y60A9.3	Y60A9B.A	257	114	143	294	102	192	354	122	232	0	0.616	-0.698998
551	Protein of unknown function, has moderate similarity to C. elegans H02F09.4	5	Y61A9LA.9	Y61A9LA.9	Y61A9LA_69.A	545	119	426	399	101	298	480	121	359	0	1.187	0.24732
552	Ortholog of Son of sevenless, a guanine nucleotide exchange factor in the Ras developmental signaling pathway, believed to stimulate the Ras GTPase LET-60	5	sos-1/let-341/Y61A9LA.6	Y61A9LA.6	Y61A9LA_70.A	1157	119	1038	820	98	722	987	118	869	0	1.194	0.255803
553		4		Y105C5A.4	Y105C5A.C	198	122	76	219	127	92	263	153	110	0	0.691	-0.533242
554		4		Y105C5A.6	Y105C5A.E	183	119	64	293	138	155	353	166	187	0	0.342	-1.54793
555	Protein of unknown function, putative paralog of C. elegans ZC204.4	4	Y105C5A.11	Y105C5A.11	Y105C5A.J	286	115	171	283	119	164	340	143	197	0	0.868	-0.204233
556	Protein with strong similarity to C. elegans Y105C5.L gene product	m	Y105C5A.13/Y105C5A.12/Y105C5A.K/Y105C5A.L	Y105C5A.13	Y105C5A.	1369	115	1254	1887	111	1776	2273	133	2140	0	0.586	-0.771027
557		4		no_gene	Y105C5A.N	192	116	76	194	134	60	233	161	72	0	1.056	0.0786098
558		4		no_gene	Y105C5A.W	261	125	136	319	196	123	384	236	148	0	0.919	-0.121863
559	Protein containing a protein kinase domain, has low similarity to P. carinii Mkp2_carinii, which is a mitogen-activated protein kinase	3	Y111B2A.1/Y111B2A.A	Y111B2A.1	Y111B2A.A	361	131	230	354	203	151	426	244	182	0	1.264	0.337996
560	Putative ortholog of C. elegans Y111B2B.A gene product	3	Y111B2A.21	Y111B2A.21	Y111B2B.A	302	130	172	285	213	72	343	256	87	0	1.977	0.983313
561		3		no_gene	Y111B2C.A	324	131	193	409	216	193	492	260	232	0	0.832	-0.265345
562		3		Y111B2A.10	Y111B2C.	855	131	724	693	222	471	834	267	567	0	1.277	0.352759
563		3		Y111B2A.16	Y111B2D.E	486	132	354	580	230	350	698	277	421	0	0.841	-0.249822
564	Protein containing a PAZ (Piwi, Argonaut and Zwille) domain, which may mediate protein-protein interactions	5	F55C9.3	F55C9.3	Y116F11A.A	474	135	339	353	242	111	425	291	134	0	2.53	1.33914
565	Putative ortholog of C. elegans Y69A2A_7025.B gene product	4	Y69A2AR.31	Y69A2AR.31	Y69A2A_7025.B	359	133	226	461	250	211	555	301	254	0	0.89	-0.168123
566	Putative ortholog of C. elegans Y69A2A_7278.E gene product	4	Y69A2AR.6	Y69A2AR.6	Y69A2A_7278.E	493	124	369	455	251	204	548	302	246	0	1.5	0.584963
567		n		no_pcr	Y71F9A_282.A	270	125	145	440	254	186	530	306	224	0	0.647	-0.628162
568		n		no_pcr	Y71G10A_85.A	250	128	122	460	256	204	554	308	246	0	0.496	-1.01159
569	Protein with weak similarity to C. elegans Y51F10.4 gene product	1	Y71G12B.2/Y71G12B.GG	Y71G12B.2	Y71G12A_202.E	474	130	344	628	272	356	756	327	429	0	0.802	-0.318326
570	Putative ortholog of C. elegans W09C3.3 gene product	1	Y71G12B.18	Y71G12B.18	Y71G12A_205.B	182	131	51	299	269	30	360	324	36	0	1.417	0.50284
571		1		Y105E8A.ll	Y105E8A.B	1143	126	1017	908	269	639	1093	324	769	0	1.322	0.402722
572		1		Y105E8A.aa	Y105E8C.A	441	123	318	560	271	289	674	326	348	0	0.914	-0.129734
573		1		no_gene	Y105E8C.I	614	108	506	332	71	261	400	85	315	0	1.606	0.683472
574		1		Y105E8A.i	Y105E8C.R	1771	109	1662	692	75	617	833	90	743	0	2.237	1.16157
575		1		Y105E8A.f	Y105E8C.U	465	112	353	277	89	188	333	107	226	0	1.562	0.643394
576		1		Y105E8A.cc	Y105E8D.B	838	114	724	513	97	416	618	116	502	0	1.442	0.528071
577	Putative ortholog of C. elegans C51G7.3 gene product	3	Y79H2A.3/Y79H2A.E/Y79H2A.C	Y79H2A.3	C51G7.F	955	117	838	937	97	840	1128	116	1012	0	0.828	-0.272297
578	Putative ortholog of C. elegans F54A3.B gene product	2	F54A3.6	F54A3.6	F54A3_31.B	1369	117	1252	1079	104	975	1300	125	1175	0	1.066	0.0922074
579	Putative ortholog of C. elegans T08D2.E gene product	2	F54A3.1	F54A3.1	F54A3_31.G	663	129	534	547	132	415	659	159	500	0	1.068	0.0949116
580	Protein of unknown function	2	R05G9R.1/R05G9R.A	R05G9R.1	R05G9R.A	388	130	258	330	144	186	397	173	224	0	1.152	0.204141
581	Protein of unknown function, putative paralog of C. elegans W06H8.A	5	W06H8.6	W06H8.6	W06H8.A	1113	130	983	593	147	446	714	177	537	0	1.831	0.872632
582	Putative paralog of C. elegans ZK250.6	2	Y16E11A.1	Y16E11A.1	Y16E11A_119.B	482	123	359	639	148	491	769	178	591	0	0.607	-0.720232
583	Putative ortholog of C. elegans Y69A2A_7278.F gene product	4	Y69A2AR.5/Y69A2AR.CC	Y69A2AR.5	Y69A2A_7278.F	634	119	515	658	165	493	792	198	594	0	0.867	-0.205896
584	Protein with weak similarity to D. melanogaster CG17454 (CG17454 gene product)	3	Y71D11A.2	Y71D11A.2	Y71D11A.D	1182	131	1051	1092	198	894	1315	238	1077	0	0.976	-0.0350469
585	Protein with moderate similarity to C. elegans C01G10.10 gene product	3	Y71H2AM.1	Y71H2AM.1	Y71H2_385.B	738	134	604	658	203	455	792	244	548	0	1.102	0.140124
586	Protein with moderate similarity to D. melanogaster EG:25E8.3 (Protein of unknown function)	1	Y23H5B.5/Y23H5B.D	Y23H5B.5	Y74C10A_158.C	256	133	123	410	212	198	493	255	238	0	0.517	-0.951764
587	Putative ortholog of H. sapiens KIAA0560 (KIAA0560 gene product)	5	Y80D3A.2	Y80D3A.2	Y80D3A.H	762	134	628	652	218	434	785	262	523	0	1.201	0.264236
588		4		F53H1.1	Y104H12B_374.A	1300	134	1166	877	227	650	1056	273	783	0	1.489	0.574344
589	Protein with strong similarity to D. melanogaster CG5026 (CG5026 gene product)	5	Y39H10A.3/Y39H10A.F	Y39H10A.3	Y39H10A_225.E	454	134	320	503	238	265	606	286	320	0	1	0
590	Protein with strong similarity to C. elegans ZK546.4	4	Y40C5A.3	Y40C5A.3	Y40C5A.H	358	131	227	322	243	79	387	292	95	0	2.389	1.25641
591	Putative ortholog of C. elegans Y41D4B.F gene product	4	Y41D4B.19	Y41D4B.19	Y41D4A_2768.A	290	129	161	407	255	152	490	307	183	0	0.88	-0.184425
592	Protein of unknown function	4	Y41D4A.7/Y41D4A.B	Y41D4A.7	Y41D4A_3309.A	476	130	346	505	258	247	608	310	298	0	1.161	0.215368
593		4		Y41D4B.13	Y41D4A_3457.C	315	128	187	327	259	68	393	312	81	0	2.309	1.20727
594		n		no_pcr	Y41D4A_4723.A	474	126	348	457	257	200	550	309	241	0	1.444	0.530071
595	Protein with weak similarity to C. elegans unc-54 (Sarcomeric Myosin Heavy Chain, major component of thick filaments in body-wall muscle)	1	Y47G6A.15	Y47G6A.15	Y47G6A_247.E	392	129	263	752	268	484	906	322	584	0	0.45	-1.152
596		2		AF059715-1.Y48C3A	Y48C3A.I	451	126	325	405	265	140	487	319	168	0	1.935	0.952334
597	Protein with weak similarity to C. elegans sap-49 (Putative U2 snRNP-associated protein, putative ortholog of human spliceosome associated protein SAP49 and yeast Hsh49p)	2	Y48C3A.9	Y48C3A.9	Y48C3A.K	605	126	479	519	261	258	625	314	311	0	1.54	0.62293
598	Protein with strong similarity to H. sapiens TOP3B (topoisomerase (DNA) III beta)	2	Y48C3A.15	Y48C3A.15	Y48C3A.R	287	125	162	359	264	95	432	318	114	0	1.421	0.506907
599	Member of the pumilio family of RNA binding domain proteins; required for germline development	1	puf-10/Y48G1BL.3/Y48G1C_55.G/Y48G1BL.E	Y48G1BL.3	Y48G1C_55.B	913	108	805	427	67	360	514	80	434	0	1.855	0.891419
600	Protein with strong similarity to C. elegans Y54G2A.30 gene product	1	Y48G8AL.1	Y48G8AL.1	Y48G8A_1975.A	429	116	313	272	80	192	327	96	231	0	1.355	0.438293
601		?		ND6	ND6	1485	122	1363	1987	101	1886	2393	121	2272	0	0.6	-0.736966
602		?		ND1	ND1	5740	124	5616	8251	124	8127	9940	149	9791	0	0.574	-0.800877
603	Mitochondrial encoded NADH-ubiquinone oxidoreductase chain 2	?	ND2/NU2M	ND2	ND2	8184	122	8062	16742	151	16591	20171	181	19990	0	0.403	-1.31115
604		?		COIII	COIII	6036	133	5903	8006	159	7847	9645	191	9454	0	0.624	-0.680382
605		?		COI	COI	14441	140	14301	24154	166	23988	29101	200	28901	0	0.495	-1.0145
606	Member of the NADH-ubiquinone or plastoquinone oxidoreductase chain 3 family	?	ND3/NU3M	ND3	ND3	1608	133	1475	2858	168	2690	3443	202	3241	0	0.455	-1.13606
607					EMPTY	544	126	418	346	183	163	416	220	196	0	2.133	1.09288
608					EMPTY	308	126	182	376	188	188	453	226	227	0	0.802	-0.318326
609					EMPTY	207	123	84	361	196	165	434	236	198	0	0.424	-1.23786
610					EMPTY	231	128	103	425	204	221	512	245	267	0	0.386	-1.37333
611					EMPTY	274	133	141	348	210	138	419	253	166	0	0.849	-0.236164
612					EMPTY	240	143	97	446	218	228	537	262	275	0	0.353	-1.50226
613	Putative ortholog of C. elegans F57C9.4 gene product	m	K09F6.6	K09F6.6	K09F6.6#2	955	147	808	993	230	763	1196	277	919	0	0.879	-0.186065
614	Protein with low similarity to peter pan homolog (human PPAN), which suppresses anchorage-dependent cell growth and is associated with granulocytic differentiation in promyelocytic leukemia cells	1	K09H9.6	K09H9.6	K09H9.6#2	3958	132	3826	1710	236	1474	2060	284	1776	0	2.154	1.10702
615	Member of the reverse transcriptase protein family, which are RNA-dependent DNA polymerases, has very strong similarity to uncharacterized C. elegans F20B4.7	m	rte-1/K10F12.5	K10F12.5	K10F12.5#2	361	130	231	218	237	-19	262	285	-23	0
616	Member of the Tc3 Transposase protein family	m	R10H1.3	R10H1.3	R10H1.3#2	454	125	329	417	245	172	502	295	207	0	1.589	0.668119
617	Protein of unknown function	X	R11G1.5	R11G1.5	R11G1.5#2	306	125	181	222	257	-35	267	309	-42	0
618	Protein of unknown function	3	R13A5.7	R13A5.7	R13A5.7#2	441	127	314	443	264	179	533	318	215	0	1.46	0.545968
619	Protein of unknown function	X	F48E3.9	F48E3.9	F48E3.1#2	298	119	179	233	264	-31	280	318	-38	0
620	Member of the 7-transmembrane chemoreceptor family of G-protein coupled receptors (GPCR), has low similarity to C. elegans ODR-10, which is involved in odorant response	5	R13D7.1	R13D7.1	R13D7.1#2	167	128	39	185	263	-78	222	316	-94	0
621	Protein of unknown function, has low similarity to uncharacterized C. elegans ZK228.1	5	ZC15.1	ZC15.1	ZC15.1#2	276	130	146	481	267	214	579	321	258	0	0.566	-0.821126
622	Protein of unknown function	3	B0336.7	B0336.7	B0336.7#2	581	121	460	603	262	341	726	315	411	0	1.119	0.16221
623	Member of the C. elegans Sre G protein-coupled chemoreceptor family, which are putative chemosensory receptors, has low similarity to uncharacterized C. elegans F36D1.2	5	ZC455.7	ZC455.7	ZC455.7#2	179	119	60	239	254	-15	287	306	-19	0
624	Protein of unknown function, has moderate similarity to uncharacterized C. elegans F41H8.3	5	C24B9.13	C24B9.13	C24B9.13#2	167	118	49	206	258	-52	248	310	-62	0
625	Member of the pyridoxamine 5'-phosphate oxidase family, which are involved in biosynthesis of pyridoxine and derivatives, has moderate similarity to pyridoxine 5'-phosphate oxidase (rat U91561), which catalyzes the oxidation of pyridoxamine-5'-phosphate	3	F57B9.1	F57B9.1	F57B9.1#2	1554	107	1447	784	70	714	944	84	860	0	1.683	0.751035
626	Putative ortholog of C. elegans par-1 gene product	X	kin-29/F58H12.1	F58H12.1	F58H12.1#2	698	118	580	411	94	317	495	113	382	0	1.518	0.602172
627	Protein of unknown function	3	F59B2.6	F59B2.6	F59B2.6#2	2406	125	2281	1316	115	1201	1585	138	1447	0	1.576	0.656268
628	Protein of unknown function, has strong similarity to uncharacterized C. elegans H27D07.2	5	H05B21.3	H05B21.3	H05B21.3#2	1011	129	882	543	153	390	654	184	470	0	1.877	0.908429
629	Protein containing ten ankyrin (Ank) repeats, has moderate similarity to the regulatory subunit of protein phosphatase 1 (mouse Ppp1r16a), which inhibits protein phosphatase 1 activity toward phosphorylase, myosin light chain, and myosin	1	K02A11.1	K02A11.1	K02A11.1#2	3709	122	3587	2267	172	2095	2731	207	2524	0	1.421	0.506907
630	Member of an uncharacterized protein family	2	K02E7.6	K02E7.6	K02E7.6#2	2557	130	2427	4739	181	4558	5709	218	5491	0	0.442	-1.17788
631	Putative spectrin, contains putative CH (calponin homology) and spectrin domains, has strong similarity to D. melanogaster beta-spectrin and is apparently required for embryonic elongation	5	sma-1/sma-7/sma1/R31.1	R31.1	R31.1#2	493	141	352	406	183	223	489	220	269	0	1.309	0.388465
632	Protein with low similarity to small nuclear RNA activating complex polypeptide 3 50kD (human SNAPC3), which is a DNA binding subunit of SNAPc complex required for transcription by both RNA polymerase II and III snRNA genes	3	tbb-2/T02C12.2	T02C12.2	T02C12.2#2	1493	125	1368	1167	181	986	1406	218	1188	0	1.152	0.204141
633	Protein containing a DUF215 domain of unknown function, has high similarity to uncharacterized C. elegans Y45F10B.4	4	T04A11.8	T04A11.8	T04A11.8#2	198	118	80	233	186	47	280	224	56	0	1.429	0.515006
634	Putative ortholog of C. elegans F46F5.1 gene product	2	T04B8.1	T04B8.1	T04B8.1#2	396	118	278	386	192	194	465	231	234	0	1.188	0.248535
635	Member of the 7-transmembrane chemoreceptor family of G-protein coupled receptors (GPCR), has high similarity to uncharacterized C. elegans C45B11.4	5	T04C12.2	T04C12.2	T04C12.2#2	219	121	98	250	201	49	301	242	59	0	1.661	0.732052
636		4		multiple	T05A1.3#2	1307	126	1181	2099	212	1887	2528	255	2273	0	0.52	-0.943416
637	Protein containing a protein kinase domain, has low similarity to a region of S. cerevisiae Hrr25p, which is a casein kinase I (serine/threonine/tyrosine protein kinase) involved in DNA repair and meiosis	4	C04G2.2	C04G2.2	C04G2.2#2	328	138	190	419	219	200	504	263	241	0	0.788	-0.343732
638	Member of the RNB-like family, which may have exonuclease activity, has moderate similarity to S. pombe Dis3p, which is an essential protein required for anaphase A mitotic events	4	C04G2.6	C04G2.6	C04G2.6#2	1239	155	1084	720	226	494	867	272	595	0	1.822	0.865523
639	Protein of unknown function, has strong similarity to uncharacterized C. elegans Y69E1A.B	4	C04G2.9	C04G2.9	C04G2.9#2	379	162	217	911	241	670	1097	290	807	0	0.269	-1.89432
640	Protein with high similarity to seryl-tRNA synthetase (human SARS), which aminoacylates seryl-tRNA with serine for protein biosynthesis, contains a seryl-tRNA synthetase N-terminal domain and a tRNA synthetase class II core domain (G, H, P, S and T)	4	C47E12.1	C47E12.1	C47E12.1#2	4427	137	4290	3505	240	3265	4222	289	3933	0	1.091	0.125651
641	Member of the glycosyl hydrolase 47 family of alpha-mannosidases, which hydrolyze terminal mannose residues, has moderate similarity to a region of S. cerevisiae Mnl1p, which is involved in endoplasmic reticulum-associated degradation of glycoproteins	4	C47E12.3	C47E12.3	C47E12.3#2	904	130	774	662	234	428	797	281	516	0	1.5	0.584963
642	Protein with high similarity to ubiquitin-activating enzyme E1 (mouse Ube1x), which activates ubiquitin to mark proteins for proteasomal degradation, member of the UBA-THIF-type NAD-FAD binding fold family that also contains a UBACT repeat	4	C47E12.5	C47E12.5	C47E12.5#2	1355	124	1231	659	245	414	793	295	498	0	2.472	1.30568
643	Protein containing a protein kinase domain and a Src homology 2 (SH2) domain, which are regulatory modules of intracellular signaling, has moderate similarity to fer (fps/fes related) tyrosine kinase (mouse Fert2)	4	T04B2.2	T04B2.2	T04B2.2	324	128	196	536	257	279	645	309	336	0	0.583	-0.778432
644	Protein with weak similarity to members of the SRG subfamily of G protein-coupled receptors	4	T04B2.4	T04B2.4	T04B2.4#2	209	153	56	272	273	-1	327	328	-1	0
645	Delta5-fatty acid desaturase; has strong similarity to H. sapiens Hs.132898 gene product	4	fat-4/des-5/T13F2.1	T13F2.1	T13F2.1#2	6309	155	6154	5025	273	4752	6054	328	5726	0	1.075	0.104337
646	Protein of unknown function	4	T13F2.6	T13F2.6	T13F2.6#2	1304	158	1146	815	272	543	981	327	654	0	1.752	0.809003
647	Member of the caveolin protein family	4	cav-1/T13F2.8	T13F2.8	T13F2.8#2	4453	143	4310	2583	274	2309	3112	330	2782	0	1.549	0.631337
648	Protein with high similarity to 3'-phosphoadenosine 5'-phosphosulfate synthase 2 (mouse Papss2), which has ATP sulfurylase and adenosine 5'-phosphosulfate kinase activites, contains an adenylylsulfate kinase domain and an ATP-sulfurylase domain	4	T14G10.1	T14G10.1	T14G10.1#2	1097	130	967	781	261	520	940	314	626	0	1.545	0.627607
649					COLIBACTER1	171	113	58	293	250	43	353	301	52	0	1.115	0.157044
650					COLIBACTER3	240	116	124	425	255	170	512	307	205	0	0.605	-0.724993
651					COLIBACTER5	173	113	60	104	71	33	125	85	40	0	1.5	0.584963
652					COLIBACTER7	183	114	69	130	86	44	156	103	53	0	1.302	0.380729
653					COLIBACTER9	183	115	68	181	108	73	218	130	88	0	0.773	-0.37146
654					COLIBACTER11	170	115	55	155	137	18	186	165	21	0	2.619	1.38902
655					COLIBACTER49	222	113	109	356	161	195	428	193	235	0	0.464	-1.1078
656					COLIBACTER51	160	116	44	163	164	-1	196	197	-1	0
657					COLIBACTER53	216	116	100	370	168	202	445	202	243	0	0.412	-1.27928
658					COLIBACTER55	157	115	42	155	166	-11	186	200	-14	0
659					COLIBACTER57	229	115	114	231	175	56	278	210	68	0	1.676	0.745022
660					COLIBACTER59	193	117	76	295	187	108	355	225	130	0	0.585	-0.773491
661					VIVIA1	180	120	60	147	196	-49	177	236	-59	0
662					VIVIA3	173	122	51	154	207	-53	185	249	-64	0
663					VIVIA5	174	122	52	140	214	-74	168	257	-89	0
664					VIVIA7	154	123	31	168	219	-51	202	263	-61	0
665					VIVIA9	177	125	52	164	228	-64	197	274	-77	0
666					VIVIA11	179	126	53	172	238	-66	207	286	-79	0
667					VIVIA49	160	127	33	330	237	93	397	285	112	0	0.295	-1.76121
668					VIVIA51	166	126	40	368	244	124	443	293	150	0	0.267	-1.90509
669					VIVIA53	185	126	59	387	255	132	466	307	159	0	0.371	-1.43051
670					VIVIA55	164	147	17	443	265	178	533	319	214	0	0.079	-3.662
671					VIVIA57	195	143	52	451	271	180	543	326	217	0	0.24	-2.05889
672					VIVIA59	159	132	27	363	262	101	437	315	122	0	0.221	-2.17788
677	Putative coiled-coil protein, has strong similarity to S. cerevisiae Rhc18p, a protein involved in recombination repair	X	C23H4.6	C23H4.6	C23H4.6	729	120	609	754	276	478	908	332	576	0	1.057	0.0799754
678	Protein containing a major sperm protein (MSP) domain, which are involved in sperm motility, has strong similarity to uncharacterized C. elegans C25D7.12	5	C25D7.2	C25D7.2	C25D7.2	308	117	191	527	282	245	634	339	295	0	0.647	-0.628162
679	Protein containing two PDZ, DHR, or GLGF domains, which are found in signaling proteins, has very strong similarity to uncharacterized C. elegans T21G5.4	4	C25G4.6	C25G4.6	C25G4.6	311	116	195	870	278	592	1048	334	714	0	0.273	-1.87303
680	Member of the pyridine nucleotide-disulphide oxidoreductase family, which are flavoproteins, has low similarity to uncharacterized human FLJ22028	2	C26D10.3	C26D10.3	C26D10.3	454	122	332	442	276	166	532	332	200	0	1.66	0.731183
681	Member of an uncharacterized protein family	m	C27A7.6	C27A7.6	C27A7.6	604	124	480	673	276	397	810	332	478	0	1.004	0.00575927
682	Protein of unknown function, has high similarity to uncharacterized C. elegans F31F6.1	X	C27C12.3	C27C12.3	C27C12.3	344	120	224	313	283	30	377	340	37	0	6.054	2.59789
683	Protein of unknown function, has a region of high similarity to a region of cystinosin (human CTNS), which is a lysosomal membrane protein that may be involved in the lysosomal transport of cystine	2	C41C4.7	C41C4.7	C41C4.7	1237	121	1116	1209	290	919	1456	349	1107	0	1.008	0.0114956
684	Protein containing a SET domain, which are involved in protein-protein interactions, has a region of low similarity to a region of S. pombe Clr4p, which is a protein required for mating-type locus and centromeric silencing	1	C41G7.4	C41G7.4	C41G7.4	324	123	201	429	289	140	516	348	168	0	1.196	0.258217
685	Putative coiled-coil protein, has similarity to S. cerevisiae Smc1p, a protein involved in chromosome condensation and segregation	X	C44C10.4	C44C10.4	C44C10.4	368	128	240	465	286	179	560	344	216	0	1.111	0.151859
686	Protein of unknown function	X	C44H4.4	C44H4.4	C44H4.4	397	131	266	353	285	68	425	343	82	0	3.244	1.69777
687	Putative ortholog of C. elegans C44H9.4 gene product	5	C44H9.2	C44H9.2	C44H9.2	293	121	172	240	276	-36	289	332	-43	0
688	Probable membrane transporter of the ATP-binding cassette (ABC) superfamily, has strong similarity to human multidrug resistance proteins PGY1 and PGY3, has strong similarity to D. melanogaster multidrug resistance proteins MDR49 and MDR65	5	C47A10.1	C47A10.1	C47A10.1	290	117	173	338	270	68	407	325	82	0	2.11	1.07724
689	Member of the alcohol dehydrogenase protein family	5	K12G11.4	K12G11.4	K12G11.4	321	123	198	227	272	-45	273	327	-54	0
690	Protein of unknown function, has very strong similarity to uncharacterized C. elegans T26E4.12	5	M01B2.2	M01B2.2	M01B2.2	273	125	148	254	264	-10	306	318	-12	0
691	Protein of unknown function, has high similarity to uncharacterized C. elegans F40D4.8	5	M01B2.5	M01B2.5	M01B2.5	182	117	65	261	266	-5	314	320	-6	0
692	Protein containing a KIX domain, which bind transcription factor transactivation domains, has a region of low similarity to a region of C. elegans CBP-1, which is a transcriptional activator that may be involved in cell differentiation	1	M01E5.6	M01E5.6	M01E5.6	414	120	294	256	268	-12	308	322	-14	0
693	Protein of unknown function, has weak similarity to uncharacterized C. elegans T03E6.6	1	M01G12.6	M01G12.6	M01G12.6	393	117	276	557	271	286	671	326	345	0	0.8	-0.321928
694	Putative ortholog of C. elegans T08B6.5 gene product	3	Y41C4A.1	Y41C4A.1	M02C10.1	222	116	106	415	275	140	500	331	169	0	0.627	-0.673463
695	Member of the glycosyl hydrolase 18 family, has low similarity to chitinase 1 (chitotriosidase, human CHIT1), which catalyzes the hydrolysis of chitin and is associated with Gaucher disease and chitotriosidas	2	R09D1.2	R09D1.2	R09D1.2	310	117	193	304	283	21	366	340	26	0	7.423	2.892
696	Member of the glycosyl hydrolase 18 family, has a region of weak similarity to a region of chitinase 1 (human CHIT1), which catalyzes hydrolysis of chitin and is associated with Gaucher disease and chitotriosidase deficiency	2	R09D1.4	R09D1.4	R09D1.4	210	120	90	257	299	-42	309	360	-51	0
697	Member of the sugar (and other) transporter family, has low similarity to brain-specific Na+-dependent inorganic phosphate cotransporter (rat Slc17a7), which is a vesicular glutamate transporter with a presynaptic role in glutamatergic neurotransmission	5	R10D12.1	R10D12.1	R10D12.1	442	120	322	526	301	225	633	362	271	0	1.188	0.248535
698	Protein of unknown function	3	R10E4.6	R10E4.6	R10E4.6	261	119	142	336	301	35	404	362	42	0	3.381	1.75745
699	Protein containing two BRO1-like domains, which are found in some proteins involved in signal transduction, has low similarity to C. albicans Enx3p, which is involved in pH signaling	3	ynk1/R10E12.1	R10E12.1	R10E12.1	1070	125	945	1093	305	788	1316	367	949	0	0.996	-0.00578235
700	Protein of unknown function	X	R11.3	R11.3	R11.3	305	125	180	446	315	131	537	379	158	0	1.139	0.187768
701	Protein of unknown function, has moderate similarity to uncharacterized C. elegans C01C10.3	4	F08G5.2	F08G5.2	F08G5.2	245	117	128	376	316	60	453	380	73	0	1.753	0.809826
702	Protein with moderate similarity to C. elegans Y43D4A.F gene product	X	F09B12.1	F09B12.1	F09B12.1	669	122	547	640	324	316	771	390	381	0	1.436	0.522056
703	Protein containing a DUF38 domain of unknown function and an F-box domain, which serve as a link between a target protein and a ubiquitin-conjugating enzyme, has high similarity to uncharacterized C. elegans F09C6.6	5	F09C6.2	F09C6.2	F09C6.2	324	132	192	383	281	102	461	338	123	0	1.561	0.642471
704	Protein containing a DX module domain	4	F09E8.1	F09E8.1	F09E8.1	357	124	233	528	276	252	636	332	304	0	0.766	-0.384584
705	Protein containing a nuclear hormone receptor C4-type zinc finger domain, which bind DNA, and a nuclear hormone receptor ligand-binding domain, has low similarity to nuclear receptor subfamily 2 group F member 6 (rat Rn.25840)	5	F09F3.10	F09F3.10	F09F3.10	199	120	79	252	270	-18	303	325	-22	0
706	Protein of unknown function, has low similarity to uncharacterized C. elegans F09F3.12	5	F09F3.7	F09F3.7	F09F3.7	441	123	318	571	269	302	687	324	363	0	0.876	-0.190997
707	Member of the 7-transmembrane chemoreceptor family of G protein-coupled receptors (GPCR), has low similarity to C. elegans ODR-10, which is a G protein-coupled receptor involved in odorant response	5	F14H3.1	F14H3.1	F14H3.1	186	135	51	231	275	-44	278	331	-53	0
708	Protein containing a DUF38 domain of unknown function and an F-box domain, which serve as a link between a target protein and a ubiquitin-conjugating enzyme, has a region of low similarity to C. elegans FOG-2	5	F14H3.7	F14H3.7	F14H3.7	213	140	73	271	290	-19	326	349	-23	0
709	Protein containing an F-box domain, which serve as a link between a target protein and a ubiquitin-conjugating enzyme, has moderate similarity to uncharacterized C. elegans Y46G5A.7	2	F15A4.2	F15A4.2	F15A4.2	818	154	664	990	305	685	1192	367	825	0	0.805	-0.312939
710	Protein of unknown function, has moderate similarity to C. elegans F35F10.11, ZK938.4, and T20D4.6	2	F15A4.9	F15A4.9	F15A4.9	217	161	56	257	302	-45	309	363	-54	0
711	Putative paralog of C. elegans C38D9.2 gene product	2	F15D4.5	F15D4.5	F15D4.5	357	146	211	437	301	136	526	362	164	0	1.287	0.364012
712	Member of the 7-transmembrane chemoreceptor family of G protein-coupled receptors (GPCR), has high similarity to uncharacterized C. elegans F15H9.3	1	F15H9.4	F15H9.4	F15H9.4	207	141	66	283	296	-13	340	356	-16	0
713	Protein of unknown function, has a region of weak similarity to a region of a cell surface flocculin (S. cerevisiae Muc1p), which is required for invasive and pseudohyphal growth	4	K08E7.5	K08E7.5	K08E7.5	320	138	182	350	286	64	421	344	77	0	2.364	1.24123
714	Protein of unknown function, has a region of weak similarity to S. cerevisiae Ctf18p, which is required for accurate chromosome transmission in mitosis and maintenance of normal telomere length and may play a role in sister chromatid cohesion	4	K08F4.1	K08F4.1	K08F4.1	1380	137	1243	1294	286	1008	1559	344	1215	0	1.023	0.0328061
715	Alpha1,3 fucosyltransferase	2	CEFT-1/K08F8.3	K08F8.3	K08F8.3	733	135	598	909	278	631	1095	334	761	0	0.786	-0.347399
716	Protein of unknown function, has weak similarity to C. elegans K08H2.2	X	K08H2.3	K08H2.3	K08H2.3	373	129	244	397	273	124	478	328	150	0	1.627	0.702214
717	Member of the cytochrome P450 family, has low similarity to cytochrome P450 subfamily 2E polypeptide 1(mouse Cyp2e1), which is an ethanol-inducible monooxygenase involved in xenobiotic, lipid, and drug metabolism, and in cytotoxicity	X	K09A11.3	K09A11.3	K09A11.3	320	123	197	415	273	142	500	328	172	0	1.145	0.195348
718	Member of the nucleoside transporter family, which transport nucleosides across the plasma, and possibly nuclear, membrane, has low similarity to equilibrative nucleoside transporter 1 (human SLC29A1), which transports nucleosides	X	K09A9.3	K09A9.3	K09A9.3	1505	131	1374	1423	281	1142	1714	338	1376	0	0.999	-0.00144342
719	Member of the alcohol dehydrogenase protein family	5	R04B5.5	R04B5.5	R04B5.5	647	131	516	721	292	429	868	351	517	0	0.998	-0.00288828
720		X		multiple	R04D3.1	239	125	114	306	289	17	368	348	20	0	5.7	2.51096
721	Member of the dwarfin family, has low similarity to MAD (mothers against decapentaplegic, Drosophila) homolog 1 (rat Madh1), which is a transcription factor that is phosphorylated and regulated in response to members of the TGF-beta superfamily	1	R05D11.1	R05D11.1	R05D11.1	292	121	171	487	294	193	586	354	232	0	0.737	-0.440263
722	Protein of unknown function, has low similarity to uncharacterized C. elegans Y57A10B.6	2	R06A4.6	R06A4.6	R06A4.6	283	124	159	356	299	57	428	360	68	0	2.338	1.22527
723		1		no_gene	R06C7.9	824	137	687	890	309	581	1072	372	700	0	0.981	-0.027675
724	Protein containing one clathrin and vacuolar protein sorting-associated (VPS) protein 7-fold repeat domain, has low similarity to uncharacterized human VPS11	2	R06F6.2	R06F6.2	R06F6.2	421	143	278	570	313	257	686	377	309	0	0.9	-0.152003
725	Protein containing two C-type lectin domains, has a region of low similarity to regeneration protein (lithostatin, pancreatic stone protein, rat Reg1), which induces pancreatic beta cell regeneration and ameliorates diabetes	5	T25E12.9	T25E12.9	T25E12.9	296	145	151	370	317	53	445	381	64	0	2.359	1.23818
726	Member of the glycerol-3-phosphate dehydrogenase, mitochondrial protein family	1	T25G3.4	T25G3.4	T25G3.4	1677	157	1520	1679	340	1339	2022	409	1613	0	0.942	-0.086201
727	Member of an uncharacterized protein family	5	T26E4.7	T26E4.7	T26E4.7	308	128	180	457	322	135	550	387	163	0	1.104	0.14274
728	Protein with high similarity to S. cerevisiae Rrp3p, which is a helicase required for maturation of pre-rRNA, member of the DEAD or DEAH box ATP-dependent RNA helicase family and contains a helicase conserved C-terminal domain	3	T26G10.1	T26G10.1	T26G10.1	1159	133	1026	1200	324	876	1445	390	1055	0	0.973	-0.0394883
729	Protein containing an F-box domain, which serve as a link between a target protein and a ubiquitin-conjugating enzyme, has high similarity to uncharacterized C. elegans T26H2.3	5	T26H2.1	T26H2.1	T26H2.1	258	128	130	331	282	49	398	339	59	0	2.203	1.13947
730	Protein containing an F-box domain, which serve as a link between a target protein and a ubiquitin-conjugating enzyme, has moderate similarity to uncharacterized C. elegans T26H2.2	5	T26H2.4	T26H2.4	T26H2.4	332	128	204	492	280	212	592	337	255	0	0.8	-0.321928
731	Member of the trehalase family, which are O-glycosyl hydrolases, has moderate similarity to trehalase (human TREH), which catalyzes the hydrolysis of the disaccharide alpha, alpha-trehalose and plays a role in digestion and metabolism of carbohydrates	5	W05E10.4	W05E10.4	W05E10.4	701	124	577	964	279	685	1161	336	825	0	0.699	-0.516636
732	Putative paralog of C. elegans F54F7.7, has similarity over the C-terminal half to S. cerevisiae cell cycle arrest protein Pch1p	X	W06D11.4	W06D11.4	W06D11.4	245	122	123	332	278	54	400	334	66	0	1.864	0.898402
733	Protein with high similarity to glutamate synthase (NADPH, GOGAT, S. cerevisiae Glt1), member of the pyridine nucleotide-disulphide oxidoreductase family, contains a conserved region in glutamate synthase domain and a DUF14 domain of unknown function	X	W07E11.1	W07E11.1	W07E11.1	1664	129	1535	1143	279	864	1377	336	1041	0	1.475	0.560715
734	Protein of unknown function	5	W07G4.5	W07G4.5	W07G4.5	2835	135	2700	1852	292	1560	2231	351	1880	0	1.436	0.522056
735	Protein with high similarity to C. elegans FAT-4, which is a delta5-fatty acid desaturase	4	fat-3/W08D2.4	W08D2.4	W08D2.4	7196	145	7051	5371	303	5068	6471	365	6106	0	1.155	0.207893
736	Protein containing two collagen triple helix repeats, which are found in some extracellular proteins and a nematode cuticle collagen N-terminal domain, has moderate similarity to C. elegans SQT-1, which is a collagen	4	W08D2.6	W08D2.6	W08D2.6	964	156	808	736	301	435	886	362	524	0	1.542	0.624803
737	Member of the glycosyl hydrolase 18 family, contains two chitin binding peritrophin-A domains, has moderate similarity to chitinase 1 (chitotriosidase, human CHIT1), which catalyzes the hydrolysis of chitin and is associated with Gaucher disease	X	cht-1/CHT1/C04F6.3	C04F6.3	C04F6.3	1465	150	1315	688	304	384	828	366	462	0	2.846	1.50894
738	Protein of unknown function, has weak similarity to human Hs.198760 and Hs.75735 heavy neurofilament subunit	5	C05C8.4	C05C8.4	C05C8.4	611	141	470	559	303	256	673	365	308	0	1.526	0.609755
739	Protein containing a BTB (BR-C, ttk and babor) or POZ (Pox virus and zinc finger) domain, which are found in some DNA and actin binding proteins, has a region of low similarity to a region of kelch-like 2 (Mayven, human KLHL2)	5	C05C8.6	C05C8.6	C05C8.6	759	135	624	769	292	477	926	351	575	0	1.085	0.117695
740	Protein containing two pyridoxal-dependent group II decarboxylase conserved domains, which bind pyridoxal-phosphate groups, has moderate similarity to dopa decarboxylase (aromatic L-amino acid decarboxylase, rat Ddc)	3	C05D2.3	C05D2.3	C05D2.3	319	135	184	282	290	-8	339	349	-10	0
741	Protein involved in germ cell development	3	C05D2.5	C05D2.5	C05D2.5	835	128	707	687	281	406	827	338	489	0	1.446	0.532068
742	Protein with high similarity to extracellular signal-regulated kinase 7 (rat ERK7), which is a protein serine-threonine kinase that inhibits cell proliferation and may regulate intracellular chloride channels, contains a protein kinase domain	3	C05D10.2	C05D10.2	C05D10.2	386	130	256	392	268	124	472	322	150	0	1.707	0.771463
743	Protein containing a kringle domain, two low-density lipoprotein (LDL) receptor class A domains, a PAN domain, and a C-type lectin domain	4	C07G1.2	C07G1.2	C07G1.2	506	126	380	388	262	126	467	315	152	0	2.5	1.32193
744	Protein containing a FYVE zinc finger domain, a ubiquitin interaction motif, and a VHS domain of unknown function, has moderate similarity to hepatocyte growth factor regulated tyrosine kinase substrate (human HGS)	4	C07G1.5	C07G1.5	C07G1.5	1388	136	1252	1479	283	1196	1781	340	1441	0	0.869	-0.202572
745	Protein containing an RNA recognition motif (RRM, RBD, or RNP) and a Surp module (SWAP domain), which may bind RNA, has low similarity to uncharacterized human KIAA0332	3	C07H6.4	C07H6.4	C07H6.4	1640	145	1495	1479	310	1169	1781	373	1408	0	1.062	0.0867838
746	Protein containing an F-box domain, which serve as a link between a target protein and a ubiquitin-conjugating enzyme, and a DUF38 domain of unknown function, has low similarity to C. elegans T07D3.1, which may serve in germ-line stem cell differentiation	2	C08E3.5	C08E3.5	C08E3.5	864	143	721	1089	305	784	1312	367	945	0	0.763	-0.390245
747	Protein containing an F-box domain, which serve as a link between a target protein and a ubiquitin-conjugating enzyme, and a DUF38 domain of unknown function, has low similarity to C. elegans T07D3.1, which may function in germ-line cell differentiation	2	C08E3.8	C08E3.8	C08E3.8	285	132	153	421	297	124	507	357	150	0	1.02	0.0285692
748	Protein containing a DUF38 domain of unknown function, has a region of low similarity to a region of C. elegans T07D3.1, which functions in gametogenesis and positive regulation of body size	2	C08E3.12	C08E3.12	C08E3.12	296	132	164	368	303	65	443	365	78	0	2.103	1.07245
749	Protein with weak similarity to C. elegans C34D4.15 gene product	1	C48E7.5	C48E7.5	C48E7.5	318	131	187	401	315	86	483	379	104	0	1.798	0.846393
750	Member of the uncharacterized protein family UPF0063, has weak similarity to uncharacterized C. elegans F52F10.4	1	C48E7.8	C48E7.8	C48E7.8	244	131	113	426	308	118	513	371	142	0	0.796	-0.32916
751	Protein of unknown function, has high similarity to uncharacterized C. elegans C49A9.9	4	C49A9.5	C49A9.5	C49A9.5	1120	124	996	1895	310	1585	2283	373	1910	0	0.521	-0.940645
752	Member of the reverse transcriptase family, which are RNA-dependent DNA polymerases, has strong similarity to uncharacterized C. elegans M01A10.4	2	C49D10.1	C49D10.1	C49D10.1	205	132	73	313	321	-8	377	386	-9	0
753	Member of the zinc finger protein family with similarity to nuclear hormone receptors	2	nhr-75/C49D10.6	C49D10.6	C49D10.6	221	135	86	327	319	8	393	384	9	0	9.556	3.25641
754	Protein containing a DHHC-type zinc finger NEW1 domain, has a region of low similarity to a region of Huntingtin interacting protein H (human HYPH), which interacts with huntingtin (human HD) and may play a role in Huntington disease	5	AC3.4	AC3.4	AC3.4	502	137	365	796	323	473	959	389	570	0	0.64	-0.643856
755	Protein of unknown function, has high similarity to uncharacterized C. elegans K09F6.7	2	B0281.3	B0281.3	B0281.3	822	137	685	1189	288	901	1432	346	1086	0	0.631	-0.664288
756	Member of the M1 peptidase family of aminopeptidases	3	B0285.7	B0285.7	B0285.7	507	136	371	471	280	191	567	337	230	0	1.613	0.689746
757	Member of the cytochrome P450 family, has low similarity to cytochrome P450 subfamily 4A polypeptide 11 fatty acid omega-hydroxylase (rat Cyp4a11), which hydroxylates steroids, fatty acids, and xenobiotics and is involved in blood pressure regulation	5	B0331.1	B0331.1	B0331.1	357	130	227	484	283	201	583	340	243	0	0.934	-0.0985055
758	Beta-catenin-related protein required for establishment of embryonic polarity; member of a divergent Wnt signaling pathway	3	wrm-1/B0336.1	B0336.1	B0336.1	839	126	713	696	284	412	838	342	496	0	1.438	0.524064
759	Putative phosphatidylinositol phospholipase C	5	egl-8/pbo-2/B0348.4/B0348.3	B0348.4	B0348.3	331	124	207	542	278	264	653	334	319	0	0.649	-0.62371
760	Member of the sugar (and other) transporter family, has a region of weak similarity to solute carrier family 22 (organic cation transporter) member 2 (rat Slc22a2)	3	B0361.3	B0361.3	B0361.3	351	121	230	616	283	333	742	340	402	0	0.572	-0.805913
761	Protein containing a protein kinase domain, has low similarity to casein kinase 1 epsilon (mouse Csnk1e), which is a putative serine-threonine protein kinase with broad substrate specificity that may act in DNA repair and regulation of circadian rhythm	4	C27D8.1	C27D8.1	C27D8.1	300	123	177	321	289	32	386	348	38	0	4.658	2.21971
762		3		multiple	C27F2.3	348	126	222	300	289	11	361	348	13	0	17.077	4.09398
763	Protein of unknown function, has weak similarity to S. cerevisiae Yol072p and Yjr084p	3	C27F2.7	C27F2.7	C27F2.7	946	133	813	837	299	538	1008	360	648	0	1.255	0.327687
764	Protein of unknown function, has strong similarity to uncharacterized C. elegans C28A5.2	3	C28A5.1	C28A5.1	C28A5.1	714	136	578	528	299	229	636	360	276	0	2.094	1.06626
765	Putative ortholog of C. elegans K09C6.1 gene product	3	C28A5.6	C28A5.6	C28A5.6	335	135	200	533	293	240	642	353	289	0	0.692	-0.531156
766	Protein with weak similarity to very-long-chain acyl-coenzyme A dehydrogenase (rat Acadvl), which is a rate-controlling enzyme in beta-oxidation of long-chain fatty acids	4	C28C12.9	C28C12.9	C28C12.9	811	134	677	556	286	270	669	344	325	0	2.083	1.05866
767	Member of the AMP-binding enzyme family, has low similarity to uncharacterized C. elegans C50H11.1	1	C32E8.6	C32E8.6	C32E8.6	365	134	231	349	280	69	420	337	83	0	2.783	1.47664
768	Putative coiled-coil protein, has weak similarity over the N-terminus to S. cerevisiae mRNA cap-binding protein Tif4632p	1	C32E12.1	C32E12.1	C32E12.1	272	132	140	477	278	199	574	334	240	0	0.583	-0.778432
769	Protein containing a high mobility group box (HMG1 or 2) family domain, has a region of high similarity to a region of SRY box 11 (human SOX11), which is a transcriptional activator that may serve in neural differentiation and retrotransposon regulation	1	C32E12.3	C32E12.3	C32E12.3	389	128	261	369	270	99	444	325	119	0	2.193	1.13291
770	Similar to the Rb tumor suppressor; negative regulator of the cell cycle, and part of the class B pathway that antagonizes vulval induction	1	lin-35/C32F10.2	C32F10.2	C32F10.2	1080	129	951	1000	281	719	1204	338	866	0	1.098	0.134878
771	Member of the DNA replication related (tentative) protein family	1	C32F10.5	C32F10.5	C32F10.5	2077	144	1933	1812	303	1509	2183	365	1818	0	1.063	0.0881416
772	Protein containing a DUF215 domain of unknown function, has high similarity to uncharacterized C. elegans C33A12.13	4	C33A12.14	C33A12.14	C33A12.14	238	143	95	325	301	24	391	362	29	0	3.276	1.71194
773	Member of the zinc finger protein family with similarity to nuclear hormone receptors, may be involved in epidermal fate specification	1	nhr-89/E03H4.13	E03H4.13	E03H4.13	197	135	62	344	292	52	414	351	63	0	0.984	-0.0232698
774	Protein of unknown function, has high similarity to uncharacterized C. elegans E03H12.2	4	E03H12.3	E03H12.3	E03H12.3	270	134	136	363	300	63	437	361	76	0	1.789	0.839153
775	Protein containing an F-box domain, which serve as a link between a target protein and a ubiquitin-conjugating enzyme, has moderate similarity to uncharacterized C. elegans Y17G9B.7	4	E04A4.1	E04A4.1	E04A4.1	289	121	168	301	311	-10	362	374	-12	0
776	Member of the metallo-beta-lactamase family, has low similarity to uncharacterized human ELAC2	4	E04A4.4	E04A4.4	E04A4.4	718	120	598	740	312	428	891	375	516	0	1.159	0.212881
777	Putative ortholog of S. cerevisiae Ygr054p, a protein of unknown function	2	E04D5.1	E04D5.1	E04D5.1	1737	139	1598	1260	325	935	1518	391	1127	0	1.418	0.503858
778	Protein of unknown function, has strong similarity to uncharacterized C. elegans E04F6.13	2	E04F6.1	E04F6.1	E04F6.1	229	141	88	336	327	9	404	393	11	0	8	3
779	Member of the rhodopsin family of G protein-coupled receptors (GPCR), has low similarity to G protein-coupled receptor FM-3 (rat Gpr66), which is predicted to bind neuromedin U (rat Nmu)	X	F02E8.2	F02E8.2	F02E8.2	270	129	141	402	311	91	484	374	110	0	1.282	0.358396
780	Protein containing seven WD domains (WD-40 repeat), which may mediate protein-protein interactions, has weak similarity to S. cerevisiae Mdv1p, which is a protein involved in mitochondrial division	X	F02E8.5	F02E8.5	F02E8.5	771	136	635	840	321	519	1012	386	626	0	1.014	0.0200577
781	Protein containing a paired amphipathic helix repeat, which may mediate protein-protein interactions, has weak similarity to transcriptional regulator SIN3 yeast homolog B (mouse Sin3b), which functions as a transcriptional co-repressor	1	F02E9.4	F02E9.4	F02E9.4	1197	136	1061	935	284	651	1126	342	784	0	1.353	0.436162
782	Member of the purple acid phosphatase family, which catalyze hydrolysis of phosphate esters, has moderate similarity to human ACP5, which is a binuclear redox-sensitive iron-containing lysosomal phosphatase secreted into serum during bone resorption	1	F02E9.7	F02E9.7	F02E9.7	1484	143	1341	1317	289	1028	1586	348	1238	0	1.083	0.115033
783	Member of the ABC transporter family, has low similarity to ATP-binding cassette subfamily G member 1 (mouse Abcg1), which is an ABC transporter involved in cellular sterol homeostasis	2	F02E11.1	F02E11.1	F02E11.1	204	135	69	288	284	4	346	342	4	0	17.25	4.10852
784	Putative ortholog of C. elegans K01G12.3 gene product	4	F02H6.2	F02H6.2	F02H6.2	717	130	587	581	290	291	700	349	351	0	1.672	0.741575
785	Protein of unknown function	1	F21F3.4	F21F3.4	F21F3.4	653	129	524	641	288	353	772	346	426	0	1.23	0.298658
786	Protein of unknown function	X	F21G4.6	F21G4.6	F21G4.6	304	126	178	282	286	-4	339	344	-5	0
787	Protein containing two receptor family ligand binding domains, an adenylate and guanylate cyclase catalytic domain, and a protein kinase domain, has low similarity to natriuretic peptide receptor A (mouse Npr1)	5	gcy-20/gcy-16/F21H7.9	F21H7.9	F21H7.9	328	128	200	534	290	244	643	349	294	0	0.68	-0.556393
788	Protein containing three WD domains (WD-40 repeat), which may mediate protein-protein interactions, has moderate similarity to human RBBP5, which binds preferentially to the E1A-binding pocket B of underphosphorylated retinoblastoma protein	2	F21H12.1	F21H12.1	F21H12.1	1009	133	876	862	299	563	1038	360	678	0	1.292	0.369606
789	RNA-binding protein involved in sex determination	2	fbf-2/F21H12.5	F21H12.5	F21H12.5	629	134	495	526	302	224	633	363	270	0	1.833	0.874207
790	Protein containing a sterile alpha motif (SAM) or pointed domain, which are a type of SAM domain in nuclear and signalling proteins, and an ETS domain, which bind promoter DNA, has low similarity to a region of prostate-derived Ets factor (mouse Pdef)	X	F22A3.1	F22A3.1	F22A3.1	856	134	722	878	303	575	1057	365	692	0	1.043	0.0607392
791	Putative ATPase subunit of 19S proteasome particle	2	rpt-4/F23F1.8	F23F1.8	F23F1.8	2267	139	2128	1639	299	1340	1974	360	1614	0	1.318	0.39835
792	Putative ATPase subunit of 19S proteasome particle	3	rpt-3/F23F12.6	F23F12.6	F23F12.6	1830	145	1685	1286	290	996	1549	349	1200	0	1.404	0.489543
793	Protein of unknown function	3	F23H11.2	F23H11.2	F23H11.2	406	143	263	352	283	69	424	340	84	0	3.131	1.64662
794	Protein containing a RhoGAP (GTPase activator protein) and two pleckstrin homology (PH) domains, which mediate protein-protein and protein-lipid interactions, has region of low similarity to a region of rho GTPase-activating protein 5 (mouse Arhgap5)	3	F23H11.4	F23H11.4	F23H11.4	675	135	540	660	287	373	795	345	450	0	1.2	0.263034
795	Protein of unknown function	5	F25B3.5	F25B3.5	F25B3.5	331	132	199	381	291	90	459	350	109	0	1.826	0.868687
796	Protein of unknown function, has moderate similarity to uncharacterized human PELI1	5	pellino/F25B4.2	F25B4.2	F25B4.2	662	135	527	641	294	347	772	354	418	0	1.261	0.334568
797	Protein with low similarity to metaxin (mouse Mtx), which is an outer mitochondrial membrane protein that plays a role in protein import and is required for embryonic development	1	F39B2.11	F39B2.11	F39B2.11	831	136	695	729	300	429	878	361	517	0	1.344	0.426533
798	Protein containing four BTB (BR-C, ttk and babor) or POZ (Pox virus and zinc finger) domains, which are found in some DNA and actin binding proteins and may mediate protein-protein interactions	2	F39E9.2	F39E9.2	F39E9.2	957	132	825	1625	302	1323	1957	363	1594	0	0.518	-0.948976
799	Member of the M13 peptidase family of zinc metalloproteases, has weak similarity to endothelin-converting enzyme 1 (human ECE1), which is a zinc metalloprotease that generates the endothelin vasoconstrictors and is associated with Hirschsprung disease	2	F39E9.4	F39E9.4	F39E9.4	233	135	98	340	301	39	409	362	47	0	2.085	1.06005
800	Protein containing a protein kinase domain, has a region of low similarity to a region of S. pombe Hhp2p, which is a casein kinase I homolog	X	F39F10.3	F39F10.3	F39F10.3	416	134	282	528	303	225	636	365	271	0	1.041	0.0579701
801	Protein containing a DUF33 domain of unknown function, has high similarity to uncharacterized C. elegans Y67A10A.1	5	F39G3.6	F39G3.6	F39G3.6	141	129	12	333	311	22	401	374	27	0	0.444	-1.17137
802	Protein containing a protein kinase domain, has low similarity to S. cerevisiae Slt2p, which is a serine/threonine protein kinase involved in the cell wall integrity (low-osmolarity) pathway	1	F39H11.3	F39H11.3	F39H11.3	667	128	539	798	321	477	961	386	575	0	0.937	-0.093879
803	Protein with high similarity to C. elegans DPY-16, which is a collagen, contains two collagen triple helix repeats, which are found in some extracellular proteins, and a nematode cuticle collagen N-terminal domain	5	F41F3.4	F41F3.4	F41F3.4	2035	152	1883	4586	331	4255	5525	398	5127	0	0.367	-1.44615
804		2		F41G3.2	F41G3.2	323	147	176	525	325	200	632	391	241	0	0.73	-0.454032
805		2		F41G3.5	F41G3.5	314	131	183	539	317	222	649	381	268	0	0.683	-0.550043
806	Putative ortholog of C. elegans ZC15.1 gene product	m	F41G4.5	F41G4.5	F41G4.5	207	126	81	295	318	-23	355	383	-28	0
807	Putative ortholog of C. elegans F41G4.6 gene product	X	F41G4.7	F41G4.7	F41G4.7	368	129	239	318	282	36	383	339	44	0	5.432	2.44148
808	Protein containing a HORMA domain, which may recognize chromatin states, has low similarity to C. elegans HIM-3, which is a meiosis-specific protein localized to chromosome cores that may play a role in sister chromatid cohesion	4	F41H10.10	F41H10.10	F41H10.10	1733	140	1593	1572	290	1282	1893	349	1544	0	1.032	0.045443
809	Member of the 7-transmembrane chemoreceptor family of G protein-coupled receptors (GPCR), has low similarity to C. elegans ODR-10, which is a G protein-coupled receptor that is involved in odorant response	5	ZK697.10	ZK697.10	ZK697.10	302	144	158	287	286	1	345	344	1	0	158	7.30378
810	Protein containing fifteen epidermal growth factor (EGF)-like domains, has weak similarity to fibrillin-1 (mouse Fbn1), which is an extracellular matrix protein of connective tissue microfibrils that is associated with the tight skin (Tsk) disorder	3	ZK783.1	ZK783.1	ZK783.1	334	134	200	314	288	26	378	346	32	0	6.25	2.64386
811	Protein containing a zinc finger domain and a putative bromodomain, has weak similarity to human WBSCR10 (Williams-Beuren syndrome chromosome region 10 and region 9)	3	flt-1/ZK783.4	ZK783.4	ZK783.4	603	130	473	448	292	156	539	351	188	0	2.516	1.33113
812	Protein containing eight ankyrin (Ank) repeats, which may mediate protein-protein interactions, has low similarity to a region of espin (rat Espn), which is an actin bundling protein associated with deafness upon loss of function	4	ZK792.4	ZK792.4	ZK792.4	404	129	275	343	292	51	413	351	62	0	4.435	2.14893
813	Member of an uncharacterized protein family	4	ZK809.4	ZK809.4	ZK809.4	1388	133	1255	1051	292	759	1266	351	915	0	1.372	0.45628
814	Member of the sodium:solute symporter family of membrane transporters, has low similarity to rat Slc5a6, which is a sodium-dependent multivitamin transporter that mediates the electrogenic uptake of pantothenate, biotin, and lipoate by cells	4	ZK822.5	ZK822.5	ZK822.5	865	135	730	643	295	348	774	355	419	0	1.742	0.800745
815	Protein with high similarity to solute carrier family 25 member 4 (mouse Slc25a4), which is an adenine nucleotide translocator that functions in metabolism and apoptosis, member of the mitochondrial carrier protein family of membrane transporters	4	T01B11.4	T01B11.4	T01B11.4	672	134	538	764	298	466	920	359	561	0	0.959	-0.0603973
816	Member of the 4 TM potassium channel protein family	X	twk-16/T01B4.1	T01B4.1	T01B4.1	294	133	161	327	293	34	393	353	40	0	4.025	2.00899
817	Protein of unknown function	5	T01C3.8	T01C3.8	T01C3.8	999	134	865	737	287	450	887	345	542	0	1.596	0.674461
818	Member of the rhodopsin family of G-protein coupled receptors (GPCR), has low similarity to uncharacterized C. elegans K09D9.10	5	T01C4.6	T01C4.6	T01C4.6	199	129	70	244	283	-39	293	340	-47	0
819	Protein with high similarity to soluble glutamate-oxaloacetate transaminase (cytosolic aspartate aminotransferase, mouse Got1), which transaminates 2-oxoglutarate, contains an aminotransferase class I and II domain	X	T01C8.5	T01C8.5	T01C8.5	1179	129	1050	907	283	624	1092	340	752	0	1.396	0.481299
820	Protein containing eight uncharacterized DUF139 cysteine repeat domains	2	T01D1.6	T01D1.6	T01D1.6	446	131	315	441	285	156	531	343	188	0	1.676	0.745022
821	Protein of unknown function, has a region of low similarity to a region of sialophorin (leukosialin, human SPN), which is an integral membrane protein that binds ICAM-1 and has roles in T-cell activation and neutrophil migration	2	T19D12.1	T19D12.1	T19D12.1	878	131	747	1142	291	851	1375	350	1025	0	0.729	-0.456009
822	Protein containing a von Willebrand factor (vWF) type A domain	2	T19D12.4	T19D12.4	T19D12.4	1347	134	1213	1064	297	767	1281	357	924	0	1.313	0.392867
823	Member of the sugar (and other) transporter family, has low similarity to solute carrier family 17 member 1 (human SLC17A1), which is involved in sodium-dependent phosphate transport and mediates organic anion transport at the renal apical membrane	2	T19D12.9	T19D12.9	T19D12.9	396	132	264	337	303	34	406	365	41	0	6.439	2.68684
824	Protein containing a RUN domain, which may be involved in Ras-like GTPase signaling pathways	X	T19D7.4	T19D7.4	T19D7.4	334	131	203	410	304	106	493	366	127	0	1.598	0.676267
825	Member of the UDP-glucuronosyltransferase protein family	5	T19H12.1	T19H12.1	T19H12.1	401	133	268	486	303	183	585	365	220	0	1.218	0.284514
826	Protein containing a UDP-glucoronosyl and UDP-glucosyl transferase domain, has low similarity to UDP glycosyltransferase 2 family polypeptide B15 (human UGT2B15), which glucuronidates steroids and several xenobiotics	5	T19H12.11	T19H12.11	T19H12.11	572	134	438	664	303	361	800	365	435	0	1.007	0.0100637
827	Protein of unknown function, has low similarity to uncharacterized human HCC8	5	vps-54/T21C9.2	T21C9.2	T21C9.2	796	132	664	738	311	427	889	374	515	0	1.289	0.366252
828	Protein containing two collagen triple helix repeats, has moderate similarity to a region of type XI collagen alpha 1 (human COL11A1), which is a component of cartilage and the vitreous of the eye and is associated with Type 2 Stickler syndrome	4	T21D12.2	T21D12.2	T21D12.2	474	131	343	515	317	198	620	381	239	0	1.435	0.521051
829	Member of the 7-transmembrane chemoreceptor family of G-protein coupled receptors (GPCR), has moderate similarity to uncharacterized C. elegans C47A10.2	4	T21D12.5	T21D12.5	T21D12.5	282	135	147	1009	325	684	1215	391	824	0	0.178	-2.49005
830	Protein containing two collagen triple helix repeats and one nematode cuticle collagen N-terminal domain, has moderate similarity to a region of alpha 1 subunit of type XI collagen (mouse Col11a1), which functions in the development of the skeletal system	X	T21D9.1	T21D9.1	T21D9.1	1336	138	1198	802	324	478	966	390	576	0	2.08	1.05658
831	Member of the protein-tyrosine phosphatase family, has a region of low similarity to a region of protein tyrosine phosphatase non-receptor type 9 (human PTPN9), which is a non-membrane spanning tyrosine phosphatase that may be associated with autism	1	T21E3.1	T21E3.1	T21E3.1	1027	132	895	786	321	465	946	386	560	0	1.598	0.676267
832	Member of the ABC transporter family, which are involved in translocation of a variety of compounds across biological membranes, contains two ABC transporter transmembrane domains, has moderate similarity to C. elegans C47A10.1	X	T21E8.2	T21E8.2	T21E8.2	398	124	274	401	328	73	483	395	88	0	3.114	1.63877
833	Member of the calpain family of cysteine proteases, has a region of low similarity to a region of calpain 2 (rat Capn2), which is the large subunit of the cysteine-type protease m-calpain that regulates apoptosis and signal transduction	1	F44F1.3	F44F1.3	F44F1.3	205	124	81	290	279	11	349	336	13	0	6.231	2.63946
834	Protein of unknown function, has strong similarity to uncharacterized C. elegans F42G4.6	2	F44F4.10	F44F4.10	F44F4.10	461	129	332	995	292	703	1198	351	847	0	0.392	-1.35107
835	Protein containing five DUF38 domains of unknown function and three F-box domains, which link a target protein with a ubiquitin-conjugating enzyme, has a region of low similarity to C. elegans FOG-2, which is required for germ cells sexual identity	5	F44G3.8	F44G3.8	F44G3.8	341	136	205	367	292	75	442	351	91	0	2.253	1.17185
836	Member of the protein-tyrosine phosphatase family, which are involved in cell growth, contains two fibronectin type III domains, which are involved in cell surface binding, has weak similarity to protein tyrosine phosphatase receptor type J (human PTPRJ)	2	F44G4.8	F44G4.8	F44G4.8	399	134	265	395	288	107	475	346	129	0	2.054	1.03844
837	Protein of unknown function	2	F45C12.2	F45C12.2	F45C12.2	282	131	151	305	292	13	367	351	16	0	9.438	3.23848
838	Protein containing an F-box domain, which serve as a link between a target protein and a ubiquitin-conjugating enzyme, has low similarity to uncharacterized C. elegans F36H5.5	2	F45C12.5	F45C12.5	F45C12.5	256	131	125	292	293	-1	351	353	-2	0
839	Member of the patched family, which are transmembrane receptors	X	F46G10.5	F46G10.5	F46G10.5	765	131	634	690	291	399	831	350	481	0	1.318	0.39835
840	Protein of unknown function	X	F46G11.1	F46G11.1	F46G11.1	417	130	287	430	288	142	518	346	172	0	1.669	0.738984
841	Protein containing a protein kinase domain, has low similarity to microtubule- and MAP-affinity regulating kinase (rat LOC60328), which is a serine-threonine kinase that participates in microtubule stability and the control of cell polarity	X	F46G11.3	F46G11.3	F46G11.3	546	133	413	671	291	380	808	350	458	0	0.902	-0.148801
842	Protein of unknown function, has low similarity to uncharacterized human KIAA1395	X	F46H5.4	F46H5.4	F46H5.4	753	134	619	619	290	329	745	349	396	0	1.563	0.644318
843	Protein with strong similarity to C. elegans GRD-6, has weak similarity to C. elegans MUC1, transmembrane mucin 1	X	grd-7/F46H5.6	F46H5.6	F46H5.6	757	134	623	618	285	333	744	343	401	0	1.554	0.635987
844	Protein containing a RhoGAP (GTPase activator protein) domain, has a region of moderate similarity to a region of cdc42 GTPase-activating protein (mouse Cdgap), which acts on Cdc42 and Rac but not Rho and and functions in actin reorganization	X	F47A4.3	F47A4.3	F47A4.3	564	127	437	617	282	335	743	339	404	0	1.082	0.1137
845	Protein containing neurotransmitter-gated ion-channel ligand binding and transmembrane domains, has moderate similarity to C. elegans MOD-1, which is a serotonin-gated chloride channel	5	K10D6.1	K10D6.1	K10D6.1	309	119	190	433	283	150	521	340	181	0	1.05	0.0703893
846	Protein containing a DUF141 domain of unknown function, has high similarity to uncharacterized C. elegans K10D11.3	4	K10D11.6	K10D11.6	K10D11.6	566	126	440	668	284	384	804	342	462	0	0.952	-0.0709665
847	Protein containing phosphatidylinositol-specific phospholipase C X and C Y domains and a C2 domain, has moderate similarity to phospholipase C epsilon (rat LOC84587), which is a phospholipase C that mediates ras-induced signal transduction	3	K10F12.3	K10F12.3	K10F12.3	633	126	507	470	289	181	566	348	218	0	2.326	1.21785
848	Protein containing two DUF38 domains of unknown function and an F-box domain, which serve as a link between a target protein and a ubiquitin-conjugating enzyme, has weak similarity to uncharacterized C. elegans T06E6.5	5	K10G4.1	K10G4.1	K10G4.1	293	126	167	463	295	168	557	355	202	0	0.827	-0.274041
849	Protein containing nine C2H2 type zinc finger domains, which bind nucleic acids	2	K10G6.3	K10G6.3	K10G6.3	1079	128	951	1078	300	778	1298	361	937	0	1.015	0.0214797
850	Member of an uncharacterized protein family	2	K10H10.3	K10H10.3	K10H10.3	274	124	150	419	302	117	504	363	141	0	1.064	0.0894982
851	Protein of unknown function, has strong similarity to uncharacterized C. elegans C31B8.11	5	srh-37/R11G11.9	R11G11.9	R11G11.9	245	121	124	227	305	-78	273	367	-94	0
852	Coiled coil protein structurally related to H. sapiens Nuf2 and S. pombe Nuf2, component of the kinetochore	3	him-10/NUF2/R12B2.4	R12B2.4	R12B2.4	708	123	585	820	307	513	987	369	618	0	0.947	-0.0785637
853	Protein with high similarity to glycine dehydrogenase (P-protein) (human GLDC), which catalyzes the decarboxylation of glycine and is associated with nonketotic hyperglycinemia, member of the glycine cleavage P-protein family	2	R12C12.1	R12C12.1	R12C12.1	903	129	774	1801	311	1490	2169	374	1795	0	0.431	-1.21424
854	Member of the rhodopsin family of G-protein coupled receptors (GPCR), has weak similarity to galanin receptor 2 (rat Galr2), which modulates adenylyl cyclase, phospholipase C and intracellular calcium and regulates jejunal contraction and pain perception	2	R12C12.3	R12C12.3	R12C12.3	332	133	199	442	319	123	532	384	148	0	1.345	0.427606
855	Protein of unknown function	1	R12E2.2	R12E2.2	R12E2.2	1889	132	1757	2295	322	1973	2765	387	2378	0	0.739	-0.436354
856	Protein with very strong similarity to C. elegans T21E3.1, which is involved in eggshell formation, member of the protein-tyrosine phosphatase family, which are involved in control of cell growth, proliferation, differentiation and transformation	1	R12E2.10	R12E2.10	R12E2.10	1052	131	921	871	326	545	1049	392	657	0	1.402	0.487486
857	Member of the transposase family, which are required for excising and inserting mobile genetic elements, has very strong similarity to uncharacterized C. elegans C31A11.2	4	F56D5.7	F56D5.7	F56D5.7	1380	135	1245	2352	328	2024	2833	395	2438	0	0.511	-0.968605
858	Member of an uncharacterized protein family	4	F56D6.5	F56D6.5	F56D6.5	246	126	120	370	322	48	445	387	58	0	2.069	1.04893
859	Putative nuclear hormone receptor involved in axon fasciculation	X	fax-1/F56E3.4	F56E3.4	F56E3.4	326	132	194	373	287	86	449	345	104	0	1.865	0.899176
860	Protein of unknown function	3	F56F11.2	F56F11.2	F56F11.2	459	131	328	409	291	118	492	350	142	0	2.31	1.20789
861	Member of the transthyretin-like family, has weak similarity to uncharacterized C. elegans T08A9.2	1	F56F4.2	F56F4.2	F56F4.2	221	130	91	324	286	38	390	344	46	0	1.978	0.984042
862	Member of the ABC transporter family, which are involved in translocation of a variety of compounds across biological membranes, has moderate similarity to a region of C. elegans CED-7	1	F56F4.6	F56F4.6	F56F4.6	242	127	115	247	287	-40	297	345	-48	0
863	Protein of unknown function	1	F57C9.7	F57C9.7	F57C9.7	588	126	462	648	290	358	780	349	431	0	1.072	0.100305
864	Member of the bicarbonate (HCO3-) exchanger family of membrane transporters, has low similarity to human SLC4A1, which exchanges chloride and bicarbonate ions and plays a role in cell shape, size control and cytoskeletal anchoring	2	F57F10.1	F57F10.1	F57F10.1	287	126	161	421	292	129	507	351	156	0	1.032	0.045443
865	Protein of unknown function, putative paralog of C. elegans F57F4.4	5	F57F4.3	F57F4.3	F57F4.3	1285	128	1157	690	292	398	831	351	480	0	2.41	1.26903
866	Putative soluble guanylyl cyclase expressed in the BAG sensory neurons	5	gcy-33/F57F5.2	F57F5.2	F57F5.2	289	127	162	336	291	45	404	350	54	0	3	1.58496
867	Protein required for coordinated locomotion	4	unc-24/F57H12.2	F57H12.2	F57H12.2	515	127	388	554	292	262	667	351	316	0	1.228	0.296311
868	Tyrosine protein kinase, member of fibroblast growth factor receptor (FGFR) and Ig superfamilies	X	egl-15/F58A3.2	F58A3.2	F58A3.2	901	130	771	760	294	466	915	354	561	0	1.374	0.458382
869	Protein containing 20 chitin binding peritrophin-A domains, has a region of low similarity to C. elegans CEJ-1, which is involved in embryogenesis and morphogenesis	X	C39D10.7	C39D10.7	C39D10.7	1495	130	1365	1126	290	836	1356	349	1007	0	1.356	0.439357
870	Member of the amiloride-sensitive sodium channel family, has similarity to human and D. melanogaster amiloride-sensitive cation channels	X	deg-1/C47C12.6/C47C12.1	C47C12.6	C47C12.6	325	124	201	444	287	157	534	345	189	0	1.063	0.0881416
871	Protein of unknown function, has similarity to C. elegans C50E3.12	5	C50E3.13	C50E3.13	C50E3.13	794	122	672	795	289	506	957	348	609	0	1.103	0.141433
872		5		multiple	C50E3.6	632	124	508	754	291	463	908	350	558	0	0.91	-0.136062
873	Protein with high similarity to calcium channel voltage-dependent alpha 1H subunit (human CACNA1H), which is a pore-forming subunit of the low voltage-gated T-type calcium channel, member of the ion transport family	X	cca-1/C54D2.5	C54D2.5	C54D2.5	376	128	248	346	297	49	416	357	59	0	4.203	2.07142
874	Member of the sodium or hydrogen exchanger family, which maintain the pH of actively metabolizing cells, has moderate similarity to solute carrier family 9 isoform 5 (sodium-hydrogen exchanger 5, human SLC9A5), which is a sodium-hydrogen antiporter	5	C54F6.13	C54F6.13	C54F6.13	602	127	475	680	299	381	819	360	459	0	1.035	0.0496308
875	Member of the COPII coat protein, Emp70p-like protein family	X	F08F1.7/Emp70	F08F1.7	F08F1.7	1090	123	967	980	304	676	1180	366	814	0	1.188	0.248535
876	Protein of unknown function, has a region of weak similarity to a region of nascent-polypeptide-associated complex alpha subunit (mouse Naca), which binds JUN and enhances JUN-mediated transcription and functions in myogenesis	X	F16F9.2	F16F9.2	F16F9.2	335	123	212	547	303	244	659	365	294	0	0.721	-0.471929
877	Member of the 7-transmembrane chemoreceptor family of G protein-coupled receptors (GPCR), has weak similarity to uncharacterized C. elegans Y47G7B.1	5	F18E3.10	F18E3.10	F18E3.10	256	122	134	381	308	73	459	371	88	0	1.523	0.606916
878	Putative paralog of C. elegans Y57G7A.4	5	F18E3.5	F18E3.5	F18E3.5	292	121	171	426	312	114	513	375	138	0	1.239	0.309176
879	Protein containing two Jumonji (jmjC) domains, has low similarity to uncharacterized C. elegans F23D12.5	X	F18E9.5	F18E9.5	F18E9.5	815	128	687	890	313	577	1072	377	695	0	0.988	-0.0174171
880	Protein of unknown function, has a region of low similarity to a region of C. elegans LIN-15B, which is a negative regulator of the LET-23 receptor-tyrosine kinase, LET-60 ras signaling pathway	5	F19F10.10	F19F10.10	F19F10.10	585	131	454	678	319	359	816	384	432	0	1.051	0.0717627
881	Member of the carboxylesterase type B family, has low similarity to C. elegans GES-1, which is a carboxylesterase expressed in gut cells	4	C01B10.4	C01B10.4	C01B10.4	430	125	305	581	319	262	700	384	316	0	0.965	-0.0513992
882	Protein of unknown function, has low similarity to uncharacterized C. elegans W01D2.5	2	C01B12.4	C01B12.4	C01B12.4	327	123	204	405	315	90	487	379	108	0	1.889	0.917623
883		X		C01C10.1	C01C10.1	716	125	591	1275	323	952	1536	389	1147	0	0.515	-0.957356
884	Member of the NAD-dependent epimerase or dehydratase family, which catalyze reactions involving nucleotide sugar substrates, has a region of weak similarity to UDP-glucuronate decarboxylase (C. neoformans Uxs1_D)	2	C01F1.3	C01F1.3	C01F1.3	477	126	351	566	330	236	681	397	284	0	1.236	0.305679
885	Protein involved in somatic sex determination and in spermatogenesis	4	fem-3/isx-3/C01F6.4	C01F6.4	C01F6.4	1154	132	1022	1195	291	904	1439	350	1089	0	0.938	-0.0923402
886		1		C01G8.2	C01G8.2	561	132	429	588	283	305	708	340	368	0	1.166	0.221568
887	Member of the 7-transmembrane chemoreceptor family of G protein-coupled receptors (GPCR), has low similarity to uncharacterized C. elegans F37B4.6	5	C04F2.4	C04F2.4	C04F2.4	199	130	69	285	280	5	343	337	6	0	11.5	3.52356
888	Protein containing two protein kinase domains, has moderate similarity to a region of mitogen activated protein kinase 7 (big mitogen activated protein kinase, mouse Mapk7), which interacts with MEK5 and is involved in EGF receptor signaling	2	C04G6.1	C04G6.1	C04G6.1	1057	125	932	703	286	417	846	344	502	0	1.857	0.892974
889	Protein containing two protein kinase domains and two adenylate and guanylate cyclase catalytic domains, has moderate similarity to a region of natriuretic peptide receptor A (mouse Npr1), which is a membrane-bound guanylate cyclase	2	C04H5.4/C04H5.4A	C04H5.4	C04H5.5	312	123	189	409	286	123	492	344	148	0	1.277	0.352759
890	Putative ortholog of C. elegans C33F10.1 gene product	3	C05B5.2	C05B5.2	C05B5.2	461	125	336	1777	284	1493	2140	342	1798	0	0.187	-2.41889
891	Member of the regulator of G protein signaling domain protein family; modulates resumption of egg-laying after starvation	3	rgs-1/C05B5.7	C05B5.7	C05B5.7	729	126	603	819	287	532	986	345	641	0	0.941	-0.0877334
892	Member of the histidine acid phosphatase family, which hydrolyze phosphate esters at low pH, has low similarity to lysosomal acid phosphatase (rat Acp2), which is a tartrate-inhibitable lysosomal enzyme	2	C05C10.4	C05C10.4	C05C10.4	1061	127	934	2069	291	1778	2492	350	2142	0	0.436	-1.1976
893	Member of the tetraspanin family, which contain an N-terminal transmembrane domain that is a signal sequence and membrane anchor, has low similarity to motility related protein 1 (CD9 antigen, human CD9), which mediates platelet activation and aggregation	X	C25G6.2	C25G6.2	C25G6.2	935	125	810	837	290	547	1008	349	659	0	1.229	0.297485
894	Member of the rhodopsin family of G protein-coupled receptors (GPCR), has low similarity to neuropeptide Y-Y1 receptor (human NPY1R), which inhibits adenylyl cyclase and induces calcium flux and is associated with a wide variety of physiological processes	X	C25G6.5	C25G6.5	C25G6.5	305	127	178	247	292	-45	297	351	-54	0
895	Protein of unknown function	X	C26B9.3	C26B9.3	C26B9.3	562	127	435	658	289	369	792	348	444	0	0.98	-0.0291463
896	Member of the astacin (M12A) family of metalloproteases, contains a CUB domain and a type 1 thrombospondin domain, has low similarity to C. elegans HCH-1, which is a putative zinc-dependent metalloprotease	1	C26C6.3	C26C6.3	C26C6.3	342	125	217	454	289	165	546	348	198	0	1.096	0.132248
897	Protein of unknown function	1	C26C6.5	C26C6.5	C26C6.5	1547	124	1423	1889	292	1597	2275	351	1924	0	0.74	-0.434403
898	Protein containing a Src homology 3 (SH3) domain, which bind proline-rich peptides	1	C26C6.8	C26C6.8	C26C6.8	243	123	120	348	292	56	419	351	68	0	1.765	0.819668
899	Protein of unknown function	1	C30F12.4	C30F12.4	C30F12.4	993	128	865	1076	298	778	1296	359	937	0	0.923	-0.115597
900	Member of the short-chain dehydrogenase-reductase family, which are NAD- or NADP-dependent oxidoreductases, has low similarity to rat Cbr, which is a broad-specificity NADPH-dependent oxidoreductase	2	C30G12.2	C30G12.2	C30G12.2	402	127	275	434	300	134	522	361	161	0	1.708	0.772308
901	Protein of unknown function, has high similarity to uncharacterized C. elegans W07A8.5	5	C31A11.6	C31A11.6	C31A11.6	222	121	101	310	303	7	373	365	8	0	12.625	3.65821
902	Protein with moderate similarity to C. elegans F47G4.1 gene product	5	C31B8.2	C31B8.2	C31B8.2	282	121	161	369	302	67	444	363	81	0	1.988	0.991318
903	Protein of unknown function, has weak similarity to uncharacterized C. elegans C17H1.3	5	C31B8.4	C31B8.4	C31B8.4	622	126	496	1280	303	977	1542	365	1177	0	0.421	-1.24811
904	Protein containing a DUF138 domain of unknown function, has high similarity to uncharacterized C. elegans T06A1.5	5	C31B8.7	C31B8.7	C31B8.7	313	127	186	449	308	141	540	371	169	0	1.101	0.138814
905	Protein of unknown function, has high similarity to uncharacterized C. elegans F17A2.6	X	F17A2.12	F17A2.12	F17A2.12	184	124	60	256	308	-52	308	371	-63	0
906	Protein containing a homeobox domain (homeodomain), which are found in transcription factors, and a CUT domain, which binds DNA, has a region of low similarity to a region of one cut domain family member 2 (human ONECUT2), which is a transcription factor	5	F17A9.6	F17A9.6	F17A9.6	383	123	260	315	312	3	379	375	4	0	65	6.02237
907	Member of the glycosyl transferase family 11, which hydrolyze the glycosidic bond between two or more carbohydrates	1	F17B5.4	F17B5.4	F17B5.4	235	124	111	280	315	-35	337	379	-42	0
908	Protein of unknown function, has high similarity to uncharacterized C. elegans C11D2.5	3	F17C8.6	F17C8.6	F17C8.6	407	124	283	400	312	88	481	375	106	0	2.67	1.41684
909	Protein containing a neurotransmitter-gated ion-channel ligand binding domain, has low similarity to a region of neuronal nicotinic acetylcholine receptor alpha 6 subunit (human CHRNA6), which may be involved in neural synaptic transmission	4	F17E9.7	F17E9.7	F17E9.7	344	124	220	767	314	453	924	378	546	0	0.403	-1.31115
910	Protein containing a phox protein (PX) domain, which bind phosphoinositides, has low similarity to uncharacterized human SNX17	X	F17H10.3	F17H10.3	F17H10.3	539	126	413	567	331	236	683	398	285	0	1.449	0.535058
911	Protein of unknown function, has low similarity to uncharacterized C. elegans K04C1.3	X	F21G4.5	F21G4.5	F21G4.5	293	123	170	410	287	123	493	345	148	0	1.149	0.200379
912	Protein of unknown function, has moderate similarity to C. elegans Y77E11A_3443.O	4	F22B3.5	F22B3.5	F22B3.5	203	127	76	198	247	-49	238	297	-59	0
913	Protein with high similarity to cystathionase (human CTH), which is a pyridoxal phosphate-dependent enzyme that catalyzes the conversion of cystathionine to cysteine, member of the cysteine-methionine metabolism pyridoxal-phosphate-dependent enzyme family	5	F22B8.6	F22B8.6	F22B8.6	1396	127	1269	1410	235	1175	1698	283	1415	0	0.897	-0.15682
914	Serine/threonine protein phosphatase	1	F22D6.9	F22D6.9	F22D6.9	554	126	428	748	278	470	901	334	567	0	0.755	-0.405451
915	Member of the 7-transmembrane chemoreceptor family of G protein-coupled receptors (GPCR), has high similarity to uncharacterized C. elegans ZC239.9	2	F22E5.4	F22E5.4	F22E5.4	189	127	62	262	286	-24	315	344	-29	0
916	Member of the 7-transmembrane chemoreceptor family of G protein-coupled receptors, contains an F-box domain, which serve as a link between a target protein and ubiquitin-conjugating enzyme, has strong similarity to uncharacterized C. elegans Y27F2A.2	2	F22E5.16	F22E5.16	F22E5.16	206	126	80	292	284	8	351	342	9	0	8.889	3.15202
917	Member of the reverse transcriptase protein family, which are RNA-dependent DNA polymerases, has strong similarity to uncharacterized C. elegans B0302.3	3	F52C9.6	F52C9.6	F52C9.6	295	125	170	331	285	46	398	343	55	0	3.091	1.62807
918	Protein containing an F-box domain, which serve as a link between a target protein and a ubiquitin-conjugating enzyme, and a DUF38 domain, has a region of weak similarity to C. elegans FOG-2, which is required for the sexual identity of germ cells	X	F52D2.1	F52D2.1	F52D2.1	248	119	129	303	282	21	365	339	26	0	4.962	2.31092
919	Protein containing two collagen triple helix repeats, which are found in some extracellular proteins, and a nematode cuticle collagen N-terminal domain, has moderate similarity to C. elegans DPY-7, which it a cuticle collagen	1	F52F12.2	F52F12.2	F52F12.2	405	118	287	675	281	394	813	338	475	0	0.604	-0.72738
920	Protein containing a START (Steroidogenic Acute Regulatory protein) domain, has low similarity to a region of steroidogenic acute regulatory protein (human STAR), which acts in conversion of cholesterol into pregnenolone and lipoid adrenal hyperplasia	1	F52F12.7	F52F12.7	F52F12.7	1263	126	1137	1486	283	1203	1790	340	1450	0	0.784	-0.351074
921	Member of the sodium:solute symporter family of membrane transporters, has low similarity to sodium-dependent multivitamin transporter (rat Slc5a6), which mediates the electrogenic uptake of pantothenate, biotin, and lipoate by cells	X	F52H2.4	F52H2.4	F52H2.4	352	130	222	620	286	334	746	344	402	0	0.552	-0.85726
922	Protein of unknown function, has a region of low similarity to C. elegans PHA-1, which is involved in pharyngeal development	3	F53A2.1	F53A2.1	F53A2.1	334	128	206	385	289	96	463	348	115	0	1.791	0.840765
923	Protein of unknown function, has moderate similarity to C. elegans F16B12.6	5	F54D11.3	F54D11.3	F54D11.3	327	127	200	305	293	12	367	353	14	0	14.286	3.83653
924	Protein with strong similarity to C. elegans F54D12.1 gene product	2	F54D12.7	F54D12.7	F54D12.7	192	127	65	261	292	-31	314	351	-37	0
925	Protein with weak similarity to H. sapiens OPRK1 (opioid receptor, kappa 1)	X	F54E4.2	F54E4.2	F54E4.2	262	130	132	310	293	17	373	353	20	0	6.6	2.72247
926	Protein with weak similarity to S. cerevisiae Hut1p, which is involved in native disulfide bond formation in endoplasmic reticulum	3	F54E7.1	F54E7.1	F54E7.1	575	127	448	709	296	413	854	356	498	0	0.9	-0.152003
927	Protein of unknown function	3	F54E7.6	F54E7.6	F54E7.6	232	122	110	319	294	25	384	354	30	0	3.667	1.8746
928	Protein containing a DUF41 domain of unknown function, has weak similarity to uncharacterized C. elegans T26E4.1	3	F54G8.1	F54G8.1	F54G8.1	268	123	145	404	295	109	486	355	131	0	1.107	0.146655
929	G protein-coupled receptor, expressed in chemosensory neurons, no homolog found in human or D. melanogaster	2	srb-6/R05H5.6	R05H5.6	R05H5.6	221	124	97	346	303	43	416	365	51	0	1.902	0.927517
930	Putative dihydropyrimidinase; strongly similar to human DPYS and related genes; putative paralog of C. elegans UNC-33	1	dhp-1/(CeCRMP)/UlipB/R06C7.3	R06C7.3	R06C7.3	991	123	868	1271	304	967	1531	366	1165	0	0.745	-0.424688
931	Protein containing a DUF215 domain of unknown function, has high similarity to uncharacterized C. elegans C50C10.1	5	R07B5.4	R07B5.4	R07B5.4	234	122	112	330	306	24	397	368	29	0	3.862	1.94935
932	Protein containing a DUF215 domain of unknown function, has low similarity to uncharacterized C. elegans C38C3.2	5	R07B5.7	R07B5.7	R07B5.7	201	123	78	354	311	43	426	374	52	0	1.5	0.584963
933	Member of the phospholipase protein family	5	R07B7.8	R07B7.8	R07B7.8	489	124	365	804	312	492	968	375	593	0	0.616	-0.698998
934	Protein of unknown function, has low similarity to uncharacterized C. elegans F58E1.12	2	R07C3.10	R07C3.10	R07C3.10	244	128	116	375	312	63	451	375	76	0	1.526	0.609755
935	Protein with high similarity to solute carrier family 25 member 21 (human SLC25A21), which is a mitochondrial oxodicarboxylate carrier associated with 2-oxoadipate acidemia, member of the mitochondrial carrier protein family of membrane transporters	X	R11.1	R11.1	R11.1	830	132	698	822	325	497	990	391	599	0	1.165	0.22033
936	Member of the short-chain dehydrogenase-reductase family, which are NAD- or NADP-dependent oxidoreductases, has low similarity to 1,3,6,8-tetrahydroxynaphthalene reductase (A. fumigatus Arp2), which is involved in conidial pigment biosynthesis	5	R11D1.11	R11D1.11	R11D1.11	590	126	464	1220	337	883	1469	406	1063	0	0.437	-1.19429
937		2		multiple	R11F4.3	383	124	259	486	286	200	585	344	241	0	1.075	0.104337
938		5		R11G11.15	R11G11.15	175	124	51	209	249	-40	251	300	-49	0
939	Protein containing two C2 domains, which may be involved in calcium-dependent phospholipid binding, has low similarity to synaptotagmin 7 (rat Syt7), which regulates exocytosis and may facilitate entry of Trypanosoma cruzi into cells via lysosomes	5	R12A1.2	R12A1.2	R12A1.2	710	122	588	562	239	323	677	287	390	0	1.508	0.592636
940	Smad protein similar to vertebrate DPC4 that may act as a general cofactor for pathway-specific Smads SMA-2 and SMA-3	3	sma-4/cem-3/R12B2.1	R12B2.1	R12B2.1	1174	127	1047	1253	279	974	1509	336	1173	0	0.893	-0.163268
941	Protein with high similarity to human REA (B-cell receptor-associated protein), which is a repressor of the estrogen-bound estrogen receptor activity that interacts with prohibitin (human PHB), member of the SPFH domain or Band 7 family	2	T24H7.1	T24H7.1	T24H7.1	1623	127	1496	1403	285	1118	1690	343	1347	0	1.111	0.151859
942	Member of the UDP-glucuronosyltransferase protein family	4	T25B9.7	T25B9.7	T25B9.7	737	120	617	991	285	706	1193	343	850	0	0.726	-0.461959
943	Protein of unknown function, has high similarity to uncharacterized C. elegans MYO2-D	2	T25E4.1	T25E4.1	T25E4.1	371	117	254	329	281	48	396	338	58	0	4.379	2.1306
944	Protein containing a DUF38 domain of unknown function	5	T25E12.6	T25E12.6	T25E12.6	667	115	552	503	274	229	606	330	276	0	2	1
945	Member of the C-type lectin protein family	5	T25E12.8	T25E12.8	T25E12.8	225	117	108	340	276	64	409	332	77	0	1.403	0.488515
946	Member of the acyl-CoA dehydrogenase protein family	X	T25G12.5	T25G12.5	T25G12.5	1822	120	1702	1394	281	1113	1679	338	1341	0	1.269	0.343692
947	Member of the metallocarboxypeptidase protein family	1	W01A8.6	W01A8.6	W01A8.6	724	126	598	745	277	468	897	333	564	0	1.06	0.0840643
948	Vesicular monoamine transporter (VMAT) with similarity to mammalian VMATs	X	cat-1/W01C8.6	W01C8.6	W01C8.6	324	126	198	428	280	148	515	337	178	0	1.112	0.153157
949	Protein with moderate similarity to C. elegans C31B8.8 (Putative matrix metalloprotease)	5	W01F3.2	W01F3.2	W01F3.2	3183	127	3056	2687	289	2398	3237	348	2889	0	1.058	0.0813396
950	SR protein involved in mRNA splicing	2	rsp-2/srp-4/CeSRp40/W02B12.2	W02B12.2	W02B12.2	258	130	128	582	291	291	701	350	351	0	0.365	-1.45403
951	Protein containing a RhoGAP (GTPase activator protein) domain, has moderate similarity to rho GTPase activating protein 1 (human ARHGAP1), which is a GTPase activating protein for CDC42, rho (RHOA) and rac proteins and inhibits rho mediated responses	2	W02B12.8	W02B12.8	W02B12.8	1087	126	961	1074	293	781	1293	353	940	0	1.022	0.0313952
952	Protein containing a protein kinase domainhas low similarity to serine threonine kinase 22A (testis-specific serine kinase 1, mouse Stk22a), which is a putative testis-specific serine-threonine protein kinase that may play a role in spermatid development	2	W02B12.12	W02B12.12	W02B12.12	346	123	223	645	294	351	777	354	423	0	0.527	-0.924125
953	Protein containing an F-box domain, which serve as a link between a target protein and a ubiquitin-conjugating enzyme, and a DUF38 domain of unknown function, has a region of low similarity to C. elegans FOG-2, which is required for germ cell identity	5	F59A1.7	F59A1.7	F59A1.7	550	125	425	671	297	374	808	357	451	0	0.942	-0.086201
954	Member of the nuclear hormone receptor/Zinc finger protein family	X	nhr-3/H01A20.1	H01A20.1	H01A20.1	1359	124	1235	1264	296	968	1522	356	1166	0	1.059	0.0827026
955	Member of the reverse transcriptase protein family, which are RNA-dependent DNA polymerases, has high similarity to uncharacterized C. elegans F38E9.3	X	H02F09.4	H02F09.4	H02F09.4	202	123	79	254	303	-49	306	365	-59	0
956	Protein containing a DUF38 domain of unknown function	X	H03G16.1	H03G16.1	H03G16.1	186	119	67	273	303	-30	328	365	-37	0
957	Protein containing an F-box domain, which serve as a link between a target protein and a ubiquitin-conjugating enzyme, and a DUF38 domain of unknown function, has high similarity to uncharacterized C. elegans C18B12.5	X	H03G16.4	H03G16.4	H03G16.4	191	122	69	284	303	-19	342	365	-23	0
958	Protein of unknown function, has high similarity to uncharacterized C. elegans H12C20.5	5	H12C20.4	H12C20.4	H12C20.4	187	126	61	315	310	5	379	373	6	0	10.167	3.34582
959	Protein containing a major sperm protein (MSP) domain, which are involved in sperm motility, has moderate similarity to uncharacterized C. elegans F36H12.3	3	K08E3.2	K08E3.2	K08E3.2	252	126	126	477	313	164	574	377	197	0	0.64	-0.643856
960	Required for completion of mitosis	3	cyk-4/K08E3.6	K08E3.6	K08E3.6	632	127	505	588	318	270	708	383	325	0	1.554	0.635987
961	Member of the GDA1 or CD39 family of nucleoside phosphatases, has moderate similarity to mouse Entpd5, which is an ectonucleoside triphosphate diphosphohydrolase that hydrolyzes UDP to UMP	5	K08H10.4	K08H10.4	K08H10.4	1703	142	1561	1994	338	1656	2402	407	1995	0	0.782	-0.354759
962	Protein involved in the mechanism of RNA-mediated gene silencing; has similarity to rabbit eIF2C, Arabidopsis ZWILLE, and D. melanogaster Sting	5	rde-1/K08H10.7	K08H10.7	K08H10.7	1022	136	886	1230	352	878	1481	424	1057	0	0.838	-0.254978
963	Putative kinesin; has strong similarity to human KIF2 heavy chain kinesin; localized to kinetochores	3	K11D9.1/CelMCAK	K11D9.1	K11D9.1	988	131	857	766	293	473	922	353	569	0	1.506	0.590722
964	Putative ortholog of S. cerevisiae Apg7p, a protein involved in autophagy and the cytoplasm-to-vacuole protein targeting pathway	4	M7.5	M7.5	M7.5	1131	133	998	896	289	607	1079	348	731	0	1.365	0.448901
965	Putative ortholog of C. elegans T08B6.5 gene product	3	Y41C4A.1	Y41C4A.1	Y41C4A.1	210	128	82	226	286	-60	272	344	-72	0
966	Protein of unknown function, has moderate similarity to C. elegans C40H5.4	5	Y42A5A.2	Y42A5A.2	Y42A5A.2	412	127	285	528	290	238	636	349	287	0	0.993	-0.0101344
967	Protein containing a DUF38 domain of unknown function, has a region of low similarity to a region of C. elegans FOG-2, which is required for the sexual identity of germ cells	1	Y47H9C.10	Y47H9C.10	Y47H9C.10	444	126	318	451	283	168	543	340	203	0	1.567	0.648005
968	Member of the Tc3 Transposase protein family	m	Y47H9C.3	Y47H9C.3	Y47H9C.3	544	121	423	499	280	219	601	337	264	0	1.602	0.679874
969	Protein of unknown function, has low similarity to uncharacterized C. elegans F01F1.11	1	Y47H9C.8	Y47H9C.8	Y47H9C.8	1182	119	1063	1213	277	936	1461	333	1128	0	0.942	-0.086201
970	Protein of unknown function, has low similarity to uncharacterized C. elegans Y67D8C.2	5	Y51A2A.5	Y51A2A.5	Y51A2A.5	205	117	88	256	275	-19	308	331	-23	0
971	Protein of unknown function	2	D1069.1	D1069.1	D1069.1	402	120	282	455	281	174	548	338	210	0	1.343	0.425459
972	Member of the 7-transmembrane chemoreceptor family of G protein-coupled receptors (GPCR), has high similarity to uncharacterized C. elegans F40D4.3	5	F20E11.8	F20E11.8	F20E11.8	234	123	111	361	283	78	434	340	94	0	1.181	0.240009
973	Protein with weak similarity to H. sapiens GOLGA1 (golgi autoantigen, golgin subfamily a, 1)	5	F26D11.6	F26D11.6	F26D11.6	226	123	103	465	280	185	560	337	223	0	0.462	-1.11404
974	Member of the 7-transmembrane chemoreceptor family of G protein-coupled receptors (GPCR), has strong similarity to uncharacterized C. elegans F26D2.4	5	F26D2.5	F26D2.5	F26D2.5	187	124	63	278	281	-3	334	338	-4	0
975	Protein of unknown function, has weak similarity to C. elegans F33E2.3	1	F33E2.5	F33E2.5	F33E2.5	439	124	315	476	289	187	573	348	225	0	1.4	0.485427
976	Protein of unknown function, has strong similarity to uncharacterized C. elegans Y45F10B.2	3	F37A8.2	F37A8.2	F37A8.3	270	126	144	351	295	56	422	355	67	0	2.149	1.10367
977	Member of the flavin containing amine oxidase family, has moderate similarity to uncharacterized C. elegans T08D10.2	1	Y40B1B.6	Y40B1B.6	Y40B1B.6	695	127	568	923	294	629	1112	354	758	0	0.749	-0.416962
978	Member of the amidase family, which catalyze hydrolysis of amides, has low similarity to fatty acid amide hydrolase (rat Faah), which is a serine hydrolase that degrades neuromodulatory fatty acid amides and terminates their signaling function	3	Y41C4A.2	Y41C4A.2	Y41C4A.2	361	127	234	499	295	204	601	355	246	0	0.951	-0.0724828
979	Member of the RecA-like protein family, required for meiosis	4	rad-51/rad51/rdh-1/RDH1/DMC1-LIM15/Y43C5A.6	Y43C5A.6	Y43C5A.6	878	124	754	879	302	577	1059	363	696	0	1.083	0.115033
980	Member of the transthyretin-like family, has low similarity to a region of protein tyrosine phosphatase receptor type alpha (human PTPRA), which is a putative receptor tyrosine phosphatase that negatively regulates proliferation and inhibits tumor growth	5	Y44A6D.4	Y44A6D.4	Y44A6D.4	253	121	132	332	302	30	400	363	37	0	3.568	1.83512
981	Protein with high similarity to selenophosphate synthetase 1 (human SPS), which produces monoselenophosphate from ATP plus selenide and is important in incorporation of selenocysteine in proteins, contains AIR synthase N-terminal and C-terminal domains	4	Y45F10A.4	Y45F10A.4	Y45F10A.4	720	123	597	891	303	588	1073	365	708	0	0.843	-0.246395
982	Protein containing a DUF215 domain of unknown function, has high similarity to uncharacterized C. elegans Y45F10B.5	4	Y45F10B.6	Y45F10B.6	Y45F10B.6	208	122	86	375	305	70	451	367	84	0	1.024	0.0342157
983	Protein of unknown function	1	B0041.1	B0041.1	B0041.1	317	123	194	861	298	563	1037	359	678	0	0.286	-1.80591
984	Protein containing a BTB (BR-C, ttk and babor) or POZ (Pox virus and zinc finger) domain, which are found in some DNA and actin binding proteins and may mediate protein-protein interactions, has high similarity to uncharacterized C. elegans F47C10.2	2	B0047.2	B0047.2	B0047.2	373	127	246	646	297	349	778	357	421	0	0.584	-0.77596
985	Protein containing a meprin and TRAF homology (MATH) domain	2	B0047.4	B0047.4	B0047.4	255	127	128	435	315	120	524	379	145	0	0.883	-0.179515
986	Protein of unknown function	1	B0207.10	B0207.10	B0207.10	287	122	165	365	322	43	439	387	52	0	3.173	1.66585
987	Protein of unknown function	1	B0207.9	B0207.9	B0207.9	261	137	124	585	342	243	704	412	292	0	0.425	-1.23447
988	YGGWamide neurotransmitter	5	nlp-29/B0213.4	B0213.4	B0213.4	4253	145	4108	4359	348	4011	5251	419	4832	0	0.85	-0.234465
989	Protein containing two trypsin inhibitor-like cysteine rich domains, has high similarity to uncharacterized C. elegans C25E10.8	5	C25E10.7	C25E10.7	C25E10.7	276	129	147	334	299	35	402	360	42	0	3.5	1.80735
990		X		multiple	C25F6.6	215	132	83	252	299	-47	303	360	-57	0
991	Member of the ribosome-binding factor A family	4	C25G4.3	C25G4.3	C25G4.3	579	131	448	880	294	586	1060	354	706	0	0.635	-0.655172
992	Putative casein kinase, has similarity to human, S. cerevisiae, and D. melanogaster casein kinases	2	C25H3.1	C25H3.1	C25H3.1	555	128	427	611	294	317	736	354	382	0	1.118	0.16092
993	Protein containing two LIM domains, which may mediate protein-protein interactions, has low similarity to a region of leupaxin (human LPXN), which is a putative signal transduction protein that binds focal adhesion protein tyrosine kinase PYK2 (PTK2B)	1	C26C6.6	C26C6.6	C26C6.6	318	126	192	642	294	348	773	354	419	0	0.458	-1.12658
994	Protein of unknown function	5	C26E1.1	C26E1.1	C26E1.1	179	123	56	275	281	-6	331	338	-7	0
995	Protein of unknown function	2	C30G12.5	C30G12.5	C30G12.5	224	123	101	334	280	54	402	337	65	0	1.554	0.635987
996	Protein of unknown function	X	C30G4.5	C30G4.5	C30G4.5	209	126	83	267	283	-16	321	340	-19	0
997	Member of the thioredoxin family, has moderate similarity to C. elegans R05H5.3, which is involved in embryogenesis or morphogenesis	4	C30H6.8	C30H6.8	C30H6.8	1344	127	1217	1595	288	1307	1921	346	1575	0	0.773	-0.37146
998	Member of the 7-transmembrane chemoreceptor family of G protein-coupled receptors (GPCR), has low similarity to uncharacterized C. elegans D1065.5	5	F37B4.1	F37B4.1	C31B8.5	715	126	589	948	286	662	1142	344	798	0	0.738	-0.438307
999	Protein of unknown function, has weak similarity to C. elegans Y18D10A.R	X	C31E10.4	C31E10.4	C31E10.4	281	127	154	372	288	84	448	346	102	0	1.51	0.594549
1000	Protein of unknown function	1	C31H5.4	C31H5.4	C31H5.4	1691	130	1561	2130	287	1843	2566	345	2221	0	0.703	-0.508403
1001	Protein containing six C2H2 type zinc finger domains, which bind nucleic acids, has high similarity to a region of slug (human SNAI2), which is a transcriptional repressor that may repress basal and activator-mediated transcription	4	K02D7.2	K02D7.2	K02D7.2	333	126	207	471	289	182	567	348	219	0	0.945	-0.0816138
1002	Member of an uncharacterized protein family	5	K02E11.4	K02E11.4	K02E11.4	557	125	432	825	300	525	993	361	632	0	0.684	-0.547932
1003	Protein of unknown function	5	K02E2.4	K02E2.4	K02E2.4	532	128	404	1134	298	836	1366	359	1007	0	0.401	-1.31833
1004	Protein of unknown function	3	K02F3.10	K02F3.10	K02F3.10	1109	130	979	1420	299	1121	1710	360	1350	0	0.725	-0.463947
1005	Protein containing a K+ channel tetramerization domain, which facilitate assembly of alpha-subunits into functional tetrameric channels, has very strong similarity to uncharacterized C. elegans K02F6.5	2	K02F6.8	K02F6.8	K02F6.8	421	130	291	613	310	303	738	373	365	0	0.797	-0.327348
1006	Histone H4 in the HIS3 gene cluster	X	his-10/his-38/K03A1.6	K03A1.6	K03A1.6	3101	126	2975	2991	311	2680	3603	374	3229	0	0.921	-0.118727
1007	Protein of unknown function	1	K07A1.13	K07A1.13	K07A1.13	470	132	338	674	316	358	812	380	432	0	0.782	-0.354759
1008		1		multiple	K07A12.3	2022	132	1890	1919	296	1623	2312	356	1956	0	0.966	-0.0499049
1009	Protein of unknown function, has weak similarity to C. elegans K07C11.5	5	K07C11.3	K07C11.3	K07C11.3	1346	124	1222	2411	196	2215	2904	236	2668	0	0.458	-1.12658
1010	Protein of unknown function	5	K07C5.7	K07C5.7	K07C5.7	420	126	294	457	202	255	550	243	307	0	0.958	-0.0619024
1011	Protein of unknown function, has weak similarity to C. elegans F42H11.2	2	K07D4.2	K07D4.2	K07D4.2	292	132	160	708	308	400	853	371	482	0	0.332	-1.59074
1012	Protein of unknown function	3	K07E12.2	K07E12.2	K07E12.2	321	132	189	694	328	366	836	395	441	0	0.429	-1.22095
1013	Sperm-specific protein involved in sperm motility, member of the major sperm protein (MSP) family	4	msp-59/ZK354.11	ZK354.11	ZK354.11	474	134	340	4169	343	3826	5022	413	4609	0	0.074	-3.75633
1014	Major sperm protein required for spermatogenesis in C. elegans	4	msp-51/ZK354.5	ZK354.5	ZK354.5	645	143	502	6600	358	6242	7951	431	7520	0	0.067	-3.8997
1015		3		ZK370.9	ZK370.9	323	131	192	492	309	183	592	372	220	0	0.873	-0.195946
1016	Protein containing one LIM domain, which may mediate protein-protein interactions	4	ZK381.6	ZK381.6	ZK381.6	445	128	317	354	300	54	426	361	65	0	4.877	2.28599
1017	Member of the C-type lectin family	1	ZK39.5	ZK39.5	ZK39.5	272	128	144	343	294	49	413	354	59	0	2.441	1.28747
1018	Protein of unknown function	X	ZK470.4	ZK470.4	ZK470.4	273	127	146	381	294	87	459	354	105	0	1.39	0.475085
1019	Protein of unknown function	X	ZK813.2	ZK813.2	ZK813.2	1461	126	1335	2853	293	2560	3437	353	3084	0	0.433	-1.20756
1020	Protein of unknown function	X	ZK816.3	ZK816.3	ZK816.3	408	126	282	650	281	369	783	338	445	0	0.634	-0.657445
1021	Insulin-like protein of the type-beta subfamily	2	ins-5/ZK84.3	ZK84.3	ZK84.3	225	126	99	348	281	67	419	338	81	0	1.222	0.289244
1022	Protein with moderate similarity to C. elegans W05F2.1 gene product	2	ZK84.5	ZK84.5	ZK84.5	217	127	90	357	287	70	430	345	85	0	1.059	0.0827026
1023	Protein with low similarity to RNA polymerase III subunit C25 (S. cerevisiae Rpc25p)	5	ZK856.10	ZK856.10	ZK856.10	1269	124	1145	1364	288	1076	1643	346	1297	0	0.883	-0.179515
1024	Protein of unknown function	5	ZK856.4	ZK856.4	ZK856.4	376	123	253	386	290	96	465	349	116	0	2.181	1.12499
1025	Putative paralog of C. elegans T07D3.4	2	F28A10.9	F28A10.9	F28A10.4	431	127	304	409	288	121	492	346	146	0	2.082	1.05797
1026	Protein of unknown function	1	F28B3.2	F28B3.2	F28B3.2	252	131	121	309	289	20	372	348	24	0	5.042	2.334
1027	Protein of unknown function	3	F28F5.4	F28F5.4	F28F5.4	407	128	279	582	294	288	701	354	347	0	0.804	-0.314733
1028	Protein of unknown function	1	F28H1.1	F28H1.1	F28H1.1	423	126	297	461	301	160	555	362	193	0	1.539	0.621993
1029	Protein of unknown function	1	F28H1.5	F28H1.5	F28H1.5	262	128	134	348	299	49	419	360	59	0	2.271	1.18333
1030	Protein with strong similarity to C. elegans F26F2.6 gene product	2	F29A7.3	F29A7.3	F29A7.3	473	127	346	643	299	344	774	360	414	0	0.836	-0.258425
1031	Protein of unknown function	1	F33H2.6	F33H2.6	F33H2.6	769	126	643	1018	305	713	1226	367	859	0	0.749	-0.416962
1032	Homeodomain transcription factor, has weak similarity to C. elegans LIM-7	2	F34D6.2	F34D6.2	F34D6.2	229	130	99	547	318	229	659	383	276	0	0.359	-1.47794
1033	Protein of unknown function	X	F34H10.2	F34H10.2	F34H10.2	290	133	157	343	328	15	413	395	18	0	8.722	3.12466
1034	Protein of unknown function	5	F35B12.3	F35B12.3	F35B12.3	1377	137	1240	1500	310	1190	1807	373	1434	0	0.865	-0.209228
1035	Protein of unknown function	5	F35B12.8	F35B12.8	F35B12.8	584	130	454	537	181	356	646	218	428	0	1.061	0.0854247
1036	Protein of unknown function	2	F35C11.6	F35C11.6	F35C11.6	565	127	438	668	202	466	804	243	561	0	0.781	-0.356606
1037		5		T27E4.8	T27E4.8	934	132	802	2401	267	2134	2892	321	2571	0	0.312	-1.68038
1038	Protein of unknown function	5	T27F2.4	T27F2.4	T27F2.4	723	134	589	871	307	564	1049	369	680	0	0.866	-0.207561
1039	Protein containing a DUF19 domain of unknown function, which contain twelve conserved cysteines, has high similarity to uncharacterized C. elegans C17B7.4	5	T28A11.16	T28A11.16	T28A11.16	272	137	135	431	339	92	519	408	111	0	1.216	0.282143
1040	Protein containing a DUF19 domain of unknown function, which contain twelve conserved cysteines, has strong similarity to uncharacterized C. elegans C17B7.3	5	T28A11.3	T28A11.3	T28A11.3	492	138	354	944	361	583	1137	434	703	0	0.504	-0.988504
1041	Protein containing a DUF19 domain of unknown function, which contain twelve conserved cysteines, has strong similarity to uncharacterized C. elegans C17B7.4	5	T28A11.5	T28A11.5	T28A11.5	391	135	256	460	306	154	554	368	186	0	1.376	0.46048
1042	Member of the transthyretin-like family, has high similarity to uncharacterized C. elegans C40H1.5	X	T28B4.3	T28B4.3	T28B4.3	1219	140	1079	974	306	668	1173	368	805	0	1.34	0.422233
1043	Protein of unknown function, has low similarity to uncharacterized C. elegans R07C12.3	4	W03D2.6	W03D2.6	W03D2.6	858	131	727	1693	299	1394	2039	360	1679	0	0.433	-1.20756
1044	Protein of unknown function, has weak similarity to C. elegans C52A10.3	4	W03D2.8	W03D2.8	W03D2.8	406	131	275	329	294	35	396	354	42	0	6.548	2.71105
1045	Protein of unknown function, has low similarity to uncharacterized human LOC51002	4	W03F8.4	W03F8.4	W03F8.4	1212	135	1077	1177	290	887	1418	349	1069	0	1.007	0.0100637
1046	Protein with strong similarity to C. elegans Y32G9A.3 gene product	5	W03F9.3	W03F9.3	W03F9.3	362	127	235	492	282	210	592	339	253	0	0.929	-0.106249
1047	Member of the Skp1 family, has a region of high similarity to transcription elongation factor B (SIII) polypeptide 1 (human TCEB1), which is a 15 kD regulatory subunit of the elongin complex that suppresses transient pausing of RNA polymerase II	X	W03H1.2	W03H1.2	W03H1.2	271	123	148	268	285	-17	322	343	-21	0
1048	Calpain family cysteine protease	1	W04A4.4	W04A4.4	W04A4.4	199	121	78	251	288	-37	302	346	-44	0
1049	Protein of unknown function, has high similarity to uncharacterized C. elegans K07C11.7	5	C25E10.12	C25E10.12	6C25E10.12	775	123	652	811	289	522	977	348	629	0	1.037	0.0524159
1050	Putative ortholog of C. elegans Y116F11.Z gene product	5	C25F9.1	C25F9.1	C25F9.1	272	123	149	1344	294	1050	1619	354	1265	0	0.118	-3.08314
1051	Protein of unknown function	5	C26F1.3/5I259	C26F1.3	0C26F1.3	862	127	735	1348	296	1052	1624	356	1268	0	0.58	-0.785875
1052	Protein of unknown function, has high similarity to uncharacterized C. elegans H11L12.1	1	C27C7.1	C27C7.1	2C27C7.1	1009	129	880	728	301	427	877	362	515	0	1.709	0.773152
1053	Protein of unknown function	4	C27H2.2	C27H2.2	C27H2.2	279	138	141	413	299	114	497	360	137	0	1.029	0.041243
1054	Protein of unknown function	4	C28C12.1	C28C12.1	C28C12.1	241	133	108	517	298	219	622	359	263	0	0.411	-1.28279
1055	Protein of unknown function, has weak similarity to C. elegans F56H1.2	1	C35E7.7	C35E7.7	C35E7.7	200	135	65	299	299		360	360		0
1056	Protein of unknown function	X	C36B7.3	C36B7.3	C36B7.3	228	131	97	297	299	-2	357	360	-3	0
1057	Protein containing a DUF19 domain of unknown function, which contain twelve conserved cysteines, has high similarity to uncharacterized C. elegans T28A11.3	5	C36C5.12	C36C5.12	C36C5.12	806	125	681	660	306	354	795	368	427	0	1.595	0.673556
1058	Protein containing a DUF19 domain of unknown function, which contain twelve conserved cysteines, has high similarity to uncharacterized C. elegans C36C5.14	5	C36C5.15	C36C5.15	C36C5.15	367	127	240	728	314	414	877	378	499	0	0.481	-1.05589
1059	Protein containing a DUF19 domain of unknown function, which contain twelve conserved cysteines, has high similarity to uncharacterized C. elegans F10G2.1	5	C36C5.5	C36C5.5	C36C5.5	376	130	246	387	329	58	466	396	70	0	3.514	1.81311
1060	Protein containing two ankyrin repeats, which may mediate protein-protein interactions	1	C36F7.2	C36F7.2	C36F7.2	446	133	313	585	327	258	704	393	311	0	1.006	0.00863031
1061	Member of the cytochrome c oxidase subunit VIa family, which are small polypeptidic subunits of cytochrome c	3	F54D8.2	F54D8.2	F54D8.2	2460	136	2324	2245	313	1932	2704	377	2327	0	0.999	-0.00144342
1062	Protein of unknown function, has low similarity to uncharacterized human FLJ20457	3	F54F2.7	F54F2.7	F54F2.7	1624	140	1484	2594	309	2285	3125	372	2753	0	0.539	-0.891643
1063		1		multiple	F55D12.6	399	135	264	544	287	257	655	345	310	0	0.852	-0.231075
1064		4		AF304122-1.F55G1	F55G1.2	2949	132	2817	2980	276	2704	3590	332	3258	0	0.865	-0.209228
1065	Protein of unknown function	X	F56C3.5	F56C3.5	F56C3.5	205	134	71	281	338	-57	338	407	-69	0
1066	Protein of unknown function	3	F56C9.9	F56C9.9	F56C9.9	382	138	244	604	355	249	727	427	300	0	0.813	-0.298673
1067	Protein of unknown function, has weak similarity to C. elegans T20F7.2	3	K02D10.4	K02D10.4	K02D10.4	452	138	314	558	299	259	672	360	312	0	1.006	0.00863031
1068		5		multiple	K02E2.3	231	137	94	279	296	-17	336	356	-20	0
1069	Protein of unknown function, has strong similarity to C. elegans M01D1.2	2	K02E7.5	K02E7.5	K02E7.5	422	136	286	422	296	126	508	356	152	0	1.882	0.912267
1070	Protein of unknown function	3	K02F3.9	K02F3.9	K02F3.9	1822	142	1680	1817	293	1524	2189	353	1836	0	0.915	-0.128156
1071	Protein with high similarity to cysteine string protein (rat Csp), which is a highly fatty acylated chaperone protein that stimulates rat Hsc70 ATPase activity and is involved in exocytosis regulation, contains a DnaJ domain, which act in protein folding	X	K02G10.8	K02G10.8	K02G10.8	1245	142	1103	1105	286	819	1331	344	987	0	1.118	0.16092
1072	Protein of unknown function	X	K03A11.5	K03A11.5	K03A11.5	699	130	569	953	281	672	1148	338	810	0	0.702	-0.510457
1073	Protein of unknown function	2	W04H10.2	W04H10.2	W04H10.2	380	126	254	458	281	177	551	338	213	0	1.192	0.253384
1074	Putative ortholog of C. elegans ZK678.3 gene product	3	W05G11.2	W05G11.2	W05G11.2	524	126	398	755	286	469	909	344	565	0	0.704	-0.506353
1075	Protein with strong similarity to C. elegans Y57A10C.10 gene product	2	W05H5.1	W05H5.1	W05H5.1	200	128	72	265	285	-20	319	343	-24	0
1076	Protein of unknown function	2	W06A11.1	W06A11.1	W06A11.1	352	128	224	364	290	74	438	349	89	0	2.517	1.33171
1077	Predicted pseudogene, has strong similarity to C. elegans grd-1 gene product	X	W06B11.4	W06B11.4	W06B11.4	134	125	9	309	298	11	372	359	13	0	0.692	-0.531156
1078	Protein of unknown function, has moderate similarity to C. elegans F02H6.4	X	W06D11.5	W06D11.5	W06D11.5	348	131	217	371	299	72	446	360	86	0	2.523	1.33514
1079	Serine/threonine protein kinase of the casein kinase I subfamily, has similarity to S. cerevisiae Yck1p and Yck2p casein kinase I isoforms	1	Y106G6E.6	Y106G6E.6	Y106G6E.6	995	141	854	914	294	620	1101	354	747	0	1.143	0.192825
1080					2Y106G6H.6	934	140	794	745	295	450	897	355	542	0	1.465	0.550901
1081	Protein containing a DUF 227 domain of unknown function	4	Y11D7A.8	Y11D7A.8	Y11D7A.8	285	132	153	345	296	49	415	356	59	0	2.593	1.37462
1082		2		W03C9.4	Y17G7A.2	370	132	238	432	300	132	520	361	159	0	1.497	0.582074
1083	Protein of unknown function, has low similarity to uncharacterized C. elegans W01C9.5	2	Y17G7B.6	Y17G7B.6	5Y17G7B.6	353	135	218	468	310	158	563	373	190	0	1.147	0.197865
1084	Protein with high similarity to synaptosomal-associated protein 25 kDa (rat Snap25), which is a t-SNARE that plays a role in membrane fusion duringexocytosis and neurotransmitter release, member of the synaptosome-associated protein 25 kD(SNAP-25)family	5	Y22F5A.3	Y22F5A.3	Y22F5A.3	1385	144	1241	1489	329	1160	1793	396	1397	0	0.888	-0.171368
1085	Putative nuclear thioredoxin	2	R05H5.3	R05H5.3	R05H5.3	2377	147	2230	2324	334	1990	2800	402	2398	0	0.93	-0.104697
1086	Member of the thiol antioxidant (thioredoxin peroxidase) protein family	3	R07E5.2	R07E5.2	R07E5.2	1767	148	1619	1577	334	1243	1900	402	1498	0	1.081	0.112367
1087	Protein with high similarity to histone H2A variant (S. pombe Pht1p), member of the histone family of nucleosomal core proteins	4	R08C7.3	R08C7.3	R08C7.3	3359	147	3212	3170	334	2836	3819	402	3417	0	0.94	-0.0892673
1088	Member of the glycosyl hydrolase 18 family, has weak similarity to chitinase 3-like protein 1 (cartilage glycoprotein-39, human CHI3L1), which binds chitin and is expressed in rheumatoid arthritis cartilage and synovial cells	2	R09D1.9	R09D1.9	R09D1.9	504	141	363	886	337	549	1067	406	661	0	0.549	-0.865122
1089	Protein of unknown function, has moderate similarity to uncharacterized human MDS031	5	R10D12.12	R10D12.12	R10D12.12	1348	134	1214	1654	333	1321	1992	401	1591	0	0.763	-0.390245
1090		3		AB000917-1.R10E11	R10E11.8	2002	129	1873	1773	334	1439	2136	402	1734	0	1.08	0.111031
1091	Protein containing an RNA recognition motif (RRM, RBD, or RNP)	3	T12D8.2	T12D8.2	T12D8.2	1709	128	1581	1829	347	1482	2203	418	1785	0	0.886	-0.174621
1092	Sperm-specific protein involved in sperm motility, member of the major sperm protein (MSP) family	4	T13F2.10	T13F2.10	T13F2.10	431	135	296	1698	363	1335	2045	437	1608	0	0.184	-2.44222
1093	Protein of unknown function	3	T16H12.2	T16H12.2	T16H12.2	276	139	137	464	295	169	559	355	204	0	0.672	-0.573467
1094	Protein with strong similarity to C. elegans F26A1.12 gene product	4	T20D3.1	T20D3.1	T20D3.1	275	135	140	522	293	229	628	353	275	0	0.509	-0.974262
1095	Protein containing a PHD-finger, which may be involved in chromatin-mediated transcriptional regulation	5	T23B12.1	T23B12.1	T23B12.1	1409	136	1273	1755	290	1465	2114	349	1765	0	0.721	-0.471929
1096	Protein of unknown function, has weak similarity to C. elegans K09G1.2	1	T23G11.1	T23G11.1	T23G11.1	370	137	233	715	281	434	861	338	523	0	0.446	-1.16488
1097	Protein of unknown function	5	F13A2.1	F13A2.1	F13A2.1	213	132	81	306	278	28	368	334	34	0	2.382	1.25217
1098		n		no_pcr	F13A2.8	231	132	99	315	279	36	379	336	43	0	2.302	1.20289
1099	Member of the phosphatidic acid phosphatase-related (PAP2) phosphoesterase family, has low similarity to phosphatidic acid phosphatase type 2a (rat Ppap2a), which catalyzes the dephosphorylation of various lipid phosphates	X	F13E6.5	F13E6.5	F13E6.5	662	131	531	794	281	513	956	338	618	0	0.859	-0.21927
1100	Protein of unknown function	X	F14H12.6	F14H12.6	F14H12.6	254	126	128	359	284	75	432	342	90	0	1.422	0.507921
1101	Protein of unknown function	X	F15G9.3	F15G9.3	F15G9.3	237	125	112	357	282	75	430	339	91	0	1.231	0.299831
1102	Protein containing two DUF40 domains of unknown function, which contain four conserved cysteines, has low similarity to uncharacterized C. elegans C45H4.16	5	F16B4.10	F16B4.10	F16B4.10	199	128	71	277	284	-7	333	342	-9	0
1103	Protein containing two PDZ, DHR, or GLGF domains, which are found in signaling proteins, has low similarity to syntrophin gamma 2 (human SNTG2), which may play a role in signal transduction in neurons and is associated with Duchenne muscular dystrophy	X	F27D9.8	F27D9.8	F27D9.8	481	128	353	547	296	251	659	356	303	0	1.165	0.22033
1104	Protein containing a protein kinase domain, has low similarity to serum-glucocorticoid regulated kinase 2 (human SGK2), which is a serine-threonine kinase that may be regulated by 3-phosphoinositide-dependent kinase-1 (human PDK1) and by hydrogen peroxide	X	F28C10.3	F28C10.3	F28C10.3	473	131	342	651	294	357	784	354	430	0	0.795	-0.330973
1105	Protein of unknown function	2	F29A7.4	F29A7.4	F29A7.4	286	135	151	606	296	310	730	356	374	0	0.404	-1.30757
1106	Member of the rhodopsin family of G protein-coupled receptors (GPCR), has low similarity to tachykinin receptor 1 (substance P receptor, rat Tacr1), which is involved in pain transmission, inflammation, perception of noxious stimuli, and behavior	X	F31B9.1	F31B9.1	F31B9.1	308	135	173	489	301	188	589	362	227	0	0.762	-0.392137
1107	Protein of unknown function, has strong similarity to C. elegans W02D9.10	5	F31D4.8	F31D4.8	F31D4.8	386	130	256	654	299	355	787	360	427	0	0.6	-0.736966
1108	Protein of unknown function	5	F31F7.3	F31F7.3	F31F7.3	283	131	152	496	296	200	597	356	241	0	0.631	-0.664288
1109	Inhibitor of programmed cell death; protein with similarity to human Bcl-2	3	ced-9/T07C4.8	T07C4.8	T07C4.8	571	136	435	703	314	389	846	378	468	0	0.929	-0.106249
1110	Protein of unknown function	X	T07D1.5	T07D1.5	T07D1.5	270	143	127	357	329	28	430	396	34	0	3.735	1.90111
1111	Protein with moderate similarity to C. elegans T07D3.9	2	T07D3.3	T07D3.3	T07D3.3	408	144	264	736	332	404	886	400	486	0	0.543	-0.880976
1112	Member of the phosphoglycerate mutase family	X	T07F12.1	T07F12.1	T07F12.1	244	139	105	416	328	88	501	395	106	0	0.991	-0.013043
1113	Has moderate similarity to human synaptogyrins	X	sng-1/T08A9.3	T08A9.3	T08A9.3	643	136	507	575	326	249	692	392	300	0	1.69	0.757023
1114	Member of the 7-transmembrane chemoreceptor family of G-protein coupled receptors (GPCR), has high similarity to uncharacterized C. elegans T01G5.5	4	T08B6.7	T08B6.7	T08B6.7	251	132	119	368	326	42	443	392	51	0	2.333	1.22219
1115	Protein of unknown function	5	T21H3.5	T21H3.5	T21H3.5	570	133	437	625	327	298	753	393	360	0	1.214	0.279768
1116	Member of the galactosyltransferase family, which transfer galactose to GlcNAc termini of growing oligosaccharide chains, has moderate similarity to uncharacterized C. elegans C02H6.1	4	T22B11.2	T22B11.2	T22B11.2	322	129	193	606	331	275	730	398	332	0	0.581	-0.78339
1117	Protein containing three C2H2 type zinc finger domains, which bind nucleic acids, has high similarity to a region of trans-acting transcription factor 1 (mouse Sp1), which is a transcriptional activator involved in stress response	2	T22C8.5	T22C8.5	T22C8.5	263	125	138	537	346	191	646	416	230	0	0.6	-0.736966
1118	Member of the sugar (and other) transporter family, has weak similarity to solute carrier family 22 member 2 (rat Slc22a2), which may play a role in the transport of cationic drugs in the kidney	3	T22F7.1	T22F7.1	T22F7.1	608	131	477	768	361	407	925	434	491	0	0.971	-0.0424568
1119	Putative ortholog of C. elegans R13H9.1 gene product	1	T23B3.3	T23B3.3	T23B3.3	305	134	171	475	290	185	572	349	223	0	0.767	-0.382702
1120	MGL/Famide neurotransmitter	X	T23E7.4	T23E7.4	T23E7.4	1432	135	1297	288	287	1	346	345	1	0	1297	10.341
1121	Protein of unknown function	5	ZC404.1	ZC404.1	ZC404.1	368	132	236	335	285	50	403	343	60	0	3.933	1.97563
1122	Protein of unknown function, has weak similarity to C. elegans C55C3.1	5	ZC513.2	ZC513.2	ZC513.2	326	143	183	382	286	96	460	344	116	0	1.578	0.658097
1123	Protein with strong similarity to C. elegans SQT-3, which is a collagen that is involved in cuticle synthesis and morphogenesis of the epithelium, contains two collagen triple helix repeats and one nematode cuticle collagen N-terminal domain	5	col-43/ZC513.8	ZC513.8	ZC513.8	5194	140	5054	2989	285	2704	3601	343	3258	0	1.551	0.633199
1124		5		ZK682.3	ZK682.3	235	130	105	351	280	71	422	337	85	0	1.235	0.304511
1125	Protein containing a nuclear hormone receptor ligand-binding domain and a nuclear hormone receptor C4-type zinc finger domain, which bind DNA and may be involved in regulation of transcription, has weak similarity to C. elegans NHR-80	5	ZK697.2	ZK697.2	ZK697.2	358	134	224	439	284	155	528	342	186	0	1.204	0.267835
1126	Member of the lipocalin and cytosolic fatty-acid binding protein family, has high similarity to uncharacterized C. elegans LBP-3	5	lbp-4/ZK742.5	ZK742.5	ZK742.5	656	135	521	770	291	479	927	350	577	0	0.903	-0.147202
1127	Protein with high similarity to heat shock 70kD protein 8 (human HSPA8), which is elevated in the hearts of patients with hypertrophic cardiomyopathy, member of the Hsp70 family, which are stress-induced protein chaperones	1	C12C8.1	C12C8.1	C12C8.1#2	1261	126	1135	1073	282	791	1292	339	953	0	1.191	0.252173
1128	Protein with strong similarity to C. elegans K10G4.5 gene product	5	C18D4.1	C18D4.1	C18D4.1#2	436	124	312	722	281	441	869	338	531	0	0.588	-0.766112
1129	TcA transposase	m	C31A11.8	C31A11.8	C31A11.8#2	584	133	451	698	295	403	840	355	485	0	0.93	-0.104697
1130	Protein of unknown function, has low similarity to uncharacterized Era-like 1 (mouse Eral1), which is a putative GTPase with possible roles in cell cycle control	2	E02H1.2	E02H1.2	E02H1.2#2	678	135	543	808	299	509	973	360	613	0	0.886	-0.174621
1131	Protein with high similarity to ubiquitin-activating enzyme E1C (human UBE1C), which is a subunit of an E1-like complex, member of the UBA-THIF-type NAD-FAD binding fold family, contains a repeat in ubiquitin-activating (UBA) protein domain	3	uba-3/F11H8.1	F11H8.1	F11H8.1#2	1077	140	937	1081	307	774	1302	369	933	0	1.004	0.00575927
1132	Member of the ribosomal L3 protein family	3	rpl-3/F13B10.2	F13B10.2	F13B10.2#2	9891	146	9745	8706	311	8395	10489	374	10115	0	0.963	-0.0543923
1133		5		C13B7.1	C13B7.1	345	136	209	339	304	35	408	366	42	0	4.976	2.31499
1134	Member of the 7-transmembrane chemoreceptor family of G-protein coupled receptors (GPCR), has low similarity to C. elegans ODR-10, which is a G protein-coupled receptor involved in odorant response	5	C13B7.5/C13B7.A	C13B7.5	C13B7.5	275	132	143	351	301	50	422	362	60	0	2.383	1.25278
1135		1		no_gene	C24A11.7	225	134	91	365	309	56	439	372	67	0	1.358	0.441483
1136	Protein with similarity to human putative DNA binding protein SON3, has similarity to two C. elegans putative semaphorins	1	D1037.2/Ce-Sema-1b	D1037.2	D1037.2	446	131	315	492	313	179	592	377	215	0	1.465	0.550901
1137	Protein containing a DUF33 domain of unknown function, has high similarity to uncharacterized C. elegans K09E10.2	5	D2063.2/D2063.B	D2063.2	D2063.2	205	125	80	247	314	-67	297	378	-81	0
1138	Protein of unknown function, putative paralog of C. elegans C04F2.1 and W03F9.6	5	DC2.2	DC2.2	DC2.2	236	130	106	348	317	31	419	381	38	0	2.789	1.47975
1139	Protein of unknown function, has low similarity to uncharacterized C. elegans F25G6.1	?	AC8.3/AC8.F	AC8.3	AC8.3	576	126	450	709	321	388	854	386	468	0	0.962	-0.0558912
1140	Protein of unknown function, has strong similarity to C. elegans AC8.J	?	AC8.6	AC8.6	AC8.6	514	121	393	617	319	298	743	384	359	0	1.095	0.130931
1141		5		multiple	C18B10.5	213	126	87	325	318	7	391	383	8	0	10.875	3.44294
1142	Protein with moderate similarity to C. elegans F11G11.9 gene product	2	C33F10.10	C33F10.10	C33F10.10	209	128	81	335	328	7	403	395	8	0	10.125	3.33985
1143	Protein of unknown function	2	E04F6.12	E04F6.12	E04F6.12	394	124	270	839	337	502	1010	406	604	0	0.447	-1.16165
1144	Protein containing two SNF2 related N-terminal domains and a helicase conserved C-terminal domain, has low similarity to TBP-associated factor 172 (human BTAF1), which is involved in regulation RNA polymerase II and RNA polymerase III transcription	2	F15D4.1	F15D4.1	F15D4.1	556	138	418	512	355	157	616	427	189	0	2.212	1.14535
1145	Protein with high similarity to cytochrome c oxidase assembly protein 17 (human COX17), which is a putative copper binding protein that may function to transport copper to the mitochondria for assembly into the cytochrome oxidase complex	3	F40G9.2	F40G9.2	F40G9.2	799	136	663	995	291	704	1198	350	848	0	0.782	-0.354759
1146	Protein of unknown function	2	F41C3.7	F41C3.7	F41C3.7	910	138	772	853	282	571	1027	339	688	0	1.122	0.166073
1147	Protein of unknown function	4	F42A9.3	F42A9.3	F42A9.3	444	136	308	675	280	395	813	337	476	0	0.647	-0.628162
1148	Protein of unknown function, has weak similarity to C. elegans ZK1055.1	5	F44E7.3	F44E7.3	F44E7.3	1066	147	919	944	284	660	1137	342	795	0	1.156	0.209141
1149		n		no_gene	F45E6.5	1167	146	1021	914	281	633	1101	338	763	0	1.338	0.420078
1150	Protein of unknown function	X	F46C8.1	F46C8.1	F46C8.1	482	150	332	509	291	218	613	350	263	0	1.262	0.335712
1151	Protein with high similarity to ribosomal protein L13A (mouse Rpl13a), which is a putative component of the large 60S ribosomal subunit that may act as a tissue-specific transplantation antigen, member of the ribosomal L13 family	3	M01F1.2	M01F1.2	M01F1.2	11459	153	11306	12752	299	12453	15363	360	15003	0	0.754	-0.407364
1152		5		R03H4.8	R03H4.8	256	141	115	345	289	56	415	348	67	0	1.716	0.77905
1153	Protein of unknown function, has high similarity to uncharacterized putative nucleic acid binding protein RY1 (human RY1)	1	R05D11.7	R05D11.7	R05D11.7	1648	129	1519	1695	285	1410	2042	343	1699	0	0.894	-0.161653
1154	Protein of unknown function	4	R05G6.3	R05G6.3	R05G6.3	201	120	81	278	282	-4	334	339	-5	0
1155	Member of the 7-transmembrane chemoreceptor family of G-protein coupled receptors (GPCR), has moderate similarity to uncharacterized C. elegans R08H2.11	5	R08H2.6	R08H2.6	R08H2.6	202	133	69	249	298	-49	300	359	-59	0
1156	Protein containing an RNA recognition motif (RRM, RBD, or RNP), has high similarity to a region of cleavage stimulation factor subunit 2 tau (mouse Cstf2t), which is a variant of mouse Cstf2 and is part of a complex involved in mRNA processing	1	R09B3.2	R09B3.2	R09B3.2	3083	143	2940	2340	304	2036	2819	366	2453	0	1.199	0.261832
1157	Part of the class B pathway that antagonizes vulval induction	3	lin-37/ZK418.4	ZK418.4	ZK418.4	794	149	645	829	306	523	998	368	630	0	1.024	0.0342157
1158		2		multiple	ZK430.6	1156	145	1011	859	302	557	1034	363	671	0	1.507	0.591679
1159	Protein containing glutathione S-transferase N- and C-terminal domains, has moderate similarity to prostaglandin D2 synthase (human PGDS), which is a prostaglandin D synthase and glutathione S-transferase that regulates non-rapid eye movement sleep	2	ZK546.11	ZK546.11	ZK546.11	267	128	139	392	299	93	472	360	112	0	1.241	0.311503
1160	Protein of unknown function, has strong similarity to uncharacterized C. elegans ZK1320.2	2	ZK1320.3	ZK1320.3	ZK1320.3	2038	131	1907	2526	305	2221	3043	367	2676	0	0.713	-0.488026
1161	Protein of unknown function, has very strong similarity to uncharacterized C. elegans C17C3.13	2	C17C3.2	C17C3.2	C17C3.2	407	139	268	775	311	464	933	374	559	0	0.479	-1.0619
1162	Protein of unknown function	2	C18E9.5	C18E9.5	C18E9.5	590	133	457	753	315	438	907	379	528	0	0.866	-0.207561
1163	Protein containing a RhoGAP (GTPase activator protein) domain, has a region of low similarity to a region of rho GTPase activating protein 6 (mouse Arhgap6), which is a multiple splice form GTPase activating protein (GAP) for mouse Arha2	1	C01F4.2	C01F4.2	C01F4.2	535	129	406	916	312	604	1103	375	728	0	0.558	-0.841663
1164	Protein with high similarity to solute carrier family 35 (UDP-N-acetylglucosamine(UDP-GlcNAc) transporter) member 3 (human SLC35A3), which transports nucleotide sugars	2	C03H5.2	C03H5.2	C03H5.2	421	130	291	780	316	464	939	380	559	0	0.521	-0.940645
1165	Member of the domain of unknown function DUF13 family, has high similarity to uncharacterized C. elegans C03G6.6	1	C04F1.1	C04F1.1	C04F1.1	307	130	177	627	318	309	755	383	372	0	0.476	-1.07097
1166	Protein containing a C-type lectin domain, which mediate calcium-dependent carbohydrate recognition, has moderate similarity to uncharacterized C. elegans EEED8.11	2	C04H5.2	C04H5.2	C04H5.2	595	124	471	1210	319	891	1457	384	1073	0	0.439	-1.18771
1167	Protein of unknown function	2	C06A1.2	C06A1.2	C06A1.2	269	128	141	556	324	232	669	390	279	0	0.505	-0.985645
1168	Protein containing two RNA recognition motifs (RRM, RBD, or RNP), has moderate similarity to TIA1 cytotoxic granule associated RNA-binding protein-like 1 (human TIAL1), which is a transcriptional repressor that binds platelet factor (human PF4) promoter	X	C07A4.1	C07A4.1	C07A4.1	404	127	277	553	333	220	666	401	265	0	1.045	0.0635029
1169	Member of the ubiE or COQ5 methyltransferase family, has low similarity to S-adenosyl-L-methionine delta-24-sterol-C-methyltransferase (C. albicans Erg6p), which carries out methylation of zymosterol as part of the ergosterol biosynthesis pathway	3	H14E04.1/H14E04.F	H14E04.1	H14E04.1	394	127	267	692	341	351	833	410	423	0	0.631	-0.664288
1170	Protein of unknown function, has weak similarity to C. elegans K01G12.3	4	K01G12.2	K01G12.2	K01G12.2	1232	132	1100	1214	354	860	1462	426	1036	0	1.062	0.0867838
1171	Putative transcription factor of the forkhead family	X	K03C7.2	K03C7.2	K03C7.2	1020	137	883	1206	293	913	1453	353	1100	0	0.803	-0.316528
1172	Protein of unknown function	X	K06G5.3	K06G5.3	K06G5.3	329	139	190	514	284	230	619	342	277	0	0.686	-0.54372
1173	Protein with strong similarity to C. elegans C47E12.6 gene product	4	K09B11.10	K09B11.10	K09B11.10	407	138	269	639	280	359	769	337	432	0	0.623	-0.682696
1174	Member of an uncharacterized protein family	4	K10D11.2	K10D11.2	K10D11.2	359	129	230	557	276	281	671	332	339	0	0.678	-0.560643
1175	Protein containing a diacylglycerol kinase (DAGK) accessory domain, which are involved in the conversion of diacylglycerol, and a diacylglycerol kinase catalytic domain (presumed), has moderate similarity to diacylglycerol kinase zeta (rat Dgkz)	2	K06A1.6	K06A1.6	T28D9.5	400	130	270	661	276	385	796	332	464	0	0.582	-0.780909
1176	Protein containing an ERCC4 domain, which may modify DNA, has low similarity to excision repair cross complementing 4 (human ERCC4), which is an endonuclease participating in nucleotide excision repair that is associated with xeroderma pigmentosum group F	2	C47D12.8	C47D12.8	VF13D12L.2	424	148	276	653	287	366	786	345	441	0	0.626	-0.675765
1177	Protein of unknown function, has low similarity to a region of S. cerevisiae Ccr4p, which is a component of the CCR4 transcriptional complex and a component of the major cytoplasmic mRNA deadenylase	5	W02G9.5	W02G9.5	W02G9.5	462	150	312	743	287	456	895	345	550	0	0.567	-0.818579
1178	Protein of unknown function	1	W04A4.2	W04A4.2	W04A4.2	730	137	593	834	278	556	1004	334	670	0	0.885	-0.176251
1179	Protein of unknown function	1	W05B5.1	W05B5.1	W05B5.1	403	135	268	674	284	390	812	342	470	0	0.57	-0.810966
1180		5		W07B8.2	W07B8.2	481	124	357	802	286	516	966	344	622	0	0.574	-0.800877
1181	Protein containing a homeobox domain (homeodomain), which are found in transcription factors, has a region of high similarity to a region of drosophila NK2 transcription factor related locus 3 (mouse Nkx2-3), which is a transcription factor	5	F46F3.1	F46F3.1	F46F3.1	537	128	409	768	296	472	925	356	569	0	0.719	-0.475936
1182	Protein of unknown function, has low similarity to uncharacterized C. elegans F47C12.7	4	F47C12.8	F47C12.8	F47C12.8	194	135	59	308	294	14	371	354	17	0	3.471	1.79535
1183	Protein of unknown function, has weak similarity to C. elegans EGAP4.1	X	F47E1.1	F47E1.1	F47E1.1	537	129	408	795	288	507	957	346	611	0	0.668	-0.58208
1184	Protein of unknown function	2	F47F6.4	F47F6.4	F47F6.4	190	126	64	299	291	8	360	350	10	0	6.4	2.67807
1185	Member of the p24 family of type I membrane proteins, involved in negative regulation of LIN-12 and GLP-1 activity	5	F47G9.1	F47G9.1	F47G9.1	1640	128	1512	1780	297	1483	2144	357	1787	0	0.846	-0.24127
1186	Member of the SCP-like extracellular protein family, has a region of low similarity to testis specific protein 1 (rat Tpx1), which functions as a cell adhesion molecule that mediates interactions between spermatogenic and Sertoli cells	3	F48E8.1	F48E8.1	F48E8.1	795	126	669	967	302	665	1165	363	802	0	0.834	-0.261881
1187	Protein of unknown function, has strong similarity to C. elegans F58B6.4	3	Y71D11A.3	Y71D11A.3	F58B6.4	409	126	283	576	309	267	693	372	321	0	0.882	-0.181149
1188	Homeodomain transcription factor; similar over the homeodomain to many human and D. melanogaster homeodomain transcription factors; involved in recognition of pioneering axons by subsequent axons within the left bundle of the ventral nerve cord	5	unc-42/F58E6.10	F58E6.10	F58E6.10	302	129	173	442	308	134	532	371	161	0	1.075	0.104337
1189	Putative ortholog of C. elegans W09C2.4 gene product	4	F58G6.6	F58G6.6	F58G6.6	250	122	128	513	310	203	618	373	245	0	0.522	-0.937878
1190		5		F59E11.3	F59E11.3	567	126	441	942	316	626	1134	380	754	0	0.585	-0.773491
1191	Protein of unknown function	3	H09G03.1	H09G03.1	H09G03.1	284	129	155	321	314	7	386	378	8	0	19.375	4.27612
1192	Protein with moderate similarity to C. elegans Y46E12A.A gene product	3	H14E04.2	H14E04.2	H14E04.2A	595	133	462	785	318	467	945	383	562	0	0.822	-0.28279
1193	Protein containing three SET domains, which are involved in protein-protein interactions, and two RNA recognition motifs (RRM, RBD, or RNP), has a region of moderate similarity to a region of S. cerevisiae Set1p, which mediates methylation of histone H3	3	set-2/C26E6.9	C26E6.9	C26E6.9	708	134	574	737	328	409	887	395	492	0	1.167	0.222805
1194	Protein containing 4 extracellular laminin G domains and 2 epidermal growth factor (EGF)-like domains, has a region of weak similarity to neurexin 4 (contactin associated protein 1, human CNTNAP1), which is a neuronal paranodal transmembrane receptor	5	C29A12.4	C29A12.4	C29A12.5	583	130	453	578	334	244	696	402	294	0	1.541	0.623867
1195	Protein containing an immunoglobulin (Ig) domain, 12 type 1 thrombospondin domains and 17 kunitz or bovine pancreatic trypsin inhibitor domains, has a region of low similarity to a region of C. elegans GON-1, which is a metalloprotease	5	C37C3.6	C37C3.6	C37C3.6	648	127	521	634	342	292	763	412	351	0	1.484	0.569491
1196	Protein of unknown function	4	C42D4.13	C42D4.13	C42D4.13	323	129	194	395	352	43	475	424	51	0	3.804	1.92752
1197	Protein of unknown function	4	C46G7.4	C46G7.4	C46G7.4	390	134	256	380	291	89	457	350	107	0	2.393	1.25882
1198	Proprotein convertase; processes prohormones and proneuropeptides by endoproteolytic cleavage; similar to Kex2-like serine endoproteases	5	egl-3/Cepc2/kpc-2/C51E3.7	C51E3.7	C51E3.7	2789	149	2640	1475	294	1181	1777	354	1423	0	1.855	0.891419
1199	Protein related to human adenomatous polyposis coli (APC) gene product, has multiple roles in morphogenesis	1	apr-1/K04G2.8	K04G2.8	K04G2.8	1082	143	939	799	286	513	962	344	618	0	1.519	0.603122
1200	Protein involved in cell division, has weak similarity to human and D. melanogaster CDC25 homologs	1	K06A5.7/cdc-25.1	K06A5.7	K06A5.7	1006	143	863	725	286	439	873	344	529	0	1.631	0.705757
1201	Protein with high similarity to UDP-glucose pyrophosphorylase 2 (human UGP2), which catalyzes the formation of UDP-glucose from glucose-1-phosphate and MgUTP, member of the UTP-glucose-1-phosphate uridylyltransferase family	3	K08E3.5	K08E3.5	K08E3.5	3676	142	3534	2416	290	2126	2910	349	2561	0	1.38	0.464668
1202	HNF-3/forkhead transcription factor required for both inhibition and promotion of vulval cell fates	2	lin-31/K10G6.1	K10G6.1	K10G6.1	576	135	441	631	287	344	760	345	415	0	1.063	0.0881416
1203	Protein containing six WD domains (WD-40 repeat), which may mediate protein-protein interactions, has low similarity to m-tomosyn (rat LOC81022), which is a SNARE binding protein that interacts with syntaxin 1a (rat Stx1a)	1	M01A10.2	M01A10.2	M01A10.2	569	147	422	436	287	149	525	345	180	0	2.344	1.22897
1204		1		X96762-1.M01E5	M01E5.5	2515	144	2371	1720	290	1430	2072	349	1723	0	1.376	0.46048
1205		4		Y38C1BA.3	Y38C1BA.G	339	129	210	442	285	157	532	343	189	0	1.111	0.151859
1206		2		Y38E10A.1	Y38E10A.A	252	124	128	340	284	56	409	342	67	0	1.91	0.933573
1207	Putative ortholog of C. elegans F10G2.3 gene product	2	Y38E10A.4/Y38E10A.D	Y38E10A.4	Y38E10A.D	267	122	145	371	288	83	446	346	100	0	1.45	0.536053
1208	Protein with weak similarity to C. elegans unc-89, a muscle cell protein of the immunoglobulin-like protein family that is required for coordinated locomotion	2	Y38E10A.6	Y38E10A.6	Y38E10A.F	415	124	291	633	285	348	762	343	419	0	0.695	-0.524915
1209	Protein with strong similarity to C. elegans pek-1 gene product	2	Y38E10A.8/Y38E10A.H	Y38E10A.8	Y38E10A.H	274	120	154	377	283	94	454	340	114	0	1.351	0.434028
1210		2		Y38E10A.12	Y38E10A.	295	122	173	438	290	148	527	349	178	0	0.972	-0.0409718
1211	Protein of unknown function, putative paralog of C. elegans Y39D8B.3	5	Y39D8B.2	Y39D8B.2	Y39D8B.C	244	128	116	343	294	49	413	354	59	0	1.966	0.975263
1212	Putative paralog of C. elegans R107.4	2	Y39G8B.5	Y39G8B.5	Y39G8B.E	375	121	254	731	296	435	880	356	524	0	0.485	-1.04394
1213	Protein of unknown function, has strong similarity to C. elegans F01D5.1	2	Y39G8B.7	Y39G8B.7	Y39G8B.G	327	117	210	628	304	324	756	366	390	0	0.538	-0.894322
1214		1		W03F11.6a	Y39G10A_236.D	202	127	75	413	308	105	497	371	126	0	0.595	-0.749038
1215	Putative ortholog of D. melanogaster Trip1 (Trip1)	1	Y74C10AR.1/Y74C10AR.B	Y74C10AR.1	Y39G10A_237.B	1809	131	1678	1126	315	811	1356	379	977	0	1.718	0.78073
1216		m		no_gene	Y39G10A_241.B	940	128	812	1224	317	907	1474	381	1093	0	0.743	-0.428566
1217	Putative ortholog of C. elegans Y55D5A.I gene product	3	Y55D5A.1	Y55D5A.1	Y55D5A_392.F	413	128	285	640	315	325	771	379	392	0	0.727	-0.459973
1218		4		Y55F3BR.4	Y55F3A_747.G	271	134	137	395	318	77	475	383	92	0	1.489	0.574344
1219	Protein with moderate similarity to D. melanogaster CG11183 (CG11183 gene product)	4	Y55F3AM.12	Y55F3AM.12	Y55F3A_748.C	487	135	352	731	328	403	880	395	485	0	0.726	-0.461959
1220		4		no_gene	Y55F3A_748.H	214	134	80	398	334	64	479	402	77	0	1.039	0.0551957
1221	Putative ortholog of C. elegans F30H5.3 gene product	4	Y55F3BR.2/Y55F3BR.K	Y55F3BR.2	Y55F3A_749.B	449	126	323	690	342	348	831	412	419	0	0.771	-0.375197
1222		m		Y55F3C.6	Y55F3C.C	304	127	177	499	347	152	601	418	183	0	0.967	-0.0484122
1223	Putative paralog of C. elegans C41G7.6	4	Y59E9AL.6	Y59E9AL.6	Y59E9_118.E	327	135	192	1515	286	1229	1825	344	1481	0	0.13	-2.94342
1224	Protein of unknown function, putative paralog of C. elegans Y59E9AR.8	4	Y59E9AR.2	Y59E9AR.2	Y59E9_120.B	255	139	116	370	287	83	445	345	100	0	1.16	0.214125
1225	Putative paralog of C. elegans T07G12.5	4	Y59E9AL.4	Y59E9AL.4	Y59E9_122.A	447	133	314	628	284	344	756	342	414	0	0.758	-0.39973
1226		X		Y60A9.3	Y60A9B.A	272	140	132	528	284	244	636	342	294	0	0.449	-1.15521
1227	Protein of unknown function, has moderate similarity to C. elegans H02F09.4	5	Y61A9LA.9	Y61A9LA.9	Y61A9LA_69.A	691	135	556	721	283	438	868	340	528	0	1.053	0.0745054
1228	Ortholog of Son of sevenless, a guanine nucleotide exchange factor in the Ras developmental signaling pathway, believed to stimulate the Ras GTPase LET-60	5	sos-1/let-341/Y61A9LA.6	Y61A9LA.6	Y61A9LA_70.A	353	130	223	576	288	288	693	346	347	0	0.643	-0.637109
1229		3		multiple	Y119D3_462.A	493	137	356	690	294	396	831	354	477	0	0.746	-0.422752
1230	Putative ortholog of C. elegans Y82E9BL.7 gene product	3	Y119D3A.2/Y119D3A.C	Y119D3A.2	Y119D3_462.C	282	127	155	337	289	48	406	348	58	0	2.672	1.41792
1231	Protein of unknown function	3	Y46E12A.2/Y46E12A.C	Y46E12A.2	Y119D3_463.C	339	121	218	668	283	385	804	340	464	0	0.47	-1.08927
1232	Protein with strong similarity to C. elegans R155.2 gene product	3	Y22D7AR.1/Y22D7AR.M	Y22D7AR.1	Y119D3_464.B	418	120	298	453	281	172	545	338	207	0	1.44	0.526069
1233	Putative ortholog of C. elegans R06B10.1 gene product	3	Y22D7AR.12	Y22D7AR.12	Y119D3_464.F	240	118	122	418	281	137	503	338	165	0	0.739	-0.436354
1234	Putative ortholog of C. elegans C39B5.12 gene product	3	Y22D7AR.8/Y22D7AR.F	Y22D7AR.8	Y119D3_464.I	237	121	116	312	280	32	375	337	38	0	3.053	1.61023
1235	Putative paralog of C. elegans E01A2.8	1	E01A2.7	E01A2.7	E01A2.C	338	121	217	599	284	315	721	342	379	0	0.573	-0.803393
1236	Protein of unknown function	2	F12E12.6/F12E12.D	F12E12.6	F12E12.D	294	121	173	601	291	310	724	350	374	0	0.463	-1.11092
1237		4		F26D12.1	F26D12.B	755	124	631	657	287	370	791	345	446	0	1.415	0.500802
1238	Putative paralog of C. elegans ZK1240.2	2	F43C11.8	F43C11.8	F43C11_37.C	335	120	215	642	289	353	773	348	425	0	0.506	-0.982791
1239		2		no_gene	F45D11.J	287	119	168	612	298	314	737	359	378	0	0.444	-1.17137
1240	Putative paralog of C. elegans F56A4.12	5	F56A4.11	F56A4.11	F56A4.B	482	127	355	661	309	352	796	372	424	0	0.837	-0.2567
1241	Protein with moderate similarity to C. elegans uaf-1 gene product	3	Y82E9BR.2	Y82E9BR.2	Y119D3_457.A	489	130	359	513	311	202	618	374	244	0	1.471	0.556797
1242	Putative ortholog of C. elegans Y82E9BR.7 gene product	3	Y82E9BR.8	Y82E9BR.8	Y119D3_465.B	201	119	82	246	311	-65	296	374	-78	0
1243	Putative ortholog of C. elegans ZK105_3.A gene product	5	ZK105.6/ZK105.A	ZK105.6	ZK105.A	233	115	118	349	313	36	420	377	43	0	2.744	1.45628
1244	Putative paralog of C. elegans ZK973_14.A	1	ZK973.11	ZK973.11	ZK973.A	1165	127	1038	1278	317	961	1539	381	1158	0	0.896	-0.158429
1245	Protein of unknown function, putative paralog of C. elegans ZK973_14.D	1	ZK973.8	ZK973.8	ZK973.D	239	123	116	387	319	68	466	384	82	0	1.415	0.500802
1246	Protein of unknown function	2	C15F1.8	C15F1.8	C15F1.A	482	121	361	592	327	265	713	393	320	0	1.128	0.173767
1247		5		Y39B6B.l	Y39B6B.	263	122	141	563	336	227	678	404	274	0	0.515	-0.957356
1248	Protein of unknown function, putative paralog of C. elegans Y39G8B.4	2	Y39G8B.3	Y39G8B.3	Y39G8B.C	233	120	113	465	339	126	560	408	152	0	0.743	-0.428566
1249		5		multiple	Y39H10A_225.C	397	126	271	427	277	150	514	333	181	0	1.497	0.582074
1250	Protein of unknown function, putative paralog of C. elegans Y38C1_87.E	4	Y38C1BA.1	Y38C1BA.1	Y41D4A_4723.C	281	131	150	416	273	143	501	328	173	0	0.867	-0.205896
1251	Putative paralog of C. elegans Y46C8AL.E	4	Y46C8AL.5/Y46C8AL.H	Y46C8AL.5	Y46C8_97.B	571	129	442	654	281	373	787	338	449	0	0.984	-0.0232698
1252	Putative ortholog of the S. cerevisiae GSY1 gene product, UDP-glucose-starch glucosyltransferase, or glycogen synthetase isoform 1	2	Y46G5A.31	Y46G5A.31	Y46G5.KK	1588	126	1462	1071	281	790	1290	338	952	0	1.536	0.619178
1253	Protein of unknown function	4	F56F12.1	F56F12.1	F56F12.8	323	127	196	515	279	236	620	336	284	0	0.69	-0.535332
1254		2		F59H6.3	F59H6.3	1966	130	1836	1992	289	1703	2400	348	2052	0	0.895	-0.16004
1255		5		K02H11.8	K02H11.8	263	122	141	345	285	60	415	343	72	0	1.958	0.969381
1256	Protein with moderate similarity to C. elegans M162.1 gene product	5	M162.6	M162.6	M162.6	187	114	73	266	279	-13	320	336	-16	0
1257	TcA transposase	m	R173.2	R173.2	R173.2	277	118	159	365	280	85	439	337	102	0	1.559	0.640621
1258	Member of the ribonucleotide reductase small chain family, has a region of high similarity to a region of p53-inducible ribonucleotide reductase small subunit 2 homolog (human RRM2B), which converts ribonucleotides to deoxyribonucleotides	m	F19G12.2	F19G12.2	T13A10.3	406	121	285	459	281	178	553	338	215	0	1.326	0.407081
1259		2		Y43F11A.2	Y43F11A.2	260	119	141	477	281	196	574	338	236	0	0.597	-0.744197
1260	Protein of unknown function, putative paralog of C. elegans Y43F11.E	2	Y43F11A.5	Y43F11A.5	Y43F11A.5	473	122	351	417	284	133	502	342	160	0	2.194	1.13356
1261	Putative ortholog of S. cerevisiae Erb1p, a protein of unknown function	2	Y48B6A.1/Y48B6A.A	Y48B6A.1	Y48B6A.1	904	121	783	1040	290	750	1253	349	904	0	0.866	-0.207561
1262	Putative ortholog of C. elegans acr-16 gene product	2	Y48B6A.4	Y48B6A.4	Y48B6A.4	417	123	294	775	293	482	933	353	580	0	0.507	-0.979942
1263	Protein containing two EF hand domains, which are found in signaling, buffering or transport proteins	2	Y48B6A.6/Y48B6A.G	Y48B6A.6	Y48B6A.6	614	124	490	1003	293	710	1208	353	855	0	0.573	-0.803393
1264	Acetylcholine esterase	2	ace-3/ace-y/Y48B6A.8/Y119D3_455.A	Y48B6A.8	Y48B6A.8	818	126	692	989	295	694	1191	355	836	0	0.828	-0.272297
1265		3		multiple	Y53G8A_2702.C	301	128	173	443	300	143	533	361	172	0	1.006	0.00863031
1266		3		multiple	Y53G8A_2706.A	525	123	402	819	309	510	986	372	614	0	0.655	-0.610433
1267	Putative ortholog of C. elegans Y53G8AR.G gene product	3	Y53G8AR.2	Y53G8AR.2	Y53G8A_6046.A	437	119	318	765	309	456	921	372	549	0	0.579	-0.788365
1268	Putative paralog of C. elegans Y53G8B_93.B	3	Y53G8B.2	Y53G8B.2	Y53G8B_93.B	585	118	467	823	307	516	991	369	622	0	0.751	-0.413115
1269	Putative ortholog of S. cerevisiae SPB1 gene product; Putative S-adenosyl-methionine-dependent methyltransferase required for synthesis of 60S ribosomal subunit	3	H06I04.3	H06I04.3	Y53G8B_1025.C	914	119	795	1071	312	759	1290	375	915	0	0.869	-0.202572
1270	Protein of unknown function	1	Y54E10A.2	Y54E10A.2	Y54E10A_155.C	339	122	217	686	319	367	826	384	442	0	0.491	-1.02621
1271		X		multiple	Y59E1B.C	406	120	286	738	319	419	889	384	505	0	0.566	-0.821126
1272	Putative ortholog of C. elegans Y61A9LA.A gene product	5	Y61A9LA.10	Y61A9LA.10	Y61A9LA_74.A	403	122	281	764	326	438	920	392	528	0	0.532	-0.910502
1273		4		Y62E10A.8	Y62E10A.G	493	126	367	994	333	661	1197	401	796	0	0.461	-1.11716
1274	Protein with weak similarity to S. cerevisiae LSM3 (U6 snRNA-associated protein of the Sm-like group)	4	Y62E10A.12	Y62E10A.12	Y62E10A.	698	119	579	1087	338	749	1309	407	902	0	0.642	-0.639355
1275		2		no_gene	Y62F5A.D	400	123	277	523	269	254	630	324	306	0	0.905	-0.14401
1276	Putative ortholog of C. elegans Y65B4A.F gene product	1	Y65B4A.5	Y65B4A.5	Y65B4A_175.A	443	144	299	704	279	425	848	336	512	0	0.584	-0.77596
1277	Protein containing a CCCH-type zinc finger domain, which bind DNA or RNA, has moderate similarity to uncharacterized human HT010	1	F27D4.4	F27D4.4	F27D4.4#2	3587	144	3443	4152	292	3860	5002	351	4651	0	0.74	-0.434403
1278	Protein of unknown function, has strong similarity to C. elegans Y105C5.A	5	F28F8.7	F28F8.7	F28F8.7#2	542	129	413	555	282	273	668	339	329	0	1.255	0.327687
1279	Member of the protein-tyrosine phosphatase family, which are involved in control of cell growth, proliferation, differentiation and transformation, has a region of low similarity to a region of human PTPRG, which is a protein tyrosine phosphatase	2	F35C11.2	F35C11.2	F35C11.2#2	243	128	115	381	278	103	459	334	125	0	0.92	-0.120294
1280					F40F12.5#2	308	141	167	578	290	288	696	349	347	0	0.481	-1.05589
1281	Protein with high similarity to C. elegans DPY-16, which is a collagen involved in epithelium morphogenesis, contains two collagen triple helix repeats, which are found in some extracellular proteins	5	F55C10.3	F55C10.3	F55C10.3#2	5018	126	4892	5187	287	4900	6249	345	5904	0	0.829	-0.270556
1282	Protein of unknown function, has moderate similarity to C. elegans F09C3.4	5	K03D7.7	K03D7.7	K03D7.7#2	281	121	160	323	283	40	389	340	49	0	3.265	1.70708
1283	Putative 60 KDa subunit of SWI/SNF complex, possible ortholog of human SMARCD3 (Hs.77069, SWI/SNF-related, actin-dependent regulator of chromatin)	3	ZK1128.5	ZK1128.5	ZK1128.5#2	841	123	718	837	281	556	1008	338	670	0	1.072	0.100305
1284	Part of the class B pathway that antagonizes vulval induction and is required for male tail andgonad development	3	lin-9/lin-9l/lin-9s/ZK637.7	ZK637.7	ZK637.7#2	665	120	545	567	278	289	683	334	349	0	1.562	0.643394
1285	Putative paralog of C. elegans C29E6.3, has similarity to C. elegans C15H7.3, a member of the protein-tyrosine phosphatase protein family	4	ZK809.1	ZK809.1	ZK809.1#2	331	123	208	697	281	416	839	338	501	0	0.415	-1.26882
1286	TcA transposase	m	B0213.1	B0213.1	B0213.1#2	292	126	166	348	285	63	419	343	76	0	2.184	1.12697
1287	Member of the Tc3 Transposase protein family	m	B0303.5	B0303.5	B0303.5#2	402	120	282	356	291	65	428	350	78	0	3.615	1.854
1288	Protein containing two protein kinase domains, has a region of low similarity to rat LOC60328, which is a microtubule/MAP-affinity regulating kinase that participates in microtubule stability and control of cell polarity	4	B0496.3	B0496.3	B0496.3#2	474	120	354	504	294	210	607	354	253	0	1.399	0.484396
1289	Protein of unknown function, has low similarity to uncharacterized C. elegans Y47H9B.2	1	F36D1.6	F36D1.6	F36D1.6#2	180	126	54	236	297	-61	284	357	-73	0
1290	Protein of unknown function, has moderate similarity to uncharacterized human KIAA0475	X	H03A11.1	H03A11.1	H03A11.1#2	656	130	526	672	306	366	809	368	441	0	1.193	0.254594
1291	Probable aspartyl protease and an ortholog of human cathepsin D	X	asp-3/H22K11.1	H22K11.1	H22K11.1#2	5550	135	5415	12734	315	12419	15342	379	14963	0	0.362	-1.46594
1292	Member of the cofilin or tropomyosin-type actin-binding protein family, which depolymerize actin filaments and bind actin, contains a Src homology 3 (SH3) domain, has low similarity to human HIP-55, which is an SH3 adaptor protein that may bind actin	3	K08E3.4	K08E3.4	K08E3.4#2	1048	128	920	2086	313	1773	2513	377	2136	0	0.431	-1.21424
1293	Protein containing six C2H2 type zinc finger domains, has a region of low similarity to a region of C. elegans HAM-2, which is a putative transcription factor required for hermaphrodite-specific neuron migration and a downstream target of C. elegans EGL-5	5	T05G11.1	T05G11.1	T05G11.1#2	283	117	166	350	312	38	421	375	46	0	3.609	1.8516
1294	Protein containing an F-box domain, which serve as a link between a target protein and a ubiquitin-conjugating enzyme, has high similarity to uncharacterized C. elegans T17A3.4	3	T17A3.7	T17A3.7	T17A3.7#2	383	119	264	404	317	87	486	381	105	0	2.514	1.32998
1295	Sperm-specific protein involved in sperm motility, member of the major sperm protein (MSP) family	4	msp-19/F36H12.7	F36H12.7	F36H12.7#2	393	122	271	2583	322	2261	3112	387	2725	0	0.099	-3.33643
1296	Protein containing a transcriptional adaptor putative zinc finger (TAZ) domain, which may bind transcriptional activators and repressors, has high similarity to a region of C. elegans CBP-1, which is a transcriptional activator	3	F40F12.7	F40F12.7	F40F12.7#2	2900	126	2774	3632	333	3299	4375	401	3974	0	0.698	-0.518701
1297		X		multiple	K01A12.1#2	607	125	482	1046	326	720	1260	392	868	0	0.555	-0.84944
1298					R08C7.1#2	329	125	204	352	323	29	424	389	35	0	5.829	2.54325
1299	Member of the Skp1 family, which are required for targeted protein degradation during the cell cycle, has moderate similarity to uncharacterized C. elegans SKR-1	X	skr-19/R12H7.3	R12H7.3	R12H7.3#2	626	126	500	950	327	623	1144	393	751	0	0.666	-0.586406
1300	Protein containing a protein kinase domain and a Src homology 2 (SH2) domain, which are regulatory modules of intracellular signaling, has moderate similarity to fer (fps/fes related) tyrosine kinase (mouse Fert2)	4	T04B2.2	T04B2.2	T04B2.2#2	272	119	153	368	332	36	443	400	43	0	3.558	1.83107
1301	Protein of unknown function, has a region of high similarity to a region of branched-chain alpha-keto acid dehydrogenase E1 alpha subunit (human BCKDHA), which catalyzes mitochondrial oxidative decarboxylation of leucine, isoleucine, and valine	3	Y43F4A.4	Y43F4A.4	Y43F4A.4#2	651	123	528	600	266	334	722	320	402	0	1.313	0.392867
1302	Protein of unknown function	1	Y47H9B.1	Y47H9B.1	Y47H9B.1#2	228	130	98	278	273	5	334	328	6	0	16.333	4.02972
1303	Protein containing two CCCH-type zinc finger domains, which bind DNA or RNA, has a region of high similarity to a region of C. elegans POS-1, which is a zinc-finger protein involved in regulation of early morphogenesis	4	Y57G11C.25	Y57G11C.25	Y57G11C.25#2	403	143	260	397	294	103	478	354	124	0	2.097	1.06833
1304	Protein of unknown function, has weak similarity to C. elegans Y62H9A.5	X	Y62H9A.3	Y62H9A.3	Y62H9A.3#2	1860	151	1709	2502	290	2212	3014	349	2665	0	0.641	-0.641604
1305	Protein of unknown function, has very strong similarity to uncharacterized C. elegans C41G6.13	5	Y75B12B.8	Y75B12B.8	Y75B12B.8#2	2451	131	2320	1708	281	1427	2057	338	1719	0	1.35	0.432959
1306	Protein containing a BTB (BR-C, ttk and babor) or POZ (Pox virus and zinc finger) domain, which are found in some DNA and actin binding proteins and may mediate protein-protein interactions, has low similarity to uncharacterized C. elegans F57C2.1	2	ZC204.3	ZC204.3	ZC204.3#2	286	127	159	407	282	125	490	339	151	0	1.053	0.0745054
1307	Protein containing two meprin and TRAF homology (MATH) domains, has high similarity to uncharacterized C. elegans C16C4.15	2	C16C4.4	C16C4.4	C16C4.4#2	481	126	355	603	283	320	726	340	386	0	0.92	-0.120294
1308	Protein containing a nuclear hormone receptor ligand-binding domain and a nuclear hormone receptor C4-type zinc finger domain, which bind DNA and may be involved in regulation of transcription, has low similarity to C. elegans NHR-51	5	C17E7.6	C17E7.6	C17E7.6#2	353	120	233	450	281	169	542	338	204	0	1.142	0.191563
1309	Protein of unknown function	5	C18C4.1	C18C4.1	C18C4.1#2	272	121	151	402	279	123	484	336	148	0	1.02	0.0285692
1310	Protein containing a DUF216 domain of unknown function, has low similarity to uncharacterized C. elegans Y68A4A.6	5	C18D4.9	C18D4.9	C18D4.9#2	214	117	97	327	278	49	393	334	59	0	1.644	0.71721
1311	Protein of unknown function, has weak similarity to C. elegans R11D1.2	3	C23G10.5	C23G10.5	C23G10.5#2	320	117	203	388	277	111	467	333	134	0	1.515	0.599318
1312	Protein of unknown function	3	C29F9.4	C29F9.4	C29F9.4#2	512	124	388	949	278	671	1143	334	809	0	0.48	-1.05889
1313	Protein with moderate similarity to C. elegans T24E12.9 gene product	X	C36C9.5	C36C9.5	C36C9.5	329	122	207	592	282	310	713	339	374	0	0.553	-0.854649
1314	Protein containing three meprin and TRAF homology (MATH) domains, has high similarity to uncharacterized C. elegans C46F9.3	2	C40A11.1	C40A11.1	C40A11.1	506	121	385	746	286	460	898	344	554	0	0.695	-0.524915
1315	Protein of unknown function	X	C43H6.1	C43H6.1	C43H6.1	576	122	454	718	294	424	865	354	511	0	0.888	-0.171368
1316	Protein with high similarity to mitochondrial aspartate aminotransferase (human GOT2), which transfers aspartate amino groups to 2-oxoglutarate forming oxaloacetate and glutamate, contains an aminotransferase class I and II domain	1	C44E4.3	C44E4.3	C44E4.3	891	125	766	1000	303	697	1204	365	839	0	0.913	-0.131313
1317	Protein containing neurotransmitter-gated ion-channel ligand binding and transmembrane domains, has low similarity to glycine receptor alpha 2 subunit (rat Glra2), which plays an important role in inhibiting neurotransmitter release	X	gbr-5/C45B2.4	C45B2.4	C45B2.4	352	124	228	324	308	16	390	371	19	0	12	3.58496
1318	Protein with high similarity to rat Ppp1cb, which is the catalytic subunit of a serine-threonine phosphatase that regulates many metabolic processes, member of the serine or threonine protein phosphatase family	4	C47A4.3	C47A4.3	C47A4.3	281	123	158	360	302	58	433	363	70	0	2.257	1.17441
1319	Protein of unknown function, has high similarity to uncharacterized C. elegans Y68A4A.10	5	F20E11.7	F20E11.7	F20E11.7	198	114	84	273	306	-33	328	368	-40	0
1320	Protein of unknown function, has weak similarity to human myosin phosphatase target subunit 1	5	F21A3.4	F21A3.4	F21A3.4	235	115	120	436	311	125	525	374	151	0	0.795	-0.330973
1321	Member of the T-box protein family	3	tbx-2/F21H11.3	F21H11.3	F21H11.3	568	120	448	806	318	488	971	383	588	0	0.762	-0.392137
1322	Protein of unknown function, has strong similarity to C. elegans F13A7.7	X	F22H10.4	F22H10.4	F22H10.4	216	126	90	285	325	-40	343	391	-48	0
1323	Avermectin-sensitive glutamate-gated chloride channel GluCl-beta subunit	1	F25F8.2	F25F8.2	F25F8.2	505	127	378	515	328	187	620	395	225	0	1.68	0.748461
1324	Protein of unknown function	4	F27C8.2	F27C8.2	F27C8.2	310	125	185	512	323	189	616	389	227	0	0.815	-0.295128
1325					COLIBACTER97	270	126	144	592	321	271	713	386	327	0	0.44	-1.18442
1326					COLIBACTER99	245	125	120	476	320	156	573	385	188	0	0.638	-0.648372
1327					COLIBACTER101	224	120	104	437	258	179	526	310	216	0	0.481	-1.05589
1328					COLIBACTER103	193	119	74	360	260	100	433	313	120	0	0.617	-0.696658
1329					COLIBACTER105	224	124	100	491	274	217	591	330	261	0	0.383	-1.38458
1330					COLIBACTER107	260	135	125	448	277	171	539	333	206	0	0.607	-0.720232
1331					COLIBACTER145	269	127	142	602	273	329	725	328	397	0	0.358	-1.48197
1332					COLIBACTER147	221	114	107	424	271	153	510	326	184	0	0.582	-0.780909
1333					COLIBACTER149	177	116	61	360	270	90	433	325	108	0	0.565	-0.823677
1334					COLIBACTER151	231	116	115	452	269	183	544	324	220	0	0.523	-0.935117
1335					COLIBACTER153	269	116	153	412	273	139	496	328	168	0	0.911	-0.134477
1336					COLIBACTER155	212	115	97	309	273	36	372	328	44	0	2.205	1.14078
1337		n		no_pcr	LUCIFERASE	174	119	55	201	274	-73	242	330	-88	0
1338		n		no_pcr	LUCIFERASE	233	123	110	150	275	-125	180	331	-151	0
1339		n		no_pcr	LUCIFERASE	200	121	79	167	275	-108	201	331	-130	0
1340		n		no_pcr	LUCIFERASE	176	120	56	195	282	-87	234	339	-105	0
1341		n		no_pcr	LUCIFERASE	173	119	54	223	287	-64	268	345	-77	0
1342		n		no_pcr	LUCIFERASE	176	121	55	198	287	-89	238	345	-107	0
1343					INTERGENIC_CONTROL#3	152	116	36	448	291	157	539	350	189	0	0.19	-2.39593
1344					INTERGENIC_CONTROL#3	160	113	47	474	293	181	571	353	218	0	0.216	-2.2109
1345					INTERGENIC_CONTROL#3	158	114	44	457	298	159	550	359	191	0	0.23	-2.12029
1346					INTERGENIC_CONTROL#3	162	118	44	494	302	192	595	363	232	0	0.19	-2.39593
1347					INTERGENIC_CONTROL#3	140	121	19	423	314	109	509	378	131	0	0.145	-2.78588
1348					INTERGENIC_CONTROL#3	171	123	48	515	315	200	620	379	241	0	0.199	-2.32916
1353	Protein containing a UDP-glucoronosyl and UDP-glucosyl transferase domain, which transfer glycosyl groups to small hydrophobic molecules, has weak similarity to UDP-glycosyltransferase 1 A9 (human UGT1A9), which plays a role in drug metabolism	5	AC3.7	AC3.7	AC3.7	608	125	483	726	331	395	874	398	476	0	1.015	0.0214797
1354	Member of the mitochondrial tricarboxylate carrier (MTC) protein family	2	AH6.2	AH6.2	AH6.2	201	123	78	262	190	72	315	228	87	0	0.897	-0.15682
1355	G protein-coupled receptor; member of a subfamily with SRA proteins, which are expressed in chemosensory neurons; no homolog found in human or D. melanogaster	2	sra-4/AH6.8	AH6.8	AH6.8	181	120	61	223	137	86	268	165	103	0	0.592	-0.756331
1356	Protein of unknown function, has low similarity to uncharacterized C. elegans B0001.8	4	B0001.5	B0001.5	B0001.5	608	131	477	449	129	320	540	155	385	0	1.239	0.309176
1357	Protein containing two collagen triple helix repeats, which are found in some extracellular proteins, and a nematode cuticle collagen N-terminal domain, has low similarity to C. elegans ROL-6	5	B0024.2	B0024.2	B0024.2	1780	147	1633	1241	134	1107	1495	161	1334	0	1.224	0.291604
1358	Member of the ammonium transporter family of membrane transporters, has moderate similarity to rhesus glycoprotein type C (human RHCG), which is an ammonium transporter that is expressed in nonerythroid tissues	5	rhr-2/B0240.1	B0240.1	B0240.1	337	146	191	311	137	174	374	165	209	0	0.914	-0.129734
1359	Member of the SCP-like extracellular protein family, has a region of low similarity to a region of S. cerevisiae Pry1p, which may have a role in mating efficiency	X	C07A4.3	C07A4.3	C07A4.3	260	125	135	286	133	153	344	160	184	0	0.734	-0.446148
1360	Protein of unknown function, has low similarity to a region of C. elegans PHA-1, which is involved in pharyngeal development	2	C07E3.8	C07E3.8	C07E3.8	294	121	173	246	134	112	296	161	135	0	1.281	0.35727
1361	Protein containing a bZIP (basic-leucine zipper) transcription factor domain	3	C07G2.2	C07G2.2	C07G2.2	1064	135	929	900	143	757	1084	172	912	0	1.019	0.0271541
1362	Member of the ARID DNA binding domain protein family	2	C08B11.3	C08B11.3	C08B11.3	671	162	509	531	154	377	639	185	454	0	1.121	0.164786
1363	Member of the glycosyl hydrolase 18 family, has weak similarity to chitinase 3-like 1 (cartilage glycoprotein-39, human CHI3L1), which binds chitin but does not have chitinase activity and is expressed in rheumatoid arthritis cartilage and synovial cells	2	C08H9.6	C08H9.6	C08H9.6	393	142	251	265	138	127	319	166	153	0	1.641	0.714575
1364	Member of the glycosyl hydrolase 18 family, has a region of weak similarity to a region of chitinase 1 (chitotriosidase, human CHIT1), which is a chitinase that is implicated in chitotriosidase deficiency upon mutation	2	C08H9.10	C08H9.10	C08H9.10	277	127	150	325	122	203	391	146	245	0	0.612	-0.708396
1365	Protein of unknown function, has high similarity to uncharacterized C. elegans F53F1.11	5	F53F1.10	F53F1.10	F53F1.10	1171	122	1049	476	113	363	573	136	437	-100	2.4	1.26303
1366	Protein of unknown function	5	F53F4.4	F53F4.4	F53F4.4	596	129	467	503	115	388	606	138	468	0	0.998	-0.00288828
1367	Protein of unknown function, has moderate similarity to the N-terminus of H. sapiens Hs.129849 gene product, PBK1, which is expressed in first trimester placentae	5	F53F4.11	F53F4.11	F53F4.11	1391	141	1250	999	144	855	1203	173	1030	0	1.214	0.279768
1368	Protein containing a von Willebrand factor (vWF) type A domain	5	C29A12.6	C29A12.6	F53H10.1	311	140	171	234	150	84	281	180	101	0	1.693	0.759582
1369	Protein with strong similarity to human COL9A1, alpha-1 collagen, type IX	X	col-9/F54B11.1	F54B11.1	F54B11.1	284	129	155	282	156	126	339	187	152	0	1.02	0.0285692
1370	Protein with high similarity to short chain L-3-hydroxyacyl-Coenzyme A (human HADHSC), which is involved in fatty acid beta oxidation and is associated with hyperinsulinism, contains 3-hydroxyacyl-CoA dehydrogenase C-terminal and NAD binding domains	3	F54C8.1	F54C8.1	F54C8.1	348	127	221	449	205	244	540	246	294	0	0.752	-0.411195
1371	Protein containing a formin homology 2 domain, which are found in proteins that control rearrangements of the actin cytoskeleton	3	K01B6.1	K01B6.1	K01B6.1	878	134	744	1103	359	744	1328	432	896	0	0.83	-0.268817
1372	Protein of unknown function	2	K01C8.5	K01C8.5	K01C8.5	769	152	617	1249	433	816	1504	521	983	0	0.628	-0.671164
1373	Protein of unknown function, has high similarity to uncharacterized C. elegans Y87G2A.12	5	K01D12.2	K01D12.2	K01D12.2	342	150	192	525	422	103	632	508	124	0	1.548	0.630405
1374	Protein with strong similarity to beta tubulin (C. elegans BEN-1), member of the tubulin-FtzA family, which are involved in polymer formation	3	K01G5.7	K01G5.7	K01G5.7	4968	147	4821	4877	422	4455	5875	508	5367	0	0.898	-0.155213
1375	Protein of unknown function, has strong similarity to uncharacterized C. elegans W03G1.4	m	K02B7.1	K02B7.1	K02B7.1	374	167	207	524	446	78	631	537	94	0	2.202	1.13881
1376	Member of the zinc metalloprotease protein family	5	K03B8.1	K03B8.1	K03B8.1	257	160	97	355	421	-66	427	507	-80	0
1377		2		AB023424-1.C47D12	C47D12.7	650	158	492	827	416	411	996	501	495	0	0.994	-0.00868224
1378	Member of the glycosyl hydrolase 47 family of alpha-mannosidases, which hydrolyze terminal mannose residues, has moderate similarity to a region of S. cerevisiae Mnl1p, which is involved in endoplasmic reticulum-associated degradation of glycoproteins	4	C47E12.3	C47E12.3	C47E12.3	473	180	293	539	432	107	649	520	129	0	2.271	1.18333
1379	Protein with high similarity to ubiquitin-activating enzyme E1 (mouse Ube1x), which activates ubiquitin to mark proteins for proteasomal degradation, member of the UBA-THIF-type NAD-FAD binding fold family that also contains a UBACT repeat	4	C47E12.5	C47E12.5	C47E12.5	659	135	524	517	326	191	622	392	230	0	2.278	1.18777
1380	Heat shock protein 90, and apparently the only C. elegans ortholog of human Hsp90; involved in dauer larva formation	5	daf-21/HSP90/C47E8.5	C47E8.5	C47E8.5	8358	159	8199	7580	335	7245	9132	403	8729	0	0.939	-0.0908029
1381	Protein of unknown function, has weak similarity to C. elegans F35E2.8	1	C47F8.1	C47F8.1	C47F8.1	260	172	88	361	338	23	434	407	27	0	3.259	1.70443
1382	Member of the galactosyltransferase family, which transfer galactose to GlcNAc termini of growing oligosaccharide chains, has a region of low similarity to UDP-galactose:beta-N-acetylglucosamine beta 1,3-galactosyltransferase (mouse B3galt1)	1	C47F8.6	C47F8.6	C47F8.6	292	150	142	411	291	120	495	350	145	0	0.979	-0.0306192
1383	Member of the alcohol dehydrogenase protein family	5	C55A6.3	C55A6.3	C55A6.3	445	173	272	524	298	226	631	359	272	0	1	0
1384	Protein with moderate similarity to phosphatidylinositol 4-kinase type II (rat Pi4kii), which is a membrane-bound phosphatidylinositol kinase that may be involved in glucose transport and T cell activation	5	C56A3.8	C56A3.8	C56A3.8	777	188	589	892	320	572	1074	385	689	0	0.855	-0.226004
1385	Protein of unknown function, has moderate similarity to uncharacterized soluble liver antigen/liver pancreas antigen (human LOC51091)	5	D1054.13	D1054.13	D1054.13	330	154	176	376	300	76	453	361	92	0	1.913	0.935837
1386	Protein with high similarity to human PLRG1, which interacts with a nuclear protein kinase C-beta II isoenzyme that is involved in insulin signaling, contains seven WD domain (WD-40 repeat), which may mediate protein-protein interactions	5	D1054.15	D1054.15	D1054.15	1141	158	983	880	284	596	1060	342	718	0	1.369	0.453122
1387	Protein containing three WD domains (WD-40 repeat), which may mediate protein-protein interactions	2	D2013.3	D2013.3	D2013.3	359	235	124	399	258	141	480	310	170	0	0.729	-0.456009
1388	Protein with high similarity to mannosidase 1 alpha (mouse Man1a), which trims mannose residues and plays a role in misfolded protein degradation, member of the glycosyl hydrolase 47 family of alpha-mannosidases, which hydrolyze terminal mannose residues	1	D2030.1	D2030.1	D2030.1	978	257	721	997	234	763	1201	281	920	0	0.784	-0.351074
1389	Member of the alpha or beta hydrolase fold family, has moderate similarity to lysosomal acid lipase A (human LIPA), which deacylates cholesteryl and triacylglyceryl ester lipids and is associated with Wolman disease and cholesteryl ester storage disease	5	F54F3.3	F54F3.3	F54F3.3	745	209	536	764	185	579	920	222	698	0	0.768	-0.380822
1390	Protein containing a C3HC4 type (RING) zinc finger, has a region of weak similarity to a region of autocrine motility factor receptor (mouse Amfr), which is a cell surface glycoprotein involved in cell motility signaling and metastasis	5	F55A11.3	F55A11.3	F55A11.3	1200	179	1021	1073	150	923	1292	180	1112	0	0.918	-0.123434
1391	Member of the poly A polymerase family, which are nucleic acid independent RNA polymerases, has moderate similarity to uncharacterized human MtCCA	5	F55B12.4	F55B12.4	F55B12.4	721	161	560	808	145	663	973	174	799	0	0.701	-0.512514
1392	Protein with high similarity to C. elegans DPY-16, which is a collagen involved in epithelium morphogenesis, contains two collagen triple helix repeats, which are found in some extracellular proteins	5	F55C10.3	F55C10.3	F55C10.3	2773	156	2617	3077	148	2929	3707	178	3529	0	0.742	-0.430509
1393	Protein of unknown function, has strong similarity to C. elegans T12B3.B, has weak similarity to glycerophosphoryldiester phosphodiesterases	5	F55C5.2	F55C5.2	F55C5.2	231	168	63	491	176	315	591	212	379	0	0.166	-2.59074
1394	Protein of unknown function, has low similarity to uncharacterized signal recognition particle 68kD (human SRP68), which is a putative component of the signal recognition particle complex involved in targeting nascent proteins to the ER	5	F55C5.8	F55C5.8	F55C5.8	1072	175	897	972	178	794	1171	214	957	0	0.937	-0.093879
1395	Member of the matrixin family, contains three hemopexin domains, which may facilitate binding to various proteins and molecules, has low similarity to a region of matrix metalloproteinase 24 (human MMP24), which is associated with Alzheimer's disease	X	H36L18.1	H36L18.1	H36L18.1	256	149	107	253	171	82	304	206	98	0	1.092	0.126973
1396	Putative T-complex chaperonin, has strong similarity to T-complex chaperonins of human, D. melanogaster, S. cerevisiae, and C. elegans, member of the TCP-1/cpn60 chaperonin protein family	2	cct-4/K01C8.10	K01C8.10	K01C8.10	2227	154	2073	1896	209	1687	2284	251	2033	0	1.02	0.0285692
1397	Protein with strong similarity to C. elegans F02H6.2	4	K01G12.3	K01G12.3	K01G12.3	272	202	70	442	464	-22	532	559	-27	0
1398	Member of the transaminase protein family	X	ECA39/K02A4.1	K02A4.1	K02A4.1	1585	230	1355	2267	513	1754	2731	618	2113	0	0.641	-0.641604
1399	Putative isocitrate lyase	X	K02B9.1	K02B9.1	K02B9.1	526	261	265	558	518	40	672	624	48	0	5.521	2.46493
1400	Protein of unknown function, has strong similarity to C. elegans T05B4.11	X	K03A11.1	K03A11.1	K03A11.1	375	263	112	579	499	80	697	601	96	0	1.167	0.222805
1401	Protein of unknown function, has very strong similarity to uncharacterized C. elegans Y69E1A.A	5	T16A9.5	T16A9.5	T16A9.5	426	254	172	1435	520	915	1728	626	1102	0	0.156	-2.68038
1402	Protein of unknown function	3	T16G12.5	T16G12.5	T16G12.5	740	207	533	1022	475	547	1231	572	659	0	0.809	-0.305788
1403	Protein with moderate similarity to ]general transcription factor IIH polypeptide 2 (human GTF2H2), which is a subunit of general transcription initiation factor TFIIH involved in initiation and elongation and may be involved in Cockayne syndrome	3	T16H12.4	T16H12.4	T16H12.4	520	208	312	716	409	307	862	492	370	0	0.843	-0.246395
1404	Protein of unknown function	X	T18D3.6	T18D3.6	T18D3.6	595	213	382	1202	403	799	1448	485	963	0	0.397	-1.33279
1405	Protein of unknown function	5	T19B10.2	T19B10.2	T19B10.2	1205	143	1062	1105	330	775	1331	397	934	0	1.137	0.185232
1406	Protein containing a PDZ, DHR, or GLGF domain, which are found in signaling proteins	5	T19B10.5	T19B10.5	T19B10.5	562	184	378	681	341	340	820	410	410	0	0.922	-0.117161
1407	Protein of unknown function	2	T22C8.1	T22C8.1	T22C8.1	936	174	762	905	337	568	1090	406	684	-100	1.114	0.155749
1408	Protein of unknown function, has strong similarity to C. elegans E04F6.6	2	T22C8.6	T22C8.6	T22C8.6	390	149	241	524	317	207	631	381	250	0	0.964	-0.0528949
1409	Protein containing an F-box domain, which serve as a link between a target protein and a ubiquitin-conjugating enzyme	5	T22G5.3	T22G5.3	T22G5.3	841	146	695	948	316	632	1142	380	762	0	0.912	-0.132894
1410	Protein with moderate similarity to plasma membrane phospholipid scramblase 1 (human PLSCR1), which mediates Ca2+-dependent movement of membrane phospholipids in activated, injured, or apoptotic cells and may play a role in the DNA damage response	1	T22H2.5	T22H2.5	T22H2.5	518	158	360	673	349	324	810	420	390	0	0.923	-0.115597
1411	Protein containing a high mobility group box (HMG1 or 2) family domain, has a region of low similarity to a region of lymphoid enhancer-binding factor 1 (human LEF1), which is a transcriptional activator that also binds beta-catenin (human CTNNB1)	X	T22H6.6	T22H6.6	T22H6.6	543	156	387	915	353	562	1102	425	677	0	0.572	-0.805913
1412	Member of the 7-transmembrane chemoreceptor family of G-protein coupled receptors (GPCR), has moderate similarity to uncharacterized C. elegans C24B9.1	5	T23D5.2	T23D5.2	T23D5.2	409	164	245	719	326	393	866	392	474	0	0.517	-0.951764
1413	Member of the Sec1 family, which may be involved in secretion, has low similarity to vacuolar sorting protein 33a (rat Vps33a)	3	slp-1/B0303.9	B0303.9	B0303.9	959	175	784	994	291	703	1197	350	847	0	0.926	-0.110916
1414	Putative splicing regulator and member of the SWAP protein family	3	swp-1/CeSWAP/B0336.9	B0336.9	B0336.9	502	217	285	546	278	268	657	334	323	0	0.882	-0.181149
1415	Translation initiation factor eIF4E, binds to mRNA cap structure	5	ife-3/B0348.6	B0348.6	B0348.6	876	227	649	753	248	505	907	298	609	0	1.066	0.0922074
1416	Member of the histidine acid phosphatase protein family, which hydrolyze phosphate esters at low pH, has low similarity to lysosomal acid phosphatase (rat Acp2), which is a tartrate-inhibitable lysosomal enzyme	3	B0361.7	B0361.7	B0361.7	816	215	601	857	216	641	1032	260	772	0	0.778	-0.362158
1417	Putative ortholog of C. elegans B0404.3 gene product	X	B0403.3	B0403.3	B0403.3	240	200	40	198	197	1	238	237	1	0	40	5.32193
1418	Protein of unknown function, has low similarity to uncharacterized mouse Ltap	X	B0410.2	B0410.2	B0410.2	395	171	224	301	180	121	362	216	146	0	1.534	0.617298
1419	Putative ortholog of C. elegans C01G8.7 gene product	1	C01G8.9	C01G8.9	C01G8.7	550	163	387	588	181	407	708	218	490	0	0.79	-0.340075
1420	Protein containing a DUF40 domain of unknown function, which contain four conserved cysteines, and a DUF33 domain of unknown function, has high similarity to uncharacterized C. elegans R03H4.1	5	C02A12.2	C02A12.2	C02A12.2	202	159	43	199	181	18	239	218	21	0	2.048	1.03422
1421	Mitochondrial isovaleryl-CoA reductase; functions in leucine metabolism	4	IVD/C02B10.1	C02B10.1	C02B10.1	1836	172	1664	1779	195	1584	2143	234	1909	0	0.872	-0.1976
1422	Protein containing a tyrosinase central domain, which are copper-binding domains, has high similarity to uncharacterized C. elegans K08E3.1	3	C02C2.1/C02C2.2	C02C2.1	C02C2.1	2360	396	1964	1491	434	1057	1796	522	1274	0	1.542	0.624803
1423	Member of the E1-E2 (P-type) ATPase family and the haloacid dehalogenase or epoxide hydrolase family, contains cation transporting ATPase N-terminal and C-terminal domains, has moderate similarity to alpha subunit of non-gastric H,K ATPase (human ATP12A)	5	C02E7.1	C02E7.1	C02E7.1	366	362	4	440	501	-61	530	603	-73	0
1424	Protein of unknown function, has high similarity to uncharacterized C. elegans C02E7.4	5	C02E7.3	C02E7.3	C02E7.3	235	210	25	346	482	-136	416	580	-164	0
1425	Protein containing a Src homology 3 (SH3) domain, a ubiquitin interaction motif, and a VHS domain of unknown function, has low similarity to signal transducing adaptor molecule 1 (human STAM), which is involved in signal transduction	1	C34G6.7	C34G6.7	C34G6.7	1068	261	807	1354	498	856	1631	600	1031	0	0.783	-0.352916
1426	Protein of unknown function, has moderate similarity to uncharacterized C. elegans K11H12.4	4	C34H4.2	C34H4.2	C34H4.2	1770	264	1506	1358	475	883	1636	572	1064	0	1.415	0.500802
1427	Member of the rhodopsin family of G protein-coupled receptors (GPCR), has moderate similarity to uncharacterized C. elegans D1069.4	5	C35A11.1	C35A11.1	C35A11.1	390	225	165	545	464	81	656	559	97	0	1.701	0.766383
1428	Protein of unknown function	3	C35D10.7/C35D10.7A	C35D10.7	C35D10.7	679	213	466	780	384	396	939	462	477	0	0.977	-0.0335695
1429	Protein with strong similarity to C. elegans F42G2.6 gene product	1	C35E7.3	C35E7.3	C35E7.3	265	209	56	358	324	34	431	390	41	0	1.366	0.449957
1430	Protein with strong similarity to C. elegans C35E7.4 gene product	1	C35E7.5	C35E7.5	C35E7.5	1205	201	1004	977	256	721	1177	308	869	0	1.155	0.207893
1431	Protein containing three PDZ, DHR, or GLGF domains and three SAM (sterile alpha motif) domains, has low similarity to a region of neural tissue-specific F-actin binding protein (neurabin, rat LOC84685), which cross-links actin filaments	1	C43E11.6	C43E11.6	C43E11.6	1164	151	1013	1147	347	800	1381	418	963	0	1.052	0.0731347
1432	Protein of unknown function, has low similarity to uncharacterized C. elegans C26D10.5	2	C44B7.3	C44B7.3	C44B7.3	264	172	92	337	342	-5	406	412	-6	0
1433	Protein with high similarity to ATP-binding cassette subfamily D member 3 (human ABCD3), which mediates peroxisomal import of fatty acids and fatty acyl-CoAs and is associated with Zellweger syndrome, member of the ABC transporter family	2	C44B7.9	C44B7.9	C44B7.9	1233	157	1076	1440	332	1108	1734	400	1334	0	0.807	-0.309359
1434	Member of the M20, M25, or M40 peptidase family of zinc metalloproteases, has low similarity to uncharacterized C. elegans B0495.7	2	C44B7.11	C44B7.11	C44B7.11	343	157	186	384	323	61	462	389	73	0	2.548	1.34937
1435	Protein of unknown function, has high similarity to uncharacterized C. elegans C44C3.5	5	C44C3.1	C44C3.1	C44C3.1	178	142	36	213	293	-80	256	353	-97	0
1436	Protein of unknown function, has high similarity to uncharacterized C. elegans K12D9.5, which is predicted to be a G protein-coupled receptor	5	C44C3.6	C44C3.6	C44C3.6	256	134	122	324	319	5	390	384	6	0	20.333	4.34575
1437	Protein of unknown function	5	C14C10.3	C14C10.3	C14C10.3	1340	140	1200	1651	346	1305	1989	416	1573	0	0.763	-0.390245
1438	Protein containing 18 uncharacterized DUF139 cysteine repeat domains, has low similarity to uncharacterized C. elegans F07H5.8	5	C14C11.8	C14C11.8	C14C11.8	295	156	139	306	345	-39	368	415	-47	0
1439	Protein of unknown function	X	C14F11.4	C14F11.4	C14F11.4	405	160	245	656	326	330	790	392	398	0	0.616	-0.698998
1440	Putative coiled-coil protein, has similarity to myosins and human Golgi autoantigens	X	C14H10.2	C14H10.2	C14H10.2	1253	214	1039	1849	346	1503	2227	416	1811	0	0.574	-0.800877
1441	Protein of unknown function, has high similarity to uncharacterized C. elegans C15A11.7	1	C15A11.4	C15A11.4	C15A11.4	326	230	96	413	304	109	497	366	131	0	0.733	-0.448115
1442	Protein of unknown function, contains a putative transmembrane domain, has weak similarity to human vesicle trafficking and docking proteins syntaxin 6 and SNAP25 (synaptosomal-associated protein, 25kD) (Hs.157144, Hs.84389)	X	C15C7.1	C15C7.1	C15C7.1	488	216	272	524	256	268	631	308	323	0	0.842	-0.248108
1443	Protein with weak similarity to human sodium-dependent inorganic phosphate cotransporter NPT4, member of the major facilitator superfamily	2	C18D1.2	C18D1.2	C18D1.2	218	194	24	200	218	-18	240	262	-22	0
1444	Protein of unknown function, has strong similarity to uncharacterized C. elegans F31E9.6	5	C18D4.6	C18D4.6	C18D4.6	404	162	242	286	192	94	344	231	113	0	2.142	1.09896
1445	Protein of unknown function	1	C18E3.1	C18E3.1	C18E3.1	236	159	77	193	199	-6	232	239	-7	0
1446	Protein containing four EF hand domains, which are found in signaling, buffering or transport proteins, has a region of high similarity to calmodulin 1 (human CALM1), which is involved in regulating the calcium-dependent activity of proteins and enzymes	2	C18E9.1	C18E9.1	C18E9.1	1187	173	1014	1298	206	1092	1563	248	1315	0	0.771	-0.375197
1447	Protein containing four WSN domains of unknown function, four ankyrin (Ank) repeats, which may mediate protein-protein interactions, and four BRCA1 (breast cancer type 1) C terminus (BRCT) domains, which are found in some cell cycle checkpoint proteins	3	C18H2.1	C18H2.1	C18H2.1	241	228	13	231	332	-101	278	400	-122	0
1448	Protein of unknown function	4	C18H7.6	C18H7.6	C18H7.6	301	270	31	415	442	-27	500	532	-32	0
1449	Protein of unknown function	1	C55B7.5	C55B7.5	C55B7.5	1019	282	737	1216	506	710	1465	609	856	0	0.861	-0.215915
1450		1		multiple	C55B7.7	286	221	65	386	477	-91	465	574	-109	0
1451	Protein with moderate similarity to C. elegans F27C8.5 gene product	1	C55B7.11	C55B7.11	C55B7.11	480	197	283	662	432	230	797	520	277	0	1.022	0.0313952
1452	Protein of unknown function, has strong similarity over N-terminal 252 amino acids to C. elegans F23B2.7	4	C55C3.3	C55C3.3	C55C3.3	261	234	27	358	421	-63	431	507	-76	0
1453	Protein of unknown function containing a Ground-like domain, has weak similarity to C. elegans Y47D7A_146.B	5	C56A3.1	C56A3.1	C56A3.1	2364	246	2118	1577	366	1211	1900	440	1460	0	1.451	0.537048
1454	Protein of unknown function	5	C56A3.5	C56A3.5	C56A3.5	765	279	486	724	350	374	872	421	451	0	1.078	0.108357
1455		5		D1065.2	D1065.2	300	210	90	345	258	87	415	310	105	0	0.857	-0.222633
1456	Protein of unknown function	1	D1081.7	D1081.7	D1081.7	1069	243	826	754	244	510	908	293	615	0	1.343	0.425459
1457	Protein of unknown function, has moderate similarity to H. sapiens Hs.79672 gene product	3	D2007.5	D2007.5	D2007.5	1638	144	1494	2614	348	2266	3149	419	2730	0	0.547	-0.870387
1458	Protein containing four WD domains (WD-40 repeat), which may mediate protein-protein interactions, has low similarity to a region of SREBP cleavage-activating protein (human SCAP), which regulates cholesterol metabolism	2	scp-1/D2013.8	D2013.8	D2013.8	715	185	530	647	380	267	779	457	322	0	1.646	0.718964
1459	Protein containing a protein kinase domain, has low similarity to casein kinase 1 epsilon (human CSNK1E), which is a serine/threonine protein kinase that may function in DNA repair and is associated with familial advanced sleep phase syndrome	4	D2024.1	D2024.1	D2024.1	201	162	39	407	357	50	490	430	60	0	0.65	-0.621488
1460	Protein with high similarity to capping protein muscle Z-line alpha 1 (human CAPZA1), which regulates actin polymerization and may contribute to barbed-end actin capping and cell motility, member of the F-actin capping protein alpha subunit family	4	cap-1/D2024.6	D2024.6	D2024.6	1943	177	1766	1883	357	1526	2268	430	1838	0	0.961	-0.0573917
1461	Protein of unknown function	4	F15E6.9	F15E6.9	F15E6.9	354	188	166	411	343	68	495	413	82	0	2.024	1.01721
1462		5		F15E11.4	F15E11.4	231	156	75	288	332	-44	346	400	-54	0
1463		5		F15E11.11	F15E11.11	228	147	81	316	343	-27	380	413	-33	0
1464	Protein of unknown function, has moderate similarity to C. elegans D1005.5	5	F15H10.5	F15H10.5	F15H10.5	271	166	105	355	353	2	427	425	2	0	52.5	5.71425
1465	Voltage-gated potassium channel, has strong similarity to Drosophila ether-a-go-go (eag) potassium channel	5	egl-2/F16B3.1	F16B3.1	F16B3.1	297	165	132	343	360	-17	413	433	-20	0
1466	Protein of unknown function, has low similarity to uncharacterized C. elegans T07F8.1	5	F16B4.3	F16B4.3	F16B4.3	233	201	32	279	398	-119	336	479	-143	0
1467	Protein containing two protein kinase domains, has a region of low similarity to a region of mitogen activated protein kinase kinase kinase 3 (human MAP3K3), which activates the SAPK (MAPK8) and ERK (MAPK3) but not the p38 MAP kinase (MAPK14) pathway	4	F18F11.4	F18F11.4	F18F11.4	540	240	300	697	412	285	839	496	343	0	0.875	-0.192645
1468	Protein with moderate similarity to ubiquitin fusion degradation protein (S. cerevisiae Ufd1p), which is involved in degradation of ubiquitin fusion proteins	4	F19B6.2	F19B6.2	F19B6.2	1395	265	1130	1111	373	738	1338	449	889	0	1.271	0.345964
1469	Protein of unknown function	2	F19B10.1	F19B10.1	F19B10.1	396	212	184	388	296	92	467	356	111	0	1.658	0.729444
1470	Protein of unknown function, has weak similarity to C. elegans F19B10.11	2	F19B10.5	F19B10.5	F19B10.5	216	159	57	231	241	-10	278	290	-12	0
1471	Putative paralog of C. elegans K12B6.8 gene product	2	F19B10.10	F19B10.10	F19B10.10	516	175	341	348	262	86	419	315	104	0	3.279	1.71326
1472	Member of the carboxypeptidase protein family	4	F19C7.2	F19C7.2	F19C7.2	709	243	466	834	362	472	1004	436	568	0	0.82	-0.286304
1473	Protein of unknown function, has high similarity to uncharacterized C. elegans F35E12.6	5	F35E12.5	F35E12.5	F35E12.5	1550	267	1283	3307	546	2761	3984	657	3327	0	0.386	-1.37333
1474	Protein containing an F-box domain, which serve as a link between a target protein and a ubiquitin-conjugating enzyme, has low similarity to uncharacterized C. elegans F35E2.8	1	F35E2.2	F35E2.2	F35E2.2	221	203	18	477	475	2	574	572	2	0	9	3.16993
1475	Putative G protein-coupled receptor, member of a subfamily with distant similarity to members of the SRG subfamily, no homolog found in human or D. melanogaster	1	F35E2.6	F35E2.6	F35E2.6	235	198	37	397	454	-57	478	546	-68	0
1476	Protein containing six C2H2 type zinc finger domains, has a region of low similarity to a region of C. elegans HAM-2, which is a putative transcription factor required for hermaphrodite-specific neuron migration and a downstream target of C. elegans EGL-5	5	T05G11.1	T05G11.1	F35E8.14	300	191	109	361	361		434	434		0
1477	Member of an uncharacterized protein family	5	F35E8.7	F35E8.7	F35E8.7	194	173	21	277	298	-21	333	359	-26	0
1478	Protein of unknown function, has high similarity to uncharacterized C. elegans C17B7.5	5	F35F10.10	F35F10.10	F35F10.10	227	161	66	249	241	8	300	290	10	0	6.6	2.72247
1479	Protein containing four BRCA1 (breast cancer type 1) C terminus (BRCT) domains, two ankyrin (Ank) repeats, and two WSN domains of unknown function, has low similarity to uncharacterized C. elegans C01G10.1	3	F37A4.4	F37A4.4	F37A4.4	212	158	54	269	205	64	324	246	78	0	0.692	-0.531156
1480	Protein of unknown function	3	F37A4.6	F37A4.6	F37A4.6	331	182	149	327	201	126	393	242	151	0	0.987	-0.018878
1481	Protein with high similarity to human SMARCA1, which is part of a complex involved in histone assembly, contains two Myb-like DNA-binding domains, two AT-hook motifs, two SNF2 related N-terminal domains, and two helicase conserved C-terminal domains	3	F37A4.8	F37A4.8	F37A4.8	1034	190	844	790	201	589	951	242	709	0	1.19	0.250962
1482	Protein of unknown function, similar to C. elegans olfactory receptor ODR-10	5	F37B4.11	F37B4.11	F37B4.11	248	247	1	254	218	36	306	262	44	0	0.023	-5.44222
1483	Putative folate transporter, has strong similarity to human reduced folate carrier protein (RFC-like, Hs.173314)	5	F37B4.7	F37B4.7	F37B4.7	548	137	411	583	343	240	702	413	289	0	1.422	0.507921
1484	Member of the RNase PH family of 3' exoribonucleases, which are involved in RNA processing, has a region of low similarity to S. cerevisiae Rrp45p, which is a protein component of the exosome 3'-5' exoribonuclease complex	3	F37C12.13	F37C12.13	F37C12.13	1011	173	838	1069	361	708	1287	434	853	0	0.982	-0.0262051
1485	Putative paralog of C. elegans ZK250.9, has weak similarity at the C-terminus of S. cerevisiae PIF1, mitochondrial DNA repair and recombination protein	2	ZK250.10	ZK250.10	ZK250.10	244	143	101	241	327	-86	290	393	-103	0
1486	TcA transposase	m	ZK250.4	ZK250.4	ZK250.4	320	148	172	550	338	212	662	407	255	0	0.675	-0.567041
1487	Protein containing four meprin and TRAF homology (MATH) domains	2	ZK250.6	ZK250.6	ZK250.6	227	176	51	296	362	-66	356	436	-80	0
1488	Protein containing three meprin and TRAF homology (MATH) domains, has strong similarity to uncharacterized C. elegans C40D2.2	2	ZK250.8	ZK250.8	ZK250.8	1036	178	858	1684	364	1320	2028	438	1590	0	0.54	-0.888969
1489	Protein containing three ankyrin (Ank) repeats, has a region of moderate similarity to a region of BRCA1 associated RING domain 1 (mouse Bard1), which binds mouse Brca1 and may participate in tumor suppression	1	ZK265.1	ZK265.1	ZK265.1	272	155	117	408	358	50	491	431	60	0	1.95	0.963474
1490	Protein containing seven kunitz or bovine pancreatic trypsin inhibitor domains, has a region of moderate similarity to a region of alpha-1-microglobulin and bikunin precursor (human AMBP), which is a lipocalin transport protein	5	ZK287.4	ZK287.4	ZK287.4	208	143	65	308	352	-44	371	424	-53	0
1491	Protein with high similarity to C. elegans NHR-58, which is a putative nuclear hormone receptor-Zinc finger protein that is involved in embryogenesis and morphogenesis, contains a nuclear hormone receptor ligand-binding and C4-type zinc finger domains	5	nhr-90/ZK488.2	ZK488.2	ZK488.2	680	153	527	928	369	559	1118	444	674	0	0.782	-0.354759
1492	Protein containing a DUF138 domain of unknown function, has high similarity to uncharacterized C. elegans ZK488.5	5	ZK488.6	ZK488.6	ZK488.6	473	166	307	596	387	209	718	466	252	0	1.218	0.284514
1493	Protein with weak similarity to C. elegans C36B1.5, which is a putative U4/U6 snRNP-associated splicing factor and member of the WD repeat protein family	3	ZK520.3	ZK520.3	ZK520.3	288	207	81	380	415	-35	457	500	-43	0
1494		X		ZK54.2	ZK54.2	852	296	556	880	442	438	1060	532	528	0	1.053	0.0745054
1495	Putative coiled-coil protein, has weak similarity to S. cerevisiae spindle pole body component Nuf1p, has weak similarity to C. elegans myosin family member NMY-1	2	ZK546.14	ZK546.14	ZK546.14	2190	327	1863	2681	503	2178	3230	606	2624	0	0.71	-0.494109
1496	Protein containing four C2H2 type zinc finger domains, which bind nucleic acids	2	ZK546.5	ZK546.5	ZK546.5	742	212	530	937	373	564	1128	449	679	0	0.781	-0.356606
1497	Member of the 7-transmembrane chemoreceptor family of G-protein coupled receptors (GPCR), has low similarity to C. elegans ODR-10, which is involved in odorant response	5	T10H9.6	T10H9.6	T10H9.6	255	192	63	282	376	-94	339	453	-114	0
1498	Protein of unknown function, has high similarity to uncharacterized C. elegans T11A5.2	5	T11A5.3	T11A5.3	T11A5.3	268	236	32	365	452	-87	439	544	-105	0
1499	Protein containing two collagen triple helix repeats and one nematode cuticle collagen N-terminal domain, has moderate similarity to a region of C. elegans BLI-1, which is a putative collagen involved in embryogenesis and morphogenesis and chemotaxis	4	T11B7.3	T11B7.3	T11B7.3	3109	351	2758	3042	573	2469	3665	690	2975	0	0.927	-0.109359
1500	Vitellogenin receptor	4	rme-2/lr/T11F8.3	T11F8.3	T11F8.3	2913	340	2573	1775	538	1237	2138	648	1490	0	1.727	0.788268
1501	Member of the short-chain dehydrogenase-reductase family, which are NAD- or NADP-dependent oxidoreductases, has moderate similarity to short-chain dehydrogenase-reductase 1 (human SDR1), which reduces all-trans-retinal to retinol	5	T11F9.11	T11F9.11	T11F9.11	1296	250	1046	1501	425	1076	1808	512	1296	0	0.807	-0.309359
1502	Member of the ZIP zinc transporter family, which may be metal transporters	5	T11F9.2	T11F9.2	T11F9.2	433	208	225	447	316	131	538	380	158	0	1.424	0.509949
1503	Collagen of the collagen triple helix repeat (20 copies) family	2	dpy-2/rol-2/T14B4.6	T14B4.6	T14B4.6	1221	203	1018	938	259	679	1130	312	818	0	1.244	0.314986
1504	Putative serine-pyruvate aminotransferase	2	T14D7.1	T14D7.1	T14D7.1	1112	189	923	1011	232	779	1218	279	939	0	0.983	-0.0247367
1505	Member of the rhodopsin family of G-protein coupled receptors (GPCR), has a region of low similarity to dopamine D2 receptor (rat Drd2), which inhibits adenylyl cyclase, activates phospholipase D and is important in locomotory behavior	X	T14E8.3	T14E8.3	T14E8.3	329	158	171	374	194	180	450	233	217	0	0.788	-0.343732
1506	Protein of unknown function	X	T14F9.2	T14F9.2	T14F9.2	401	160	241	384	189	195	462	227	235	0	1.026	0.0370307
1507	DNA-binding protein involved in target gene activation in pharynx, vulva and hindgut morphogenesis	X	peb-1/T14F9.4	T14F9.4	T14F9.4	379	179	200	481	198	283	579	238	341	0	0.587	-0.768568
1508	Putative forkhead transcription factor; strongly similar to C. elegans C47G2.2; functions redundantly with PES-1	X	fkh-2/T14G12.4	T14G12.4	T14G12.4	262	176	86	254	187	67	306	225	81	0	1.062	0.0867838
1509	Protein containing a VHS domain of unknown function, has low similarity to golgi-associated gamma-adaptin ear containing ARF-binding protein 2 (VHS and EAR domains, human GGA2), which binds clathrin and may link cargo molecules to clathrin-coated vesicles	X	W04G3.4	W04G3.4	W04G3.4	307	132	175	459	335	124	553	403	150	0	1.167	0.222805
1510	Member of an uncharacterized protein family	1	W04G5.4	W04G5.4	W04G5.4	221	132	89	370	316	54	445	380	65	0	1.369	0.453122
1511	Protein of unknown function, putative paralog of C. elegans W04G5.8	1	W04G5.7	W04G5.7	W04G5.7	198	129	69	247	313	-66	297	377	-80	0
1512	Protein of unknown function	1	W05F2.6	W05F2.6	W05F2.6	812	136	676	847	335	512	1020	403	617	0	1.096	0.132248
1513	Protein containing two collagen triple helix repeats, which are found in some extracellular proteins, and a nematode cuticle collagen N-terminal domain, has high similarity to a region of C. elegans BLI-1	3	W05G11.3	W05G11.3	W05G11.3	2446	164	2282	2547	354	2193	3068	426	2642	0	0.864	-0.210897
1514	Phosphate permease	2	W05H5.3	W05H5.3	W05H5.3	331	167	164	537	360	177	646	433	213	0	0.77	-0.37707
1515	Membrane-associated protein involved in localization of odorant receptors to olfactory neuron cilia	3	odr-4/Y102E9.1	Y102E9.1	Y102E9.1	916	155	761	1041	354	687	1254	426	828	0	0.919	-0.121863
1516	Member of the transposase family, which are required for excising and inserting mobile genetic elements, has very strong similarity to uncharacterized C. elegans F44F4.8	4	Y116A8B.2	Y116A8B.2	Y116A8B.2	1061	150	911	1504	362	1142	1812	436	1376	0	0.662	-0.595097
1517	Protein of unknown function, has weak similarity to uncharacterized C. elegans R08C7.9	5	Y20C6A.2	Y20C6A.2	Y20C6A.2	356	148	208	603	380	223	726	457	269	0	0.773	-0.37146
1518	Member of the 7-transmembrane chemoreceptor family of G-protein coupled receptors (GPCR), has low similarity to uncharacterized C. elegans F39E9.3	5	Y22F5A.2	Y22F5A.2	Y22F5A.2	640	145	495	1178	384	794	1419	462	957	0	0.517	-0.951764
1519	Protein of unknown function	1	Y23H5A.3	Y23H5A.3	Y23H5A.3	1134	180	954	1104	406	698	1330	489	841	0	1.134	0.181421
1520	Protein of unknown function	X	Y26E6A.1	Y26E6A.1	Y26E6A.1	591	238	353	682	451	231	821	543	278	0	1.27	0.344828
1521	Protein with similarity to human trophinin (TRO, cell adhesion protein possibly involved in embryo implantation), putative paralog of C. elegans T28H11.5	4	K07F5.11	K07F5.11	K07F5.11	1035	292	743	2000	529	1471	2409	637	1772	0	0.419	-1.25498
1522	Protein with strong similarity to C. elegans K07F5.15 gene product	4	K07F5.14	K07F5.14	K07F5.14	1518	274	1244	2278	532	1746	2744	640	2104	0	0.591	-0.75877
1523	Putative tubulin-specific chaperone, has strong similarity to human TBCE (tubulin-specific chaperone E), has similarity to S. cerevisiae Pac2p	4	K07H8.1	K07H8.1	K07H8.1	600	199	401	838	454	384	1009	546	463	0	0.866	-0.207561
1524	Protein of unknown function, has moderate similarity to C. elegans F58D2.2	4	K07H8.5	K07H8.5	K07H8.5	324	211	113	672	453	219	809	545	264	0	0.428	-1.22432
1525	Protein containing a KH domain, which may bind RNA, has moderate similarity to a region of C. elegans GLD-1, which is an RNA binding protein that is required for transition from mitosis to meiosis during spermatogenesis and oogenesis in hermaphrodites	4	K07H8.9	K07H8.9	K07H8.9	1000	342	658	1230	479	751	1481	577	904	0	0.728	-0.45799
1526	CBF1 homolog and a potential transcriptional regulator of the LIN-12 and GLP-1 (Lag) pathways	4	lag-1/K08B4.1	K08B4.1	K08B4.1	1025	376	649	1139	454	685	1372	546	826	0	0.786	-0.347399
1527	Putative ortholog of C. elegans Y43F4A.2 gene product	X	K09E3.1	K09E3.1	K09E3.1	264	268	-4	277	332	-55	333	400	-67	0
1528	Protein of unknown function, has low similarity to uncharacterized C. elegans C08A9.6	X	K09E3.6	K09E3.6	K09E3.6	307	199	108	490	257	233	590	309	281	0	0.384	-1.38082
1529	Member of the sugar (and other) transporter family, has weak similarity to organic cation-carnitine transporter 3 (mouse Slc22a9), which is a a sodium and pH-independent organic cation and carnitine transporter that may be involved in spermatogenesis	X	K09E9.1	K09E9.1	K09E9.1	525	212	313	718	243	475	865	292	573	0	0.546	-0.873027
1530	Protein containing a DUF33 domain of unknown function, has high similarity to uncharacterized C. elegans K09E10.1	4	K09E10.2	K09E10.2	K09E10.2	331	212	119	570	233	337	686	280	406	0	0.293	-1.77103
1531	Putative ortholog of C. elegans C17B7.7 gene product	m	K09F6.2	K09F6.2	K09F6.2	421	179	242	577	190	387	695	228	467	0	0.518	-0.948976
1532	Protein of unknown function, has strong similarity to uncharacterized C. elegans F54H12.2	2	K09F6.5	K09F6.5	K09F6.5	353	174	179	401	181	220	483	218	265	0	0.675	-0.567041
1533	Protein containing two protein kinase domains, has high similarity to uncharacterized C. elegans B0198.3	X	mes-1/F54F7.5	F54F7.5	F54F7.5	413	171	242	519	188	331	625	226	399	0	0.607	-0.720232
1534	Protein of unknown function, has a region of low similarity to a region of S. cerevisiae Dot1p, which is involved in silencing at telomeres and other repressed loci and meiotic arrest checkpoint	X	F54F7.7	F54F7.7	F54F7.7	277	154	123	440	176	264	530	212	318	0	0.387	-1.36959
1535	Alpha integrin subunit; required for normal axonal migration and fasciculation and for normal morphogenesis of multiple tissues	3	ina-1/F54G8.3	F54G8.3	F54G8.3	821	137	684	1159	348	811	1396	419	977	0	0.7	-0.514573
1536	Protein with high similarity to aconitase 2 mitochondrial (aconitate hydratase, human ACO2), which converts citrate to cis-aconitate in the tricarboxylic acid cycle, member of the aconitate hydratase family, contains two aconitase C-terminal domains	3	F54H12.1	F54H12.1	F54H12.1	829	154	675	812	348	464	978	419	559	0	1.208	0.27262
1537	Protein of unknown function, has very strong similarity to uncharacterized C. elegans Y57G11C.18	m	F54H12.4	F54H12.4	F54H12.4	322	141	181	575	351	224	692	422	270	0	0.67	-0.577767
1538	Protein containing a protein kinase domain, has low similarity to casein kinase I (S. cerevisiae Yck1p)	2	F54H5.2	F54H5.2	F54H5.2	267	140	127	438	354	84	527	426	101	0	1.257	0.329985
1539	Protein containing six WD domains (WD-40 repeat), which may mediate protein-protein interactions, has a region of weak similarity to a region of C. albicans TUP1, which is a transcriptional repressor of genes involved in filamentous growth	1	F55F8.5	F55F8.5	F55F8.5	1292	190	1102	1587	390	1197	1912	469	1443	0	0.764	-0.388355
1540	Protein containing eight epidermal growth factor (EGF)-like domains, has weak similarity to C. elegans SPE-9, which is a transmembrane protein found in sperm and required for spermatogenesis	4	F55G1.13	F55G1.13	F55G1.13	440	180	260	759	384	375	914	462	452	0	0.575	-0.798366
1541	Protein of unknown function, has moderate similarity to H. sapiens Hs.115778 gene product	4	F55G1.4	F55G1.4	F55G1.4	409	152	257	478	354	124	575	426	149	0	1.725	0.786596
1542	Protein of unknown function, has moderate similarity to C. elegans F55A11.7	4	F55G1.6	F55G1.6	F55G1.6	604	157	447	805	368	437	969	443	526	0	0.85	-0.234465
1543	Member of the delta 1-pyrroline-5-carboxylate reductase (P5CR) family, which are involved in proline biosynthesis, has low similarity to pyrroline-5-carboxylate reductase 1 (human PYCR1), which catalyzes reduction of pyrroline-5-carboxylate to proline	4	F55G1.9	F55G1.9	F55G1.9	652	154	498	677	384	293	815	462	353	0	1.411	0.496718
1544	Protein containing nine epidermal growth factor-like, three sushi or short consensus repeat, low-density lipoprotein receptor class A, C-type lectin, and hyalin repeat domains, has a region of weak similarity to a region of mouse Notch2	1	F55H12.3	F55H12.3	F55H12.3	253	141	112	460	384	76	554	462	92	0	1.217	0.283329
1545	Protein of unknown function, has very strong similarity to uncharacterized C. elegans K02E7.2	m	R09E12.5	R09E12.5	R09E12.5	475	156	319	680	409	271	819	492	327	0	0.976	-0.0350469
1546	Protein with strong similarity to C. elegans C05D12.2 gene product	4	R09H10.5	R09H10.5	R09H10.5	1079	194	885	804	426	378	968	513	455	0	1.945	0.95977
1547	Protein containing a protein kinase domain, has weak similarity to S. cerevisiae Yck1p, which is a casein kinase I isoform	5	R10D12.10	R10D12.10	R10D12.10	246	199	47	456	446	10	549	537	12	0	3.917	1.96975
1548	Protein containing four RNA recognition motifs (RRM, RBD, or RNP), has low similarity to C. elegans RBP-1, which is a protein involved in oogenesis	3	R10E4.2	R10E4.2	R10E4.2	2301	239	2062	1893	510	1383	2280	614	1666	0	1.238	0.308011
1549	Member of the phosphate transporter family, has low similarity to amphotropic murine retrovirus receptor (solute carrier family 20 member 2, human SLC20A2), which is a sodium-dependent phosphate cotransporter that mediates inorganic phosphate transport	5	B0222.2	B0222.2	B0222.2	395	219	176	501	449	52	603	540	63	0	2.794	1.48233
1550	Protein containing two pyridoxal-dependent group II decarboxylase conserved domains, which bind pyridoxal-phosphate groups, has moderate similarity to sphingosine phosphate lyase 1 (mouse Sgpl1), which cleaves the C2-3 carbon of sphingosine phosphate	5	B0222.4	B0222.4	B0222.4	670	197	473	438	389	49	527	468	59	0	8.017	3.00306
1551	Protein containing two PAN domains, which may mediate protein-protein or protein-carbohydrate interactions	5	C16D9.1	C16D9.1	C16D9.1	631	239	392	569	363	206	685	437	248	0	1.581	0.660837
1552	Protein containing a DUF235 domain of unknown function, has high similarity to uncharacterized C. elegans C17A2.6	5	C16D9.3	C16D9.3	C16D9.3	239	242	-3	325	317	8	391	381	10	0
1553	Putative ortholog of C. elegans T22B11.2 gene product	5	C16D9.6	C16D9.6	C16D9.6	397	182	215	452	243	209	544	292	252	0	0.853	-0.229382
1554	Protein of unknown function, has low similarity to uncharacterized C. elegans B0563.6	X	C17H11.1	C17H11.1	C17H11.1	307	152	155	382	210	172	460	253	207	0	0.749	-0.416962
1555	Member of the reverse transcriptase protein family, which are RNA-dependent DNA polymerases, has high similarity to uncharacterized C. elegans R05F9.4	X	C17H11.3	C17H11.3	C17H11.3	206	151	55	242	190	52	291	228	63	0	0.873	-0.195946
1556	Protein containing a DUF40 domain of unknown function, which contain four conserved cysteines, has high similarity to uncharacterized C. elegans C18B10.2	5	C18B10.1	C18B10.1	C18B10.1	240	152	88	221	177	44	266	213	53	0	1.66	0.731183
1557	Collagen that is structurally similar to vertebrate type IX collagens	2	rol-8/col-6/ZK1290.3	ZK1290.3	ZK1290.3	3476	178	3298	2477	181	2296	2984	218	2766	0	1.192	0.253384
1558	Member of the aldo-keto reductase family, which include some related monomeric NADPH-dependent oxidoreductases, has low similarity to (mouse Akr1a4), which is an NADPH-dependent aldo-keto reductase that reduces carbonyl-containing substrates	2	ZK1290.5	ZK1290.5	ZK1290.5	1130	213	917	1438	197	1241	1732	237	1495	0	0.613	-0.706041
1559	Protein with strong similarity to C. elegans W02D9.4 gene product	X	ZK154.5	ZK154.5	ZK154.5	505	198	307	519	193	326	625	232	393	0	0.781	-0.356606
1560	Protein with similarity to human and D. melanogaster sodium-dependent inorganic phosphate cotransporters, member of the major facilitator superfamily	5	ZK682.2	ZK682.2	ZK682.2	855	178	677	719	184	535	866	221	645	0	1.05	0.0703893
1561	Member of the troponin family, which regulate calcium-induced muscle contraction, has high similarity to uncharacterized C. elegans T20B3.2	X	ZK721.2	ZK721.2	ZK721.2	3382	140	3242	3399	354	3045	4095	426	3669	0	0.884	-0.177882
1562	Protein of unknown function	5	ZK742.2	ZK742.2	ZK742.2	941	186	755	1350	384	966	1626	462	1164	0	0.649	-0.62371
1563	Protein containing a nuclear hormone receptor ligand-binding domain and a C4-type zinc finger domain, which bind DNA and may be involved in transcription regulation, has low similarity to hepatic nuclear factor 4 (mouse Hnf4)	3	nhr-10/B0280.8	B0280.8	B0280.8	664	160	504	1087	375	712	1309	451	858	0	0.587	-0.768568
1564	Protein containing a C3HC4 type Ring zinc finger, which may mediate protein-protein interactions, has high similarity to uncharacterized C. elegans ZK1240.5	2	B0281.8	B0281.8	B0281.8	484	135	349	757	371	386	912	446	466	0	0.749	-0.416962
1565	Protein containing a protein kinase domain, has a region of moderate similarity to cyclin-dependent kinase 9 (CDC2-related kinase, mouse Cdk9), which is a serine-threonine kinase expressed maximally during muscle and neural cell terminal differentiation	3	B0285.1	B0285.1	B0285.1	593	145	448	822	371	451	990	446	544	0	0.824	-0.279284
1566	Protein of unknown function	3	B0285.5	B0285.5	B0285.5	876	167	709	973	382	591	1172	460	712	0	0.996	-0.00578235
1567	Member of 1-(5-phosphoribosyl)-5-amino-4-imidazole-carboxylate (AIR) carboxylase and SAICAR (phosphoribosylaminoimidazole-succinocarboxamide) synthetase families, has high similarity to uncharacterized SAICAR synthetase and AIR carboxylase (rat Ade2h1)	2	B0286.3	B0286.3	B0286.3	1189	165	1024	1433	379	1054	1726	456	1270	0	0.806	-0.311148
1568	Protein containing a fork head domain, which are found in transcription factors involved in cell fate determination, has a region of moderate similarity to a region of forkhead box I1 (human FOXI1), which is a transcriptional activator	2	B0286.5	B0286.5	B0286.5	408	162	246	639	381	258	769	459	310	0	0.794	-0.332789
1569	Protein of unknown function, has low similarity to uncharacterized C. elegans K06H6.1	5	ZK1055.5	ZK1055.5	ZK1055.5	217	153	64	362	383	-21	436	461	-25	0
1570	Member of the carbon-nitrogen hydrolase family, which hydrolyze carbon-nitrogen bonds, has low similarity to uncharacterized S. pombe Spcc965.09p	3	ZK1058.6	ZK1058.6	ZK1058.6	651	151	500	671	398	273	808	479	329	0	1.52	0.604071
1571		2		multiple	ZK1067.4	429	154	275	436	414	22	525	498	27	0	10.185	3.34837
1572	Member of the domain of unknown function DUF13 family, has high similarity to uncharacterized C. elegans T15D6.8	X	ZK1086.3	ZK1086.3	ZK1086.3	637	166	471	583	421	162	702	507	195	0	2.415	1.27202
1573	Member of the tubulin-tyrosine ligase family	3	ZK1128.6	ZK1128.6	ZK1128.6	820	171	649	1040	434	606	1253	522	731	0	0.888	-0.171368
1574	Member of the 'chromo' (CHRromatin Organization MOdifier) Domain protein family	3	cec-1/ZK1236.2	ZK1236.2	ZK1236.2	1829	203	1626	2948	475	2473	3551	572	2979	0	0.546	-0.873027
1575	Protein containing a DUF141 domain of unknown function, has high similarity to uncharacterized C. elegans C17H12.8	4	C17H12.6	C17H12.6	C17H12.6	613	211	402	518	392	126	624	472	152	0	2.645	1.40327
1576	Member of the ZIP zinc transporter family, which may be metal transporters, has low similarity to uncharacterized C. elegans F30B5.7	2	C18A3.2	C18A3.2	C18A3.2	626	188	438	600	315	285	722	379	343	0	1.277	0.352759
1577	GTP-binding protein of the rab family (ras superfamily), component of a neuronal transmission pathway that affects pharyngeal pumping, body thrashing, and male mating	2	rab-3/C18A3.6	C18A3.6	C18A3.6	869	192	677	828	284	544	997	342	655	0	1.034	0.0482362
1578	Protein that acts as a male/hermaphrodite sex determination switch	X	xol-1/C18A11.5	C18A11.5	C18A11.5	240	174	66	236	224	12	284	269	15	0	4.4	2.1375
1579	Protein containing a DUF40 domain of unknown function, which contain four conserved cysteines, has high similarity to uncharacterized C. elegans C18B10.1	5	C18B10.2	C18B10.2	C18B10.2	222	156	66	229	189	40	275	227	48	0	1.375	0.459432
1580		5		C18B10.10	C18B10.10	200	136	64	196	157	39	236	189	47	0	1.362	0.445727
1581	Protein containing a GRAM domain, which are found in glucosyltransferases, myotubularins and other putative membrane-associated proteins, has low similarity to WW domain binding protein 2 (mouse Wbp2), which is a ligand involved in protein binding	2	D2013.6	D2013.6	D2013.6	459	135	324	538	159	379	648	191	457	0	0.709	-0.496142
1582	Protein of unknown function, has moderate similarity to uncharacterized C. elegans Y45F10A.3	4	D2024.2	D2024.2	D2024.2	382	147	235	623	169	454	750	203	547	0	0.43	-1.21759
1583	Member of the glycosyltransferase family 25 or LPS biosynthesis protein family, which are involved in lipopolysaccharide biosynthesis, has a region of moderate similarity to a region of cerebral cell adhesion molecule (human LOC51148)	3	D2045.9	D2045.9	D2045.9	367	183	184	326	188	138	392	226	166	0	1.108	0.147958
1584		2		D2062.10	D2062.11	1768	260	1508	912	211	701	1098	254	844	0	1.787	0.83754
1585	Member of the tetraspanin family, which contain an N-terminal transmembrane domain that is a signal sequence and membrane anchor	1	D2092.7	D2092.7	D2092.7	238	202	36	236	193	43	284	232	52	0	0.692	-0.531156
1586	Protein of unknown function, contains a coiled-coil region, has weak similarity to C. elegans ZC334.5, has weak similarity over the C-terminus to human REST (RE1-silencing transcription factor)	1	DY3.5	DY3.5	DY3.5	359	188	171	296	195	101	356	234	122	0	1.402	0.487486
1587	Protein with moderate similarity to C. elegans T24E12.9 gene product	X	C36C9.5	C36C9.5	F07G6.4	487	138	349	763	352	411	919	424	495	0	0.705	-0.504305
1588	Protein of unknown function, has high similarity to uncharacterized C. elegans Y49C4A.4	5	F07G11.8	F07G11.8	F07G11.8	185	146	39	302	361	-59	363	434	-71	0
1589	Protein with low similarity to polymerase epsilon 2 (human POLE2), which is an accessory subunit of DNA polymerase epsilon that binds the catalytic subunit and stabilizes the polymerase complex	4	F08B4.5	F08B4.5	F08B4.5	745	144	601	1053	371	682	1268	446	822	0	0.731	-0.452057
1590	Protein of unknown function, has low similarity to uncharacterized C. elegans F40G12.5	2	F08D12.7	F08D12.7	F08D12.7	836	141	695	953	376	577	1148	453	695	0	1	0
1591	Protein of unknown function	2	F13H8.6	F13H8.6	F13H8.6	380	136	244	701	361	340	844	434	410	0	0.595	-0.749038
1592	Protein containing a type I phosphodiesterase or nucleotide pyrophosphatase domain, has weak similarity to a region of rat Enpp1, which is an ectonucleotide pyrophosphatase-phosphodiesterase and a cell surface tumor and neural differentiation antigen	4	F13H10.5	F13H10.5	F13H10.5	479	139	340	490	356	134	590	428	162	0	2.099	1.0697
1593	Protein containing a cyclin N-terminal domain, has low similarity to cyclin C (human CCNC), which functions in transcription, cell-cell adhesion, and cell proliferation and may be associated with lymphoid malignancies	5	F43D2.1	F43D2.1	F43D2.1	1131	157	974	1179	377	802	1420	454	966	0	1.008	0.0114956
1594	Protein with high similarity to vesicle transport-related protein (rat RA410), which interacts with and positively regulates syntaxin 5 (rat Stx5a) as part of a complex, member of the Sec 1 family, which may be involved in secretion	3	F43D9.3	F43D9.3	F43D9.3	394	155	239	461	390	71	555	469	86	0	2.779	1.47457
1595	Member of the mitochondrial carrier protein family of membrane transporters, has low similarity to S. cerevisiae Leu5p, which is a mitochondrial carrier membrane transporter	1	F43G9.3	F43G9.3	F43G9.3	590	138	452	737	381	356	887	459	428	0	1.056	0.0786098
1596	Protein of unknown function	1	F43G9.8	F43G9.8	F43G9.8	198	142	56	327	408	-81	393	491	-98	0
1597	Protein of unknown function	X	F44A6.5	F44A6.5	F44A6.5	434	151	283	761	424	337	916	510	406	0	0.697	-0.520769
1598	Protein containing a cyclin N-terminal domain, has a region of low similarity to a region of cyclin T1 (human CCNT1), which is a regulatory subunit of the positive transcription elongation factor b and functions in transcription elongation	3	F44B9.4	F44B9.4	F44B9.4	488	156	332	668	428	240	804	515	289	0	1.149	0.200379
1599	Protein of unknown function, has high similarity to uncharacterized C. elegans F47B8.4	5	F47B8.3	F47B8.3	F47B8.3	986	158	828	1672	424	1248	2014	510	1504	0	0.551	-0.859876
1600	Protein containing a nuclear hormone receptor C4-type zinc finger domain, which bind DNA and may be involved in regulation of transcription, and a nuclear hormone receptor ligand-binding domain, has low similarity to C. elegans NHR-51	5	F47C10.4	F47C10.4	F47C10.4	246	165	81	363	386	-23	437	465	-28	0
1601	Member of the 7-transmembrane chemoreceptor family of G protein-coupled receptors (GPCR), has high similarity to uncharacterized C. elegans F47C12.10	4	F47C12.3	F47C12.3	F47C12.3	273	163	110	251	298	-47	302	359	-57	0
1602	Member of the 7-transmembrane chemoreceptor family of G protein-coupled receptors (GPCR), has high similarity to uncharacterized C. elegans F47C12.3	4	F47C12.10	F47C12.10	F47C12.10	205	159	46	185	249	-64	222	300	-78	0
1603	Protein containing a DUF32 domain of unknown function, has strong similarity to uncharacterized C. elegans F47D2.6	5	F47D2.5	F47D2.5	F47D2.5	237	149	88	230	186	44	277	224	53	0	1.66	0.731183
1604	Member of the rhodopsin family of G protein-coupled receptors (GPCR), has low similarity to C. elegans GAR-1, which is a g protein-linked acetylcholine receptor with three alternatively spliced forms	3	F47D12.1	F47D12.1	F47D12.1	562	143	419	540	173	367	650	208	442	0	0.948	-0.077041
1605	Protein containing a RhoGEF (GTPase exchange factor) domain and a Src homology 3 (SH3) domain, has low similarity to pak3 binding protein (mouse Arhgef7), which is a putative GTPase exchange factor for Rho GTPases that recruits Pak to focal complexes	X	K11E4.4	K11E4.4	K11E4.4	501	144	357	444	159	285	534	191	343	0	1.041	0.0579701
1606	Component of a levamisole-gated channel	X	acr-3/K11G12.7	K11G12.7	K11G12.7	309	132	177	415	140	275	500	168	332	0	0.533	-0.907793
1607	Putative ortholog of C. elegans K11H12.4 gene product	4	K11H12.3	K11H12.3	K11H12.3	246	131	115	223	139	84	268	167	101	0	1.139	0.187768
1608		5		no_gene	K12B6.7	363	135	228	508	149	359	612	179	433	0	0.527	-0.924125
1609	Protein of unknown function, has high similarity to uncharacterized C. elegans M7.8	4	M7.12	M7.12	M7.12	578	155	423	576	166	410	693	200	493	0	0.858	-0.22095
1610	Protein containing one CAP-Gly domain, which is predicted to be in an alpha-helical coiled-coil conformation	3	M01A8.2	M01A8.2	M01A8.2	1009	167	842	1119	168	951	1348	202	1146	0	0.735	-0.444184
1611	Protein of unknown function	3	M88.4	M88.4	M88.4	292	149	143	286	159	127	344	191	153	0	0.935	-0.0969617
1612	Member of the 4 TM potassium channel protein family	2	twk-14/M110.2	M110.2	M110.2	272	153	119	439	165	274	528	198	330	0	0.361	-1.46993
1613	Protein containing a von Willebrand factor (vWF) type A domain, has a region of moderate similarity to a region of cuticulin component (C. elegans CUT-1)	3	M142.2	M142.2	M142.2	416	131	285	668	347	321	804	418	386	0	0.738	-0.438307
1614	Protein of unknown function, has high similarity to uncharacterized C. elegans F36G9.3	X	M153.2	M153.2	M153.2	195	130	65	364	347	17	438	418	20	0	3.25	1.70044
1615	Protein of unknown function	2	M176.4	M176.4	M176.4	1025	134	891	1963	355	1608	2365	427	1938	0	0.46	-1.12029
1616	Protein containing six uncharacterized DUF139 cysteine repeat domains, has low similarity to uncharacterized C. elegans R09B5.5	2	M195.2	M195.2	M195.2	301	135	166	416	361	55	501	434	67	0	2.478	1.30918
1617	Protein with weak similarity to C. elegans T13A10.5	X	T18D3.1	T18D3.1	T18D3.1	503	132	371	791	357	434	953	430	523	0	0.709	-0.496142
1618	Protein with high similarity to zinc transporter 2 (rat Slc30a2), which transports zinc into vesicles and may protect cells from zinc toxicity by inducing zinc accumulation in a lysosomal or endosomal compartment, member of the cation efflux family	X	T18D3.3	T18D3.3	T18D3.3	568	128	440	642	352	290	773	424	349	0	1.261	0.334568
1619	Member of the C. elegans putative membrane protein family 8, has moderate similarity to a region of bestrophin (human VMD2), which functions in vision and may be associated with vitelliform macular dystrophy and bull's eye maculopathy	3	T19C3.1	T19C3.1	T19C3.1	345	136	209	424	366	58	510	440	70	0	2.986	1.57821
1620	Protein of unknown function, has high similarity to uncharacterized C. elegans C51F7.2	5	T19C4.3	T19C4.3	T19C4.3	177	139	38	299	390	-91	360	469	-109	0
1621	Protein with moderate similarity to C. elegans T27E9.9 gene product	X	T19D7.1	T19D7.1	T19D7.1	437	133	304	714	401	313	860	483	377	0	0.806	-0.311148
1622	Protein of unknown function	2	T19D12.7	T19D12.7	T19D12.7	242	127	115	406	406		489	489		0
1623	Putative coiled-coil protein, has weak similarity to S. cerevisiae Uso1p, required for protein transport from ER to Golgi	1	T22C1.6	T22C1.6	T22C1.6	989	134	855	1448	400	1048	1744	481	1263	0	0.677	-0.562772
1624	Protein containing two C2H2 type zinc finger domains, which bind nucleic acids, has moderate similarity to uncharacterized C. elegans T22C8.3	2	T22C8.4	T22C8.4	T22C8.4	237	142	95	383	366	17	461	440	21	0	4.524	2.1776
1625	Protein with high similarity to excitatory amino acid transporter 1 (human SLC1A3), which is a high affinity glutamate-aspartate transporter important for glutamate reuptake in excitatory neurotransmissions	X	T22E5.2	T22E5.2	T22E5.2	205	139	66	315	303	12	379	365	14	0	4.714	2.23695
1626	Member of the 7-transmembrane chemoreceptor family of G-protein coupled receptors (GPCR), has high similarity to uncharacterized C. elegans T22F3.5	5	T22F3.6	T22F3.6	T22F3.6	407	134	273	503	267	236	606	321	285	0	0.958	-0.0619024
1627	Member of the sugar (and other) transporter family, has weak similarity to solute carrier family 17 member 1 (mouse Slc17a1), which is involved in sodium-dependent phosphate transport and mediates hepatic and renal anion drug transport	5	T22F3.8	T22F3.8	T22F3.8	344	130	214	380	217	163	457	261	196	0	1.092	0.126973
1628	Member of the 7-transmembrane chemoreceptor family of G-protein coupled receptors (GPCR), has high similarity to uncharacterized C. elegans T22H2.1	1	T22H2.3	T22H2.3	T22H2.3	306	123	183	393	170	223	473	204	269	0	0.68	-0.556393
1629	Member of an uncharacterized protein family	5	F21D9.5	F21D9.5	F21D9.5	187	121	66	179	155	24	215	186	29	0	2.276	1.1865
1630	Member of the flavin containing amine oxidase family, has moderate similarity to uncharacterized C. elegans F55C5.6	5	F25C8.2	F25C8.2	F25C8.2	500	137	363	494	155	339	595	186	409	0	0.888	-0.171368
1631	Member of the AMP-binding enzyme family, has weak similarity to S. cerevisiae Fat2p, which is a peroxisomal AMP-binding protein	5	F25C8.4	F25C8.4	F25C8.4	661	155	506	547	157	390	659	189	470	0	1.077	0.107018
1632	G protein-coupled receptor of unknown function, no homolog found in human or D. melanogaster	5	F26D2.9	F26D2.9	F26D2.9	196	135	61	169	140	29	203	168	35	0	1.743	0.801573
1633	Member of an uncharacterized protein family	5	F26D2.13	F26D2.13	F26D2.13	202	118	84	215	131	84	259	157	102	0	0.824	-0.279284
1634	Member of the short-chain dehydrogenase-reductase family, which are NAD- or NADP-dependent oxidoreductases, has low similarity to human HSA250303, which is a peroxisomal trans 2-enoyl CoA reductase that catalyzes the reduction of trans 2-enoyl CoAs	5	F26D2.15	F26D2.15	F26D2.15	318	119	199	403	133	270	485	160	325	0	0.612	-0.708396
1635	Member of an uncharacterized protein family	5	F47H4.4	F47H4.4	F47H4.4	326	132	194	543	148	395	654	178	476	0	0.408	-1.29336
1636	Member of the 7-transmembrane chemoreceptor family of G protein-coupled receptors (GPCR), has high similarity to uncharacterized C. elegans F21H7.11	5	F49H6.4	F49H6.4	F49H6.4	240	141	99	236	151	85	284	181	103	0	0.961	-0.0573917
1637	Protein containing a DUF216 domain of unknown function, has high similarity to uncharacterized C. elegans Y102A5C.33	5	F49H6.11	F49H6.11	F49H6.11	205	142	63	288	149	139	346	179	167	0	0.377	-1.40736
1638	Member of an uncharacterized protein family	4	F52B11.3	F52B11.3	F52B11.3	912	180	732	812	178	634	978	214	764	0	0.958	-0.0619024
1639	Protein containing two GATA-type zinc finger domains, has moderate similarity to C. elegans EGL-18, which is required for establishing the identity of hypodermal seam cells	4	elt-6/F52C12.5	F52C12.5	F52C12.5	501	130	371	444	343	101	534	413	121	0	3.066	1.61636
1640	Protein containing a protein kinase domain, has low similarity to casein kinase 1 delta (human CSNK1D), which is a serine/threonine protein kinase involved in DNA repair and found in neurofibrillary tangles of some neurodegenerative diseases	2	F53C3.1	F53C3.1	F53C3.1	202	136	66	369	351	18	444	422	22	0	3	1.58496
1641	Protein of unknown function, has low similarity to a region of immunoglobulin mu binding protein 2 (human IGHMBP2), which is a DNA binding protein that functions as a transcriptional regulator and may be involved in viral defense mechanisms	1	Y106G6D.5	Y106G6D.5	Y106G6D.5	575	134	441	648	358	290	780	431	349	0	1.264	0.337996
1642	TcA transposase	1	ZC334.4	ZC334.4	ZC334.4	301	137	164	568	364	204	684	438	246	0	0.667	-0.584241
1643	Two cadherin isoforms; HMR-1A required for epithelial morphogenesis and HMR-1B required for axonal guidance	1	hmr-1/ZK39.1/Y52B11B.2/W02B9.1	ZK39.1	ZK39.1	187	127	60	315	357	-42	379	430	-51	0
1644	Member of the Tc3 Transposase protein family	5	ZK262.5	ZK262.5	ZK262.5	432	126	306	561	358	203	675	431	244	0	1.254	0.326537
1645	Member of the 7-transmembrane chemoreceptor family of G-protein coupled receptors (GPCR), has high similarity to uncharacterized C. elegans ZK262.1	5	ZK262.11	ZK262.11	ZK262.11	204	131	73	373	376	-3	449	453	-4	0
1646	Member of an uncharacterized protein family	1	ZK1025.4	ZK1025.4	ZK1025.4	187	129	58	336	382	-46	404	460	-56	0
1647	Protein of unknown function	1	K05C4.7	K05C4.7	K05C4.7	803	140	663	865	356	509	1042	428	614	0	1.08	0.111031
1648	Protein containing a DUF138 domain of unknown function, has moderate similarity to uncharacterized C. elegans T06A1.1	5	K08D9.2	K08D9.2	K08D9.2	254	141	113	410	327	83	493	393	100	0	1.13	0.176323
1649	Member of the short-chain dehydrogenase-reductase family, which are NAD- or NADP-dependent oxidoreductases, has low similarity to short-chain dehydrogenase-reductase 1 (human SDR1), which catalyzes the reduction of all-trans-retinal to retinol	1	T05F1.10	T05F1.10	T05F1.10	370	132	238	748	282	466	901	339	562	0	0.423	-1.24127
1650	Putative coiled-coil protein, has similarity to S. cerevisiae Zip1p, a structural protein of the synaptonemal complex	1	T05F1.7	T05F1.7	T05F1.7	246	136	110	355	230	125	427	277	150	0	0.733	-0.448115
1651	Protein containing a DUF38 domain of unknown function and an F-box domain, which serve as a link between a target protein and a ubiquitin-conjugating enzyme, has low similarity to C. elegans FOG-2, which is required for the sexual identity of germ cells	5	T09F5.11	T09F5.11	T09F5.11	188	134	54	280	213	67	337	256	81	0	0.667	-0.584241
1652	Member of the 7-transmembrane chemoreceptor family of G-protein coupled receptors (GPCR), has high similarity to uncharacterized C. elegans ZC204.5	2	T10D4.5	T10D4.5	T10D4.5	199	138	61	226	202	24	272	243	29	0	2.103	1.07245
1653		2		F41G3.10	F41G3.10	617	140	477	887	179	708	1068	215	853	0	0.559	-0.83908
1654	Protein of unknown function, has high similarity to uncharacterized C. elegans R13D11.1	5	F41H8.2	F41H8.2	F41H8.2	180	131	49	179	150	29	215	180	35	0	1.4	0.485427
1655	Protein with strong similarity to heterogeneous nuclear ribonucleoprotein (hnRNP) proteins, contains RNA recognition motif (RRM) domains	4	rbp-1/F42A6.7/CehnRNPA1/hrp-1	F42A6.7	F42A6.7	4290	142	4148	2557	148	2409	3080	178	2902	0	1.429	0.515006
1656	Protein of unknown function, has low similarity to uncharacterized C. elegans C35A5.7	X	F42D1.3	F42D1.3	F42D1.3	302	158	144	312	154	158	375	185	190	0	0.758	-0.39973
1657	Mitogen-activated protein kinase that may be involved in response to osmotic and other cellular stresses	4	pmk-2/F42G8.3	F42G8.3	F42G8.3	612	170	442	658	156	502	792	187	605	0	0.731	-0.452057
1658	Protein with moderate similarity to solute carrier family 35 member 3 (UDP-N-acetylglucosamine(UDP-GlcNAc) transporter, human SLC35A3), which transports nucleotide sugars	5	F44C8.7	F44C8.7	F44C8.7	271	146	125	270	148	122	325	178	147	0	0.85	-0.234465
1659					F56F11.3	571	134	437	803	144	659	967	173	794	0	0.55	-0.862496
1660	Protein of unknown function	3	F57B9.9	F57B9.9	F57B9.9	575	139	436	702	142	560	845	171	674	0	0.647	-0.628162
1661	Member of the C. elegans Sre G protein-coupled chemoreceptor family, which are putative chemosensory receptors, has high similarity to uncharacterized C. elegans F57G9.2	2	F57G9.1	F57G9.1	F57G9.1	308	135	173	340	140	200	409	168	241	0	0.718	-0.477944
1662	Member of the rhodopsin family of G protein-coupled receptors (GPCR), has a region of weak similarity to a region of growth hormone secretagogue receptor (rat Ghsr), which binds ghrelin (rat LOC59301) and regulates growth hormone release	4	F57H12.4	F57H12.4	F57H12.4	280	126	154	479	137	342	577	165	412	0	0.374	-1.41889
1663	Member of the lipase class 3 family, which are a subset of lipolytic enzymes that hydrolyze ester linkages of triglycerides, has high similarity to uncharacterized C. elegans T10B5.7	3	F58B6.1	F58B6.1	F58B6.1	295	131	164	580	144	436	698	173	525	0	0.312	-1.68038
1664	Protein of unknown function, has strong similarity to C. elegans K07G6.A	2	F58E1.7	F58E1.7	F58E1.7	296	167	129	409	173	236	492	208	284	0	0.454	-1.13924
1665	Member of the lipase class 3 family, which are a subset of lipolytic enzymes that hydrolyze ester linkages of triglycerides	X	C14E2.6	C14E2.6	C14E2.6	204	147	57	270	364	-94	325	438	-113	0
1666	Protein of unknown function, has moderate similarity to uncharacterized C. elegans Y67A6A.1	1	C15A11.2	C15A11.2	C15A11.2	311	147	164	501	366	135	603	440	163	0	1.006	0.00863031
1667	Protein of unknown function	X	C15B12.3	C15B12.3	C15B12.3	187	145	42	264	378	-114	318	455	-137	0
1668	Protein of unknown function	X	C15C7.4	C15C7.4	C15C7.4	491	141	350	623	375	248	750	451	299	0	1.171	0.227741
1669	Protein of unknown function, has low similarity to a region of peroxisomal biogenesis factor 3 (peroxin 3, rat Pex3), which is an integral peroxisomal membrane protein required for peroxisome biogenesis	X	C15H9.8	C15H9.8	C15H9.8	395	135	260	774	385	389	932	463	469	0	0.554	-0.852042
1670	Protein of unknown function, has high similarity to uncharacterized C. elegans F32B6.4	2	C16A11.7	C16A11.7	C16A11.7	249	129	120	542	382	160	653	460	193	0	0.622	-0.685014
1671	Protein of unknown function	1	C17H1.2	C17H1.2	C17H1.2	187	132	55	405	376	29	487	453	34	0	1.618	0.694212
1672	Protein of unknown function	X	C17H11.5	C17H11.5	C17H11.5	276	133	143	492	304	188	592	366	226	0	0.633	-0.659723
1673	Protein of unknown function	X	C18A11.2	C18A11.2	C18A11.2	1068	137	931	887	256	631	1068	308	760	0	1.225	0.292782
1674	Protein containing a DUF40 domain of unknown function, which contain four conserved cysteines, has high similarity to uncharacterized C. elegans C04E12.1	5	C18B10.3	C18B10.3	C18B10.3	171	138	33	188	220	-32	226	265	-39	0
1675	Protein of unknown function	3	C18D11.3	C18D11.3	C18D11.3	600	135	465	790	193	597	951	232	719	0	0.647	-0.628162
1676	Protein of unknown function	1	C18E3.4	C18E3.4	C18E3.4	230	132	98	309	174	135	372	209	163	0	0.601	-0.734563
1677	Protein containing a C-type lectin domain, which mediate calcium-dependent carbohydrate recognition, has high similarity to uncharacterized C. elegans F49H6.1	5	F49H6.2	F49H6.2	F49H6.2	407	133	274	587	180	407	707	216	491	0	0.558	-0.841663
1678	Protein of unknown function, has moderate similarity to uncharacterized C. elegans Y41C4A.13	1	F52A8.1	F52A8.1	F52A8.1	801	162	639	1050	189	861	1265	227	1038	0	0.616	-0.698998
1679	Member of the ribosomal protein L25 protein family	1	F52B5.6	F52B5.6	F52B5.6	2647	173	2474	2973	179	2794	3581	215	3366	0	0.735	-0.444184
1680	Protein with strong similarity to C. elegans F52C6.3 gene product	2	F52C6.2	F52C6.2	F52C6.2	1774	162	1612	1123	150	973	1353	180	1173	-100	1.374	0.458382
1681	Protein of unknown function, putative paralog of C. elegans C36C9.1	X	F52D2.4	F52D2.4	F52D2.4	768	193	575	580	159	421	698	191	507	0	1.134	0.181421
1682	Member of the Hsp20 or alpha crystallin family, has low similarity to alpha-B crystallin (mouse Cryab), which functions as a molecular chaperone and modulates components of cell remodeling and apoptosis	5	F52E1.7/hsp17.5	F52E1.7	F52E1.7	581	179	402	686	162	524	826	195	631	0	0.637	-0.650635
1683	Protein of unknown function	X	F54B11.9	F54B11.9	F54B11.9	267	166	101	422	161	261	508	193	315	0	0.321	-1.63935
1684	Protein containing four EF hand domains, has moderate similarity to calmodulin 1 (human CALM1), which regulates the calcium-dependent activity of proteins and enzymes including ion channels, kinases, phosphatases, and phosphodiesterases	1	tnc-1/pat-10/F54C1.7	F54C1.7	F54C1.7	4327	182	4145	4796	179	4617	5778	215	5563	0	0.745	-0.424688
1685	Protein with high similarity to suppressor of Ty (S.cerevisiae) 4 homolog 1 (human SUPT4H1), which is part of the DRB sensitivity inducing factor that binds RNA Pol II, regulates transcription elongation, and may modulate chromatin assembly and activity	3	F54C4.2	F54C4.2	F54C4.2	983	202	781	1369	190	1179	1649	228	1421	0	0.55	-0.862496
1686	Member of the Skp1 family, has a region of low similarity to a region of S. cerevisiae Skp1p, which is a component (subunit D) of Cbf3 kinetochore and SCF (Skp1p-cullin-F-box) complexes and is involved in ubiquitin-dependent degradation	2	skr-15/F54D10.1	F54D10.1	F54D10.1	546	175	371	486	159	327	585	191	394	0	0.942	-0.086201
1687	Protein with moderate similarity to C. elegans F54D12.7 gene product	2	F54D12.2	F54D12.2	F54D12.2	206	141	65	213	138	75	256	166	90	0	0.722	-0.469929
1688	Protein of unknown function, has high similarity to uncharacterized C. elegans T09F5.7	3	F54D8.5	F54D8.5	F54D8.5	198	127	71	234	141	93	281	169	112	0	0.634	-0.657445
1689	Protein of unknown function, has moderate similarity to uncharacterized C. elegans T02H6.9	2	Y54E2A.9	Y54E2A.9	Y54E2A.9	281	125	156	490	144	346	590	173	417	0	0.374	-1.41889
1690		2		multiple	Y57A10C.1	219	128	91	268	149	119	322	179	143	0	0.636	-0.652901
1691	Member of the ADP-ribosylation factor (ARF) family, has low similarity to human ARF1, which is a GTP-binding protein that regulates the binding of coat protein complex proteins to endosomes	4	Y57G11C.13	Y57G11C.13	Y57G11C.13	1170	160	1010	894	346	548	1077	416	661	0	1.528	0.611645
1692	Protein of unknown function	2	Y57G7A.2	Y57G7A.2	Y57G7A.2	307	162	145	526	384	142	633	462	171	0	0.848	-0.237864
1693	Member of the transthyretin-like family, has high similarity to uncharacterized C. elegans Y5F2A.2	4	Y5F2A.1	Y5F2A.1	Y5F2A.1	2843	154	2689	4532	399	4133	5460	480	4980	0	0.54	-0.888969
1694	Protein of unknown function	X	Y62H9A.2	Y62H9A.2	Y62H9A.2	193	141	52	405	388	17	487	467	20	0	2.6	1.37851
1695	Protein of unknown function, has weak similarity to C. elegans Y37D8A.19	X	ZC373.2	ZC373.2	ZC373.2	828	139	689	1505	398	1107	1813	479	1334	0	0.516	-0.954557
1696	Protein of unknown function	3	ZC395.5	ZC395.5	ZC395.5	1430	133	1297	4776	392	4384	5754	472	5282	0	0.246	-2.02327
1697	Protein of unknown function, has weak similarity to C. elegans ZC412.7	5	ZC412.6	ZC412.6	ZC412.6	259	137	122	930	316	614	1120	380	740	0	0.165	-2.59946
1698	Member of the ribosomal protein S7 protein family	1	rps-7/ZC434.2	ZC434.2	ZC434.2	3153	141	3012	3560	213	3347	4289	256	4033	0	0.747	-0.42082
1699	Protein of unknown function	X	ZC449.4	ZC449.4	ZC449.4	310	135	175	482	182	300	580	219	361	0	0.485	-1.04394
1700	Protein of unknown function, has very strong similarity to uncharacterized C. elegans T28H11.7	4	ZC477.7	ZC477.7	ZC477.7	209	131	78	654	163	491	787	196	591	0	0.132	-2.92139
1701		2		K02617-1.F09C12	F09C12.7	315	135	180	1864	160	1704	2245	192	2053	0	0.088	-3.50635
1702		5		multiple	F09C6.10	349	133	216	342	156	186	412	187	225	0	0.96	-0.0588937
1703	Protein of unknown function	X	F09E10.1	F09E10.1	F09E10.1	497	137	360	591	157	434	712	189	523	0	0.688	-0.53952
1704	Member of an uncharacterized protein family	5	F19F10.3	F19F10.3	F19F10.3	289	162	127	246	176	70	296	212	84	0	1.512	0.596458
1705	Protein of unknown function	5	F19F10.8	F19F10.8	F19F10.8	720	177	543	984	179	805	1185	215	970	0	0.56	-0.836501
1706	Protein of unknown function	X	F19G12.4	F19G12.4	F19G12.4	464	162	302	440	153	287	530	184	346	0	0.873	-0.195946
1707		X		multiple	F23A7.1	375	165	210	243	150	93	292	180	112	0	1.875	0.906891
1708	Protein of unknown function	5	F23B12.4	F23B12.4	F23B12.4	744	186	558	748	168	580	901	202	699	0	0.798	-0.325539
1709	Member of the RRM domain protein family	4	F23B2.6	F23B2.6	F23B2.6	2051	212	1839	1785	196	1589	2150	236	1914	0	0.961	-0.0573917
1710	Protein of unknown function, has strong similarity to C. elegans F58E10.7	X	F23D12.3	F23D12.3	F23D12.3	270	260	10	304	246	58	366	296	70	0	0.143	-2.80591
1711	Protein of unknown function	2	F23F1.7	F23F1.7	F23F1.7	757	231	526	681	208	473	820	250	570	0	0.923	-0.115597
1712	Small protein with similarity to organic cation transporters	3	F23F12.3	F23F12.3	F23F12.3	239	176	63	232	155	77	279	186	93	0	0.677	-0.562772
1713	Protein of unknown function	1	T20F5.1	T20F5.1	T20F5.1	327	147	180	383	139	244	461	167	294	0	0.612	-0.708396
1714	Protein of unknown function	1	T20F5.5	T20F5.5	T20F5.5	235	137	98	336	147	189	404	177	227	0	0.432	-1.2109
1715	Protein of unknown function, has strong similarity to uncharacterized C. elegans T20G5.8	3	T20G5.7	T20G5.7	T20G5.7	646	137	509	997	155	842	1201	186	1015	0	0.501	-0.997117
1716	Protein of unknown function, has weak similarity to C. elegans E04D5.1	3	T20G5.9	T20G5.9	T20G5.9	320	138	182	415	164	251	500	197	303	0	0.601	-0.734563
1717	Protein of unknown function	X	T21B6.4	T21B6.4	T21B6.4	184	132	52	145	168	-23	174	202	-28	0
1718	Protein with strong similarity to C. elegans T21C9.13 gene product	5	T21C9.11	T21C9.11	T21C9.11	217	138	79	205	240	-35	246	289	-43	0
1719	Protein with high similarity to A. niger SrgA, which is a putative GTPase with a role in secretion, member of the Ras superfamily of GTP binding proteins	1	T23H2.5	T23H2.5	T23H2.5	1975	144	1831	3217	377	2840	3875	454	3421	0	0.535	-0.902389
1720	Protein containing two DUF40 domains of unknown function, which contain four conserved cysteines, has high similarity to uncharacterized C. elegans T24A6.13	5	T24A6.12	T24A6.12	T24A6.12	422	140	282	849	390	459	1022	469	553	0	0.51	-0.971431
1721	Protein with moderate similarity to C. elegans F40C5.2 gene product	m	T24A6.17	T24A6.17	T24A6.17	417	139	278	921	393	528	1109	473	636	0	0.437	-1.19429
1722	Protein of unknown function, has weak similarity to C. elegans F49F1.7	2	T24B8.5	T24B8.5	T24B8.5	1608	140	1468	861	371	490	1037	446	591	0	2.484	1.31267
1723	Protein of unknown function, has weak similarity to C. elegans F43C11_37.B and T01C3.9	X	T24C2.2	T24C2.2	T24C2.2	287	135	152	282	200	82	339	240	99	0	1.535	0.618239
1724	Protein with very strong similarity to C. elegans MED-1, which is a GATA-type transcription factor, contains a GATA-type zinc finger domain	X	T24D3.1	T24D3.1	T24D3.1	268	135	133	241	168	73	290	202	88	0	1.511	0.595504
1725	Protein containing a trypsin inhibitor-like cysteine rich domain	5	C04E6.12	C04E6.12	C04E6.12	310	137	173	248	150	98	298	180	118	0	1.466	0.551885
1726	Member of the transthyretin-like family	4	C04G2.1	C04G2.1	C04G2.1	567	138	429	557	143	414	671	172	499	0	0.86	-0.217591
1727	Putative FMRF-amide neurotransmitter	X	flp-12/C05E11.8	C05E11.8	C05E11.8	889	143	746	987	145	842	1189	174	1015	0	0.735	-0.444184
1728	Protein of unknown function	3	C05H8.2	C05H8.2	C05H8.2	352	137	215	255	142	113	307	171	136	0	1.581	0.660837
1729	Member of the 7-transmembrane chemoreceptor family of G protein-coupled receptors (GPCR), has low similarity to uncharacterized C. elegans W02H5.6	2	C06A8.7	C06A8.7	C06A8.7	281	137	144	298	137	161	359	165	194	0	0.742	-0.430509
1730	Protein containing a UBA (ubiquitin associated) or TS-N domain, has low similarity to uncharacterized C. elegans F40G9.3	X	C06E2.7	C06E2.7	C06E2.7	300	142	158	305	139	166	367	167	200	0	0.79	-0.340075
1731	Protein of unknown function	1	C15C6.1	C15C6.1	C15C6.1	419	166	253	347	152	195	418	183	235	0	1.077	0.107018
1732	Protein of unknown function	X	C15C7.5	C15C7.5	C15C7.5	1872	173	1699	1586	160	1426	1910	192	1718	0	0.989	-0.0159576
1733	Protein of unknown function, has weak similarity to uncharacterized C. elegans C31E10.6	2	C16A11.2	C16A11.2	9C16A11.2	809	165	644	724	160	564	872	192	680	0	0.947	-0.0785637
1734	Protein with similarity to mouse LYAR protein, a cell growth regulating nucleolar protein	3	C16C10.8	C16C10.8	8C16C10.8	1862	202	1660	1854	184	1670	2233	221	2012	0	0.825	-0.277534
1735	Protein containing a DUF19 domain of unknown function, which contain twelve conserved cysteines, has strong similarity to uncharacterized C. elegans T28A11.18	5	C17B7.9	C17B7.9	C17B7.9	421	230	191	505	217	288	608	261	347	0	0.55	-0.862496
1736	Protein of unknown function	1	C17D12.5	C17D12.5	C17D12.5	205	170	35	232	165	67	279	198	81	0	0.432	-1.2109
1737	Protein of unknown function	1	F28B3.4	F28B3.4	F28B3.4	357	162	195	402	153	249	484	184	300	0	0.65	-0.621488
1738	Protein of unknown function	4	F28D1.6	F28D1.6	F28D1.6	388	158	230	386	144	242	465	173	292	0	0.788	-0.343732
1739	Protein of unknown function	5	F32D1.8	F32D1.8	F32D1.8	571	152	419	634	142	492	763	171	592	0	0.708	-0.498179
1740	Protein containing AADGAPLIRF-amide neuromodulator	4	flp-13/FaRP_II/F33D4.3	F33D4.3	F33D4.3	645	156	489	489	159	330	589	191	398	0	1.229	0.297485
1741	Protein with similarity to serine protease inhibitor-like proteins, has strong similarity to C. elegans F35B12.4	5	F35B12.6	F35B12.6	F35B12.6	423	164	259	541	173	368	651	208	443	0	0.585	-0.773491
1742	Protein containing a DB module domain, has high similarity to uncharacterized C. elegans C42D4.3	X	F35B3.4	F35B3.4	F35B3.4	619	168	451	676	189	487	814	227	587	0	0.768	-0.380822
1743		3		F43D9.5	F43D9.5	387	126	261	337	145	192	406	174	232	0	1.125	0.169925
1744	Protein of unknown function	X	F44A6.3	F44A6.3	F44A6.3	231	122	109	180	177	3	216	213	3	0	36.333	5.18321
1745	Member of the Ser/Thr protein phosphatase protein family	3	F44B9.9	F44B9.9	F44B9.9	204	134	70	332	351	-19	400	422	-22	0
1746	Protein of unknown function	5	F44E7.9	F44E7.9	F44E7.9	723	136	587	689	392	297	830	472	358	0	1.64	0.713696
1747	Protein of unknown function	2	F44G4.6	F44G4.6	F44G4.6	508	136	372	559	383	176	673	461	212	0	1.755	0.811471
1748	Protein with low similarity to purine rich element binding protein beta (mouse Purb), which binds single-stranded DNA and mouse Pura, represses vascular smooth muscle alpha-actin transcription, and may act in DNA replication initiation and mRNP formation	4	F45E4.2	F45E4.2	F45E4.2	2357	139	2218	2092	294	1798	2520	354	2166	0	1.024	0.0342157
1749	Member of the mitochondrial carrier protein family of membrane transporters	4	T20D3.5	T20D3.5	T20D3.5	1020	135	885	997	165	832	1201	198	1003	0	0.882	-0.181149
1750	Putative ortholog of C. elegans F35F10.1 gene product	5	T20D4.13	T20D4.13	T20D4.13	594	133	461	834	151	683	1004	181	823	0	0.56	-0.836501
1751	Protein containing a DB module domain, has high similarity to uncharacterized C. elegans C56C10.4	3	T20G5.12	T20G5.12	T20G5.12	354	132	222	295	138	157	355	166	189	0	1.175	0.232661
1752	Putative 23 kDa subunit of NADH-coenzyme Q reductase, possible ortholog of human NDUFS8, 23 kDa subunit of NADH dehydrogenase (ubiquinone) Fe-S complex	3	T20H4.5	T20H4.5	T20H4.5	1252	148	1104	926	128	798	1115	154	961	0	1.149	0.200379
1753	Member of the matrixin family, which are extracellular matrix metalloproteases that may be involved in tissue remodeling, has a region of moderate similarity to a region of matrix metalloproteinase 28 (epilysin, human MMP28)	3	T21D11.1	T21D11.1	T21D11.1	434	160	274	392	132	260	472	159	313	0	0.875	-0.192645
1754	Protein of unknown function, has weak similarity to C. elegans ZC581.6	1	T21E12.3	T21E12.3	T21E12.3	264	149	115	304	131	173	366	157	209	0	0.55	-0.862496
1755	Protein of unknown function	5	T27E4.7	T27E4.7	T27E4.7	846	138	708	1136	131	1005	1368	157	1211	0	0.585	-0.773491
1756	Contains a baculovirus IAP repeat and is required for chromosome alignment, separation/segregation, and condensation	5	bir-1/T27F2.3	T27F2.3	0T27F2.3	375	143	232	349	135	214	420	162	258	0	0.899	-0.153607
1757	Member of the glutathione S-transferase protein family, has similarity to human and D. melanogaster glutathione S-transferases	5	T28A11.11	T28A11.11	8T28A11.11	389	151	238	300	140	160	361	168	193	0	1.233	0.302173
1758	Protein containing a DUF19 domain of unknown function, which contain twelve conserved cysteines, has strong similarity to uncharacterized C. elegans C17B7.9	5	T28A11.18	T28A11.18	T28A11.18	411	150	261	383	148	235	461	178	283	0	0.922	-0.117161
1759	Protein containing a DUF40 domain of unknown function, which contain four conserved cysteines, has strong similarity to uncharacterized C. elegans F35F10.9	5	T28A11.7	T28A11.7	3T28A11.7	257	145	112	230	149	81	277	179	98	0	1.143	0.192825
1760	Member of an uncharacterized protein family	3	T28A8.2	T28A8.2	2T28A8.2	289	164	125	433	155	278	521	186	335	0	0.373	-1.42275
1761	Protein of unknown function	X	F15A8.1	F15A8.1	F15A8.1	186	156	30	167	150	17	201	180	21	0	1.429	0.515006
1762	Member of an uncharacterized protein family	5	F15B9.1	F15B9.1	F15B9.1	1085	150	935	1150	146	1004	1385	175	1210	0	0.773	-0.37146
1763	Protein of unknown function, has weak similarity to C. elegans C33F10.8	4	F15E6.5	F15E6.5	F15E6.5	300	159	141	417	142	275	502	171	331	0	0.426	-1.23107
1764	Protein of unknown function	5	F16B4.7	F16B4.7	F16B4.7	9139	171	8968	2431	142	2289	2928	171	2757	0	3.253	1.70177
1765	Protein with strong similarity to C. elegans F18E3.5 gene product	5	F18E3.8	F18E3.8	F18E3.8	289	165	124	224	145	79	269	174	95	0	1.305	0.38405
1766	Protein of unknown function, has weak similarity to C. elegans F21D9.2	4	F19C7.5	F19C7.5	F19C7.5	284	149	135	374	151	223	450	181	269	0	0.502	-0.994241
1767	Member of the ribosomal protein S26 protein family	1	F39B2.6	F39B2.6	F39B2.6	1553	163	1390	1706	168	1538	2055	202	1853	0	0.75	-0.415037
1768	Protein of unknown function	5	F41E6.10	F41E6.10	F41E6.10	309	165	144	505	190	315	608	228	380	0	0.379	-1.39973
1769	Member of the Hsp20 or alpha crystallin family, has moderate similarity to C. elegans HSP-16, which is involved in the heat shock response	3	sip-1/F43D9.4	F43D9.4	F43D9.4	5289	134	5155	5118	196	4922	6166	236	5930	0	0.869	-0.202572
1770	Protein containing a major sperm protein (MSP) domain, which are involved in sperm motility, has very strong similarity to uncharacterized C. elegans F44D12.3	4	F44D12.7	F44D12.7	F44D12.7	405	136	269	2123	293	1830	2557	353	2204	0	0.122	-3.03505
1771	Protein with high similarity to ADP-ribosylation factor 1 (human ARF1), which is a small guanine nucleotide-binding protein, member of the ADP-ribosylation factor (ARF) family, which are GTP-binding proteins involved in protein trafficking	m	arl-6/F45E4.1	F45E4.1	F45E4.1	564	135	429	676	373	303	814	449	365	0	1.175	0.232661
1772	Protein with moderate similarity to C. elegans Y116F11.X gene product	2	F46F5.8	F46F5.8	F46F5.8	259	133	126	452	391	61	544	471	73	0	1.726	0.787432
1773	Member of the C. elegans Sre G protein-coupled chemoreceptor family, which are putative chemosensory receptors	5	C47A10.4	C47A10.4	C47A10.4	189	135	54	424	367	57	510	442	68	0	0.794	-0.332789
1774	Protein with high similarity to UDP-galactose-4-epimerase (human GALE), which catalyzes the interconversion of UDP galactose and UDP glucose in the galactose metabolic pathway, member of the NAD-dependent epimerase or dehydratase family	1	C47B2.6	C47B2.6	C47B2.6	1286	137	1149	1236	232	1004	1489	279	1210	0	0.95	-0.0740006
1775	Member of the galactosyltransferase family, which transfer galactose to GlcNAc termini of growing oligosaccharide chains, has a region of low similarity to a region of UDP-GlcNAc:betaGal beta-1-3-N-acetylglucosaminyltransferase 5 (human B3GNT5)	1	C47F8.5	C47F8.5	C47F8.5	340	137	203	417	149	268	502	179	323	0	0.628	-0.671164
1776	Aspartate-specific cysteine protease; involved in induction of apoptosis; similar to mammalian interleukin-1-beta-converting enzyme	4	ced-3/C48D1.2	C48D1.2	C48D1.2	289	139	150	360	145	215	433	174	259	0	0.579	-0.788365
1777	Protein containing a DUF23 domain of unknown function, has strong similarity to uncharacterized C. elegans ZK381.2	1	C49A1.5	C49A1.5	C49A1.5	300	138	162	230	140	90	277	168	109	0	1.486	0.571434
1778	Protein containing two DUF33 domains of unknown function	2	C49D10.5	C49D10.5	C49D10.5	420	142	278	386	131	255	465	157	308	0	0.903	-0.147202
1779	Protein containing a DHHC-type zinc finger (NEW1) domain, has a region of low similarity to a region of huntingtin interacting protein H (human HYPH), which interacts with human HD and this interaction may be altered in Huntington's disease	X	D2021.2	D2021.2	D2021.2	1854	152	1702	698	132	566	840	159	681	0	2.499	1.32135
1780	Member of the 2-hydroxychromene-2-carboxylate isomerase protein family, which are involved in prokaryotic polyaromatic hydrocarbon (PAH) catabolism, has low similarity to uncharacterized C. elegans ZK1320.1	4	D2024.7	D2024.7	D2024.7	819	142	677	704	134	570	848	161	687	0	0.985	-0.0218044
1781	Protein of unknown function	2	D2089.3	D2089.3	D2089.3	505	144	361	429	134	295	516	161	355	0	1.017	0.0243197
1782	Protein with moderate similarity to gamma-butyrobetaine hydroxylase (rat Bbox), which catalyzes the conversion of gamma butyrobetaine to carnitine	2	D2089.5	D2089.5	D2089.5	641	145	496	586	141	445	706	169	537	0	0.924	-0.114035
1783	Protein of unknown function	2	DH11.5	DH11.5	DH11.5	1199	136	1063	1165	144	1021	1403	173	1230	0	0.864	-0.210897
1784	Protein of unknown function	2	E01G4.4	E01G4.4	E01G4.4	1179	133	1046	905	143	762	1090	172	918	0	1.139	0.187768
1785	Protein with low similarity to solute carrier family 35 member 3 (UDP-N-acetylglucosamine(UDP-GlcNAc) transporter, human SLC35A3), which transports nucleotide sugars	4	M02B1.1	M02B1.1	M02B1.1	356	134	222	478	144	334	575	173	402	0	0.552	-0.85726
1786	Protein of unknown function, has moderate similarity to uncharacterized C. elegans F41H10.5	4	M02B1.3	M02B1.3	M02B1.3	776	143	633	766	145	621	922	174	748	0	0.846	-0.24127
1787		2		no_gene	M03A1.5	731	138	593	927	142	785	1116	171	945	0	0.628	-0.671164
1788	Protein containing two low-density lipoprotein (LDL) receptor class A domains and a chitin binding peritrophin-A domain, has a region of low similarity to a region of sortilin-related receptor (human SORL1), which is a mosaic receptor	5	M03E7.4	M03E7.4	M03E7.4	1234	151	1083	1248	145	1103	1503	174	1329	0	0.815	-0.295128
1789	Member of the G protein alpha subunit family	1	gpa-15/M04C7.1	M04C7.1	M04C7.1	3067	177	2890	585	150	435	704	180	524	-100	5.515	2.46336
1790	Protein of unknown function	1	M04F3.5	M04F3.5	M04F3.5	794	198	596	890	158	732	1072	190	882	0	0.676	-0.564905
1791	Protein of unknown function	3	R107.5	R107.5	R107.5	780	173	607	659	152	507	793	183	610	0	0.995	-0.00723157
1792	Protein with similarity to aminopeptidase	1	R119.2	R119.2	R119.2	213	137	76	257	145	112	309	174	135	0	0.563	-0.828793
1793	Member of the 7-transmembrane chemoreceptor family of G-protein coupled receptors (GPCR), has low similarity to C. elegans ODR-10, which is involved in odorant response	5	R11D1.6	R11D1.6	R11D1.6	528	149	379	567	162	405	683	195	488	0	0.777	-0.364013
1794	Protein containing a nuclear hormone receptor C4-type zinc finger domain, which bind DNA and may regulate transcription, and a nuclear hormone receptor ligand-binding domain, has weak similarity to hepatocyte nuclear factor 4 gamma (mouse Hnf4g)	4	R11E3.5	R11E3.5	R11E3.5	576	153	423	783	189	594	943	227	716	0	0.591	-0.75877
1795		5		multiple	R11G10.1	361	138	223	598	332	266	720	400	320	0	0.697	-0.520769
1796	Putative ortholog of C. elegans C25H3.8 gene product	2	R12C12.8	R12C12.8	R12C12.8	597	143	454	735	317	418	885	381	504	0	0.901	-0.150401
1797	Protein with strong similarity to C. elegans W04A8.4 gene product	5	Y43F8B.7	Y43F8B.7	Y43F8B.7	813	143	670	1191	344	847	1434	414	1020	0	0.657	-0.606035
1798	Protein of unknown function	5	Y43F8C.15	Y43F8C.15	Y43F8C.15	202	140	62	383	380	3	461	457	4	0	15.5	3.9542
1799		3		Y47D3B.6	Y47D3B.6	385	138	247	503	379	124	606	456	150	0	1.647	0.719841
1800	Protein with strong similarity to mouse Atp6a2, which is a vacuolar H+-ATPase alpha subunit that is involved in the maintenance of cytoplasmic pH, contains ATP synthase alpha or beta family beta-barrel, nucleotide-binding, and C-terminal domains	5	Y49A3A.2/Y49A3A.B	Y49A3A.2	Y49A3A.2	322	135	187	335	227	108	403	273	130	0	1.438	0.524064
1801		3		Y49E10.1	Y49E10.1	2239	139	2100	1726	159	1567	2079	191	1888	0	1.112	0.153157
1802		3		Y49E10.17	Y49E10.17	558	146	412	606	158	448	730	190	540	0	0.763	-0.390245
1803	Protein with moderate similarity to C. elegans F46A9.1 gene product	1	Y18D10A.21/Y18D10A.U	Y18D10A.21	Y18D10A.21	295	144	151	367	146	221	442	175	267	0	0.566	-0.821126
1804	Member of the sodium or hydrogen exchanger family, which maintain the pH of actively metabolizing cells, has a region of moderate similarity to a region of S. cerevisiae Nhx1p, which is a Na+/H+ antiporter required for endosomal protein trafficking	1	Y18D10A.6/Y18D10A.G	Y18D10A.6	Y18D10A.6	717	142	575	776	143	633	934	172	762	0	0.755	-0.405451
1805		2		Y38F1A.3	Y38F1A.3	1619	142	1477	1755	143	1612	2114	172	1942	0	0.761	-0.394032
1806		2		Y38F1A.9	Y38F1A.9	521	138	383	678	140	538	816	168	648	0	0.591	-0.75877
1807	Member of the rhodopsin family of G protein-coupled receptors (GPCR), has moderate similarity to muscarinic m3 acetylcholine receptor (human CHRM3), which is a G protein-coupled receptor that plays a variety of roles in the nervous system	5	Y40H4A.1/Y40H4A.A	Y40H4A.1	Y40H4A.1	479	141	338	449	142	307	540	171	369	0	0.916	-0.12658
1808	Protein of unknown function, has high similarity to uncharacterized C. elegans F07C4.5	4	Y40H7A.5/Y40H7.F	Y40H7A.5	Y40H7A.5	316	140	176	311	145	166	374	174	200	0	0.88	-0.184425
1809	Protein of unknown function, has weak similarity to uncharacterized C. elegans F18E3.5	5	F38E1.6	F38E1.6	F38E1.6#2	275	134	141	211	147	64	254	177	77	0	1.831	0.872632
1810	Protein of unknown function	4	F44D12.6	F44D12.6	F44D12.6#2	272	132	140	347	150	197	418	180	238	0	0.588	-0.766112
1811	Member of the aldehyde dehydrogenase protein family	2	F45H10.1	F45H10.1	F45H10.1#2	858	138	720	842	157	685	1014	189	825	0	0.873	-0.195946
1812	Protein of unknown function, has weak similarity to C. elegans T27B7.7	5	F48G7.4	F48G7.4	F48G7.4#2	639	147	492	589	160	429	709	192	517	0	0.952	-0.0709665
1813					F52B5.5#2	684	149	535	758	160	598	913	192	721	0	0.742	-0.430509
1814					F53C11.7#2	642	150	492	542	161	381	653	193	460	0	1.07	0.0976108
1815	Protein containing an F-box domain, which serve as a link between a target protein and a ubiquitin-conjugating enzyme, has high similarity to uncharacterized C. elegans F21D9.1	3	Y39A1A.16	Y39A1A.16	Y39A1A.16#2	239	157	82	323	158	165	389	190	199	0	0.412	-1.27928
1816	Protein of unknown function, has weak similarity to C. elegans Y71A12B.D	2	Y57G7A.8	Y57G7A.8	Y57G7A.8#2	415	159	256	480	158	322	578	190	388	-100	0.66	-0.599462
1817	Protein containing a nuclear hormone receptor ligand-binding and C4-type zinc finger domain, and a DUF 227 domain of unknown function, has a region of low similarity to a region of hepatocyte nuclear factor 4 gamma (human HNF4G)	5	ZK1037.4	ZK1037.4	ZK1037.4#2	245	156	89	244	152	92	293	183	110	-100	0.809	-0.305788
1818	Member of the domain of unknown function DUF13 family, has high similarity to uncharacterized C. elegans T15D6.8	X	ZK1086.3	ZK1086.3	ZK1086.3#2	262	138	124	334	149	185	402	179	223	-100	0.556	-0.846843
1819	Member of the 7-transmembrane chemoreceptor family of G-protein coupled receptors (GPCR), has high similarity to uncharacterized C. elegans ZK228.5	5	ZK228.6	ZK228.6	ZK228.6#2	404	135	269	438	156	282	527	187	340	0	0.791	-0.33825
1820	Protein with high similarity to C. elegans W09C3.6, which is a phosphatase involved in cell growth and maintenance, member of the serine or threonine protein phosphatase family	4	ZK354.9	ZK354.9	ZK354.9#2	298	148	150	416	209	207	501	251	250	0	0.6	-0.736966
1821	Protein of unknown function, has low similarity to uncharacterized autophagy 12-like (human APG12L)	3	B0336.8	B0336.8	B0336.8	603	131	472	742	369	373	893	444	449	0	1.051	0.0717627
1822		5		Y39B6B.bb	B0413.1	1845	132	1713	2213	232	1981	2666	279	2387	0	0.718	-0.477944
1823	Protein of unknown function	5	B0554.1	B0554.1	B0554.1	724	146	578	896	208	688	1079	250	829	0	0.697	-0.520769
1824	Protein with high similarity to ribosomal protein L14 (S. cerevisiae Rpl14ap), which binds RNA and is a structural ribosomal protein, member of the ribosomal L14e family, which are part of the large ribosomal subunit	1	C04F12.4	C04F12.4	C04F12.4	5627	156	5471	5558	367	5191	6696	442	6254	0	0.875	-0.192645
1825	Protein containing two protein kinase domains and two adenylate and guanylate cyclase catalytic domains, has moderate similarity to a region of natriuretic peptide receptor A (mouse Npr1), which is a membrane-bound guanylate cyclase	2	C04H5.4/C04H5.4A	C04H5.4	C04H5.4	266	144	122	270	388	-118	325	467	-142	0
1826	Protein of unknown function, has weak similarity to C. elegans C06E1.5	3	C06E1.2	C06E1.2	C06E1.2	281	134	147	336	332	4	404	400	4	0	36.75	5.19967
1827	Protein of unknown function	2	D1022.2	D1022.2	D1022.2	205	135	70	186	186		224	224		0
1828	Protein with high similarity to somatic cytochrome c (mouse Cycs), which is involved in mitochondrial respiration, contains a cytochrome c family heme-binding site domain	4	E04A4.7	E04A4.7	E04A4.7	2180	140	2040	2291	163	2128	2760	196	2564	0	0.796	-0.32916
1829	Member of an uncharacterized protein family	5	F08E10.7	F08E10.7	F08E10.7	273	138	135	225	159	66	271	191	80	0	1.688	0.755315
1830	Protein with high similarity to ribosomal protein L35a (rat Rpl35a), which is a component of the 60S ribosomal subunit that binds RNA, member of the ribosomal L35Ae family	2	F10E7.7	F10E7.7	F10E7.7	5283	145	5138	5877	167	5710	7080	201	6879	0	0.747	-0.42082
1831	Protein with moderate similarity to T-complex testis expressed 1 (rat Tctex1), which is a cytoplasmic dynein light chain that may play a role in vesicle targeting, spermatogenesis, and protein recruitment during cytokinesis	1	F13G3.4	F13G3.4	F13G3.4	1027	143	884	1100	167	933	1325	201	1124	0	0.786	-0.347399
1832	Protein with moderate similarity to C. elegans F17E9.4 gene product	4	F17E9.2	F17E9.2	F17E9.2	487	136	351	1111	162	949	1338	195	1143	0	0.307	-1.70369
1833	Protein of unknown function, has weak similarity to C. elegans T11A5.5	3	B0303.8	B0303.8	B0303.8	203	134	69	167	163	4	201	196	5	0	13.8	3.7866
1834	Protein with strong similarity to C. elegans Y19D10A.3 gene product	5	C01B4.2	C01B4.2	C01B4.2	235	135	100	339	162	177	408	195	213	0	0.469	-1.09234
1835	Member of the 7-transmembrane chemoreceptor family of G protein-coupled receptors (GPCR), has high similarity to uncharacterized C. elegans K02H11.3	5	C06B3.1	C06B3.1	C06B3.1	198	137	61	182	159	23	219	191	28	0	2.179	1.12367
1836	Member of the Hsp20 or alpha crystallin family, has moderate similarity to a region of alpha B crystallin (human CRYAB), which is a molecular chaperone that prevents protein aggregation in the lens and cardiac and skeletal muscle	3	C14B9.1/(hsp12.3)	C14B9.1	C14B9.1	1520	137	1383	1708	172	1536	2057	207	1850	0	0.748	-0.41889
1837	Protein containing glutathione S-transferase N-terminal and C-terminal domains, has low similarity to glutathione-S-transferase like (human GSTTLp28), which has thiol transferase and dehydroascorbate reductase activities and modulates ryanodine receptors	3	C29E4.7	C29E4.7	C29E4.7	1272	148	1124	1438	183	1255	1732	220	1512	0	0.743	-0.428566
1838	Protein of unknown function, has moderate similarity to uncharacterized human LOC51673	1	C32E8.3	C32E8.3	C32E8.3	1513	154	1359	1555	185	1370	1873	222	1651	0	0.823	-0.281036
1839	Protein with high similarity to poly A polymerase beta (mouse Papolb), which is a testis specific poly(A) polymerase that catalyzes the addition of polyadenosine to the 3' end of messenger RNAs	2	F43G6.5	F43G6.5	F43G6.5	490	156	334	474	184	290	571	221	350	0	0.954	-0.0679388
1840	Protein of unknown function	1	F56F4.4	F56F4.4	F56F4.4	660	152	508	933	178	755	1124	214	910	0	0.558	-0.841663
1841	Protein of unknown function, has low similarity to uncharacterized C. elegans C49C8.1	4	F56H11.6	F56H11.6	F56H11.6	1784	150	1634	3263	168	3095	3931	202	3729	0	0.438	-1.191
1842	Member of an uncharacterized protein family	5	F59D6.7	F59D6.7	F59D6.7	906	149	757	1223	160	1063	1473	192	1281	0	0.591	-0.75877
1843	Protein containing glutathione S-transferase N-terminal and C-terminal domains, has low similarity to prostaglandin D2 synthase (human PGDS), which is a prostaglandin D synthase and glutathione S-transferase that regulates non-rapid eye movement sleep	4	gst-2/CeGST2/K08F4.6	K08F4.6	K08F4.6	386	148	238	483	160	323	581	192	389	0	0.612	-0.708396
1844	Protein of unknown function	2	K10H10.4	K10H10.4	K10H10.4	346	144	202	459	158	301	553	190	363	0	0.556	-0.846843
1845	Protein of unknown function	1	C17D12.7	C17D12.7	C17D12.7	412	138	274	524	168	356	631	202	429	0	0.639	-0.646112
1846	Protein containing a homeobox (homeodomain) domain, has a region of low similarity to a region of C. elegans VAB-3, which is a homeodomain transcription factor required for morphogenesis of the head and gonads	X	C18B12.3	C18B12.3	C18B12.3	147	137	10	223	258	-35	268	310	-42	0
1847	Protein containing a GATA-type zinc finger domain, has low similarity to a region of C. elegans ELT-3, which is a GATA-binding factor required for hypodermal cell differentiation	5	C18G1.2	C18G1.2	C18G1.2	725	131	594	982	355	627	1183	427	756	0	0.786	-0.347399
1848	Protein containing an ETS domain, which bind promoter DNA, has a region of moderate similarity to a region of new Ets related factor 2 (E74-like factor 2) human ELF2, which is an ETS transcriptional activator	3	C24A1.2	C24A1.2	C24A1.2	414	126	288	681	329	352	820	396	424	0	0.679	-0.558517
1849		4		multiple	C25G4.8	243	140	103	457	336	121	550	404	146	0	0.705	-0.504305
1850	Protein of unknown function	X	C31H2.3	C31H2.3	C31H2.3	218	145	73	386	358	28	465	431	34	0	2.147	1.10232
1851	Putative ortholog of C. elegans F11D11.3 gene product	5	F11D11.4	F11D11.4	F11D11.4	326	137	189	538	366	172	648	440	208	0	0.909	-0.137648
1852	Protein containing two DUF148 domains of unknown function	4	F13E9.8	F13E9.8	F13E9.8	450	129	321	794	365	429	956	439	517	0	0.621	-0.687335
1853	Protein containing a DUF18 domain of unknown function, has high similarity to uncharacterized C. elegans F26D2.13	5	F16H6.3	F16H6.3	F16H6.3	470	126	344	699	317	382	842	381	461	0	0.746	-0.422752
1854		2		multiple	F18C5.6	415	128	287	592	197	395	713	237	476	0	0.603	-0.72977
1855	Protein containing two Src homology 3 (SH3) domains, which bind proline-rich peptides	4	F19C7.8	F19C7.8	F19C7.8	608	131	477	538	189	349	648	227	421	0	1.133	0.180148
1856	Homeodomain transcription factor, has similarity over the homeodomain to many human and D. melanogaster homeodomain transcription factors	4	ceh-19/pceh16-1/F20D12.6	F20D12.6	F20D12.6	265	136	129	376	200	176	453	240	213	0	0.606	-0.72261
1857		5		F10C2.1	F10C2.1	612	132	480	462	205	257	556	246	310	0	1.548	0.630405
1858	Protein of unknown function	X	F10D7.4	F10D7.4	F10D7.4	291	132	159	241	193	48	290	232	58	0	2.741	1.4547
1859		X		multiple	F12D9.1	277	131	146	262	188	74	315	226	89	0	1.64	0.713696
1860	Protein of unknown function	X	F13C5.5	F13C5.5	F13C5.5	639	133	506	684	212	472	824	255	569	0	0.889	-0.169745
1861	Putative ortholog of C. elegans F13C5.7 gene product	X	F13C5.6	F13C5.6	F13C5.7	374	140	234	311	210	101	374	253	121	0	1.934	0.951588
1862	Member of the malate or L-lactate dehydrogenase family, which are involved in sugar metabolism, has high similarity to uncharacterized C. elegans F36A2.3	2	VF13D12L.3/VF13D12L.C	VF13D12L.3	F13D12.1	1537	140	1397	1235	236	999	1487	284	1203	0	1.161	0.215368
1863	Protein containing a beta-ketoacyl synthase N-terminal domain, which are involved in dimer formation, has moderate similarity to a region of fatty acid synthase (rat Fasn), which is a multifunctional enzyme with beta-ketoacyl synthase and other activities	1	F32H2.6	F32H2.6	F32H2.6	330	149	181	378	238	140	455	286	169	0	1.071	0.0989585
1864	Protein with weak similarity to C. elegans hch-1 (Putative zinc-dependent metalloprotease, putative paralog of C. elegans K04E7.3, a member of the CUB domain protein family)	X	F33C8.4	F33C8.4	F33C8.4	607	143	464	914	234	680	1101	281	820	0	0.566	-0.821126
1865	Protein of unknown function	2	F35C5.12	F35C5.12	F35C5.12	396	141	255	537	221	316	646	266	380	0	0.671	-0.575615
1866	Protein containing a DUF19 domain of unknown function, which contain twelve conserved cysteines, has high similarity to uncharacterized C. elegans C04E12.5	5	F35F10.4	F35F10.4	F35F10.3	413	149	264	396	207	189	477	249	228	0	1.158	0.211635
1867	Protein of unknown function	4	F35G2.5	F35G2.5	F35G2.5	244	150	94	377	206	171	454	248	206	0	0.456	-1.13289
1868	Protein of unknown function	4	F35H10.3	F35H10.3	F35H10.3	460	155	305	514	200	314	619	240	379	0	0.805	-0.312939
1869	Protein of unknown function, has weak similarity to C. elegans Y4C6B.C	4	Y57G11B.2	Y57G11B.2	Y57G11B.2	277	152	125	397	192	205	478	231	247	0	0.506	-0.982791
1870	PKC alpha-binding protein	4	pick1-like/Y57G11C.22	Y57G11C.22	Y57G11C.22	779	151	628	1152	185	967	1387	222	1165	0	0.539	-0.891643
1871	Protein of unknown function	4	Y65A5A.2	Y65A5A.2	Y65A5A.2	272	142	130	322	177	145	387	213	174	0	0.747	-0.42082
1872	Protein with weak similarity to C. elegans Y69H2.J gene product	5	Y69H2.7/Y69H2.K	Y69H2.7	Y69H2.7	863	143	720	791	326	465	953	392	561	0	1.283	0.359521
1873		3		AF172090-1.Y75B8A	Y75B8A.2	359	131	228	531	346	185	639	416	223	0	1.022	0.0313952
1874	Protein of unknown function	3	Y75B8A.11/Y75B8A.O	Y75B8A.11	Y75B8A.11	238	127	111	445	353	92	536	425	111	0	1	0
1875	Protein with moderate similarity to C. elegans C08B6.5	X	ZK867.2	ZK867.2	ZK867.2	166	127	39	333	352	-19	401	424	-23	0
1876	Putative transcriptional repressor; required for normal programmed cell death	1	ces-2/ZK909.4	ZK909.4	ZK909.4	346	127	219	351	350	1	422	421	1	0	219	7.77479
1877	Protein containing a DX module domain	3	ZK1010.6	ZK1010.6	ZK1010.6	313	125	188	411	348	63	495	419	76	0	2.474	1.30685
1878	Member of the Hsp20 or alpha crystallin family	3	ZK1128.7	ZK1128.7	ZK1128.7	378	127	251	594	355	239	715	427	288	0	0.872	-0.1976
1879	LxDxamide neurotransmitter	2	nlp-11/ZK1320.10	ZK1320.10	ZK1320.10	945	125	820	850	351	499	1024	422	602	0	1.362	0.445727
1880	Protein of unknown function	1	F15D3.5	F15D3.5	F15D3.5	288	126	162	409	334	75	492	402	90	0	1.8	0.847997
1881	Putative ortholog of C. elegans Y5H2B.A gene product	5	Y5H2B.7	Y5H2B.7	Y5H2B.A	168	128	40	232	264	-32	279	318	-39	0
1882	Member of the cytochrome P450 family, has low similarity to cytochrome P450 subfamily 2J polypeptide 4 (rat Cyp2j4), which is a monooxygenase that converts arachidonic acid to hydroxyeicosatetraenoic and epoxyeicosatrienoic acids	5	C45H4.17	C45H4.17	Y5H2B.F	343	126	217	506	267	239	609	321	288	0	0.753	-0.409278
1883	Protein of unknown function, has moderate similarity to C. elegans Y6D1A.D	2	Y6D1A.1	Y6D1A.1	Y6D1A.C	703	127	576	750	267	483	903	321	582	0	0.99	-0.0144996
1884	Protein of unknown function, has strong similarity to C. elegans F47H4.6	4	Y9C9A.8	Y9C9A.8	Y9C9A_52.A	953	132	821	1189	268	921	1432	322	1110	0	0.74	-0.434403
1885	Putative paralog of C. elegans F02H6.5	4	Y9C9A.16	Y9C9A.16	Y9C9A_54.A	390	134	256	349	314	35	420	378	42	0	6.095	2.60763
1886	Protein of unknown function, putative paralog of C. elegans Y40B10B.B	4	Y9C9A.1	Y9C9A.1	Y9C9A_54.I	646	135	511	534	333	201	643	401	242	0	2.112	1.07861
1887	Protein with a region of low similarity to a region of monocarboxylate cotransporter 2, (rat Slc16a7), which mediates the transport of lactate and pyruvate across plasma membranes	5	Y19D10A.12/Y19D10A.E	Y19D10A.12	Y19D10A.	707	135	572	1183	329	854	1425	396	1029	0	0.556	-0.846843
1888	Member of the aldose 1-epimerase family, which interconvert aldoses between their alpha- and beta-forms, has a region of low similarity to a region of S. cerevisiae Gal10p, which is an UDP-glucose 4-epimerase that catalyzes a step in galactose metabolism	5	Y19D10A.4/Y19D10A.N	Y19D10A.4	Y19D10A.N	656	137	519	629	316	313	757	380	377	0	1.377	0.461529
1889	Protein of unknown function	4	Y24D9A.7/Y24D9A_29.A	Y24D9A.7	Y24D9A.A	345	138	207	527	298	229	634	359	275	0	0.753	-0.409278
1890	Protein of unknown function	4	Y24D9A.5/Y24D9A_29.C	Y24D9A.5	Y24D9A.C	1115	133	982	1493	290	1203	1798	349	1449	0	0.678	-0.560643
1891	Putative ortholog of C. elegans Y24D9A_29.G gene product	4	Y24D9A.2	Y24D9A.2	Y24D9A.G	284	136	148	355	287	68	427	345	82	0	1.805	0.851999
1892	Protein with weak similarity to H. sapiens Hs.5881 (Human ELL mRNA, complete cds)	4	Y24D9A.1/Y24D9A_29.I	Y24D9A.1	Y24D9A.I	2107	154	1953	2109	325	1784	2540	391	2149	0	0.909	-0.137648
1893		4		no_gene	Y55F3A_747.A	298	161	137	355	342	13	427	412	15	0	9.133	3.19109
1894	Protein with weak similarity to C. elegans unc-89, a muscle cell protein of the immunoglobulin-like protein family that is required for coordinated locomotion	4	Y55F3AM.13	Y55F3AM.13	Y55F3A_748.B	1313	162	1151	1246	334	912	1501	402	1099	0	1.047	0.0662614
1895	Possible mitochondrial ribosomal small subunit protein	4	Y55F3AM.1	Y55F3AM.1	Y55F3A_748.G	1235	177	1058	1095	355	740	1319	427	892	0	1.186	0.246104
1896	Putative ortholog of C. elegans F30H5.3 gene product	4	Y55F3BR.3/Y55F3BR.J	Y55F3BR.3	Y55F3A_749.A	274	165	109	330	352	-22	397	424	-27	0
1897		4		Y55F3C.8	Y55F3C.B	332	156	176	400	359	41	481	432	49	0	3.592	1.84479
1898		4		Y55F3C.5	Y55F3C.D	192	152	40	246	370	-124	296	445	-149	0
1899	Putative paralog of C. elegans Y59E9AR.3	4	Y59E9AR.5	Y59E9AR.5	Y59E9_120.A	183	124	59	343	347	-4	413	418	-5	0
1900	Protein with strong similarity to C. elegans msp-51	4	Y59E9AR.7	Y59E9AR.7	Y59E9_120.C	358	128	230	2322	361	1961	2797	434	2363	0	0.097	-3.36587
1901		n		no_gene	Y60A9A.A	325	125	200	679	356	323	818	428	390	0	0.513	-0.962969
1902	Protein of Unknown function	5	Y61A9LA.8	Y61A9LA.8	Y61A9LA_68.A	1195	126	1069	1422	347	1075	1713	418	1295	0	0.825	-0.277534
1903		5		Y61A9LA.3	Y61A9LA_69.B	560	130	430	684	349	335	824	420	404	0	1.064	0.0894982
1904		5		Y61A9LA.3	Y61A9LA_71.A	673	136	537	721	353	368	868	425	443	0	1.212	0.27739
1905		4		Y105C5A.5	Y105C5A.D	266	134	132	474	351	123	571	422	149	0	0.886	-0.174621
1906		m		Y105C5A.7	Y105C5A.F	402	129	273	379	350	29	456	421	35	0	7.8	2.96347
1907		4		Y105C5A.12	Y105C5A.K	657	134	523	1139	353	786	1372	425	947	0	0.552	-0.85726
1908	Protein of unknown function, putative paralog of C. elegans Y105C5.N	4	Y105C5A.14	Y105C5A.14	Y105C5A.M	804	136	668	1088	362	726	1310	436	874	0	0.764	-0.388355
1909		4		no_gene	Y105C5A.Q	335	135	200	422	371	51	508	446	62	0	3.226	1.68975
1910		1		Y105E8A.oo	Y105E8A.E	335	139	196	754	364	390	908	438	470	0	0.417	-1.26188
1911	Putative ortholog of C. elegans B0035.6 gene product	3	Y111B2A.3	Y111B2A.3	Y111B2A.B	1031	143	888	818	366	452	985	440	545	0	1.629	0.703987
1912	Protein containing a DUF41 domain of unknown function, has high similarity to uncharacterized C. elegans ZC482.3	3	ZC482.2	ZC482.2	Y111B2B.B	257	142	115	491	376	115	591	453	138	0	0.833	-0.263612
1913		3		no_gene	Y111B2C.C	699	136	563	1117	392	725	1345	472	873	0	0.645	-0.632629
1914		3		no_gene	Y111B2D.D	328	137	191	511	393	118	615	473	142	0	1.345	0.427606
1915	Putative ortholog of C. elegans Y111B2D.f gene product	3	Y111B2A.18	Y111B2A.18	Y111B2D.H	4148	148	4000	2447	387	2060	2948	466	2482	0	1.612	0.688852
1916	Protein of unknown function	5	F55C9.5	F55C9.5	Y116F11A.B	278	166	112	498	394	104	600	474	126	0	0.889	-0.169745
1917	Protein with moderate similarity to C. elegans Y54G2A.13 gene product	4	Y69A2AR.9/Y69A2AR.Y	Y69A2AR.9	Y69A2A_7278.B	201	160	41	394	391	3	474	471	3	0	13.667	3.77262
1918	Putative paralog of C. elegans F58G6.4	3	Y71D11A.5	Y71D11A.5	Y71D11A.A	327	162	165	528	392	136	636	472	164	0	1.006	0.00863031
1919		1		Y71F9B.5	Y71F9B_299.B	475	161	314	756	391	365	910	471	439	0	0.715	-0.483985
1920	Protein of unknown function	1	Y71G12B.9	Y71G12B.9	Y71G12A_201.B	677	162	515	924	394	530	1113	474	639	0	0.806	-0.311148
1921	Protein of unknown function	1	Y71G12B.7/Y71G12B.BB	Y71G12B.7	Y71G12A_203.D	410	170	240	595	395	200	716	475	241	0	0.996	-0.00578235
1922	Putative ortholog of C. elegans Y54F10AR.1 gene product	1	Y71G12B.17	Y71G12B.17	Y71G12A_205.C	490	163	327	688	392	296	828	472	356	0	0.919	-0.121863
1923		1		Y105E8A.mm	Y105E8A.C	423	159	264	695	386	309	837	465	372	0	0.71	-0.494109
1924		1		Y105E8A.w	Y105E8C.D	539	154	385	688	373	315	828	449	379	0	1.016	0.0229004
1925		1		Y105E8A.m	Y105E8C.N	853	122	731	863	341	522	1039	410	629	0	1.162	0.21661
1926		1		Y105E8A.h	Y105E8C.S	477	130	347	536	358	178	645	431	214	0	1.621	0.696884
1927		1		Y105E8A.cc	Y105E8D.A	311	128	183	539	346	193	649	416	233	0	0.785	-0.349235
1928		1		Y105E8A.ff	Y105E8D.E	371	128	243	543	337	206	654	406	248	0	0.98	-0.0291463
1929	Protein of unknown function	2	F43C11.6	F43C11.6	F43C11_37.D	745	138	607	793	344	449	955	414	541	0	1.122	0.166073
1930	Putative ortholog of C. elegans F54A3.G gene product	2	F54A3.2	F54A3.2	F54A3_31.F	364	143	221	741	349	392	892	420	472	0	0.468	-1.09542
1931	Putative paralog of C. elegans F56A4.11	5	F56A4.12	F56A4.12	F56A4.A	402	136	266	567	355	212	683	427	256	0	1.039	0.0551957
1932	Protein with weak similarity to C. elegans W08F4.10 gene product	X	T13G4.5	T13G4.5	T13G4.C	239	129	110	400	354	46	481	426	55	0	2	1
1933	Putative ortholog of C. elegans F31F4.17 gene product	5	Y5H2B.1	Y5H2B.1	Y5H2B.I	507	134	373	745	366	379	897	440	457	0	0.816	-0.293359
1934		4		multiple	Y17G9A.F	224	135	89	442	383	59	532	461	71	0	1.254	0.326537
1935		4		Y69A2AR.29	Y69A2A_7278.I	398	134	264	734	385	349	884	463	421	0	0.627	-0.673463
1936	Protein with weak similarity to C. elegans F23H12.5 gene product	1	Y73E7A.8	Y73E7A.8	Y71G12A_205.A	471	133	338	794	375	419	956	451	505	0	0.669	-0.579922
1937		4		multiple	Y73F8A.M	218	135	83	625	371	254	753	446	307	0	0.27	-1.88897
1938	Protein with weak similarity to C. elegans T23H4.2 (Member of the nuclear hormone receptor/Zinc finger protein family)	4	Y77E11A.5	Y77E11A.5	Y77E11A_3443.A	363	135	228	670	380	290	807	457	350	0	0.651	-0.619271
1939		1		Y34D9B.1	Y95B8A_85.A	712	135	577	1041	392	649	1254	472	782	0	0.738	-0.438307
1940		2		multiple	Y110A2A_54.	222	135	87	387	399	-12	466	480	-14	0
1941	Protein with strong similarity to C. elegans ZK546.4	4	Y40C5A.3	Y40C5A.3	Y40C5A.G	469	144	325	596	398	198	718	479	239	0	1.36	0.443607
1942	Protein with moderate similarity to C. elegans K09F5.5 gene product	4	Y41D4B.12/Y41D4B.Q	Y41D4B.12	Y41D4A_2615.A	467	162	305	793	400	393	955	481	474	0	0.643	-0.637109
1943	Putative ortholog of C. elegans Y41D4B.F gene product	4	Y41D4B.19	Y41D4B.19	Y41D4A_3073.B	416	159	257	664	405	259	800	487	313	0	0.821	-0.284546
1944		4		multiple	Y41D4A_3457.B	830	149	681	1156	405	751	1392	487	905	0	0.752	-0.411195
1945	Putative ortholog of C. elegans Y41D4B.F gene product	4	Y41D4B.19	Y41D4B.19	Y41D4A_3457.D	475	155	320	545	402	143	656	484	172	0	1.86	0.895303
1946	Protein with strong similarity to C. elegans T11F9.1 gene product	4	Y41D4B.24/Y41D4B.A	Y41D4B.24	Y41D4B_3805.B	317	162	155	676	392	284	814	472	342	0	0.453	-1.14242
1947	Protein of unknown function	2	Y48C3A.5	Y48C3A.5	Y48C3A.C	355	153	202	699	382	317	842	460	382	0	0.529	-0.91866
1948	Protein with weak similarity to S. cerevisiae FLO8 (Putative transcriptional activator of FLO1, required for diploid filamentous growth)	2	Y48C3A.8/Y48C3A.J	Y48C3A.8	Y48C3A.J	800	151	649	779	385	394	938	463	475	0	1.366	0.449957
1949	Protein with moderate similarity to C. elegans F57B7.1	2	Y48C3A.11	Y48C3A.11	Y48C3A.M	346	157	189	536	379	157	645	456	189	0	1	0
1950	Protein containing SVPGVLRF-amide neuromodulator	X	flp-18/FaRP_I/Y48D7A.2	Y48D7A.2	Y48D7A.A	659	151	508	665	381	284	801	459	342	0	1.485	0.570463
1951	Putative ortholog of C. elegans Y48G1BL.H gene product	1	Y48G1BL.1	Y48G1BL.1	Y48G1C_55.F	465	126	339	564	334	230	679	402	277	0	1.224	0.291604
1952		1		Y48G8AL.13	Y48G8A_3051.A	746	142	604	938	346	592	1130	416	714	0	0.846	-0.24127
1953		?		no_gene	NL4L	687	142	545	1759	342	1417	2119	412	1707	0	0.319	-1.64837
1954	Member of the ATP synthase A chain family	?	ATP6/ATPase6	ATP6	ATP6	1214	141	1073	2713	342	2371	3268	412	2856	0	0.376	-1.4112
1955		?		CYTB	CYTB	438	141	297	1031	367	664	1242	442	800	0	0.371	-1.43051
1956	Member of the NADH-Ubiquinone or plastoquinone (complex I) family, which catalyze transfer of two electrons from NADH to ubiquinone, has low similarity to mitochondrial NADH dehydrogenase 4 (human MTND4), which is a NADH-ubiquinone oxidoreductase subunit	?	ND4/NU4M	ND4	ND4	3406	144	3262	6002	365	5637	7231	439	6792	0	0.48	-1.05889
1957		?		COII	COII	4907	145	4762	10887	366	10521	13116	440	12676	0	0.376	-1.4112
1958	Member of the NADH-Ubiquinone or plastoquinone (complex I) family, which catalyze transfer of two electrons from NADH to ubiquinone, has a region of moderate similarity to a region of NADH dehydrogenase subunit 5 (human MTND5)	?	ND5/NU5M	ND5	ND5	441	146	295	660	385	275	795	463	332	0	0.889	-0.169745
1959					EMPTY	376	137	239	992	380	612	1195	457	738	0	0.324	-1.62593
1960					EMPTY	384	131	253	1036	377	659	1248	454	794	0	0.319	-1.64837
1961					EMPTY	212	128	84	548	373	175	660	449	211	0	0.398	-1.32916
1962					EMPTY	218	127	91	695	377	318	837	454	383	0	0.238	-2.07097
1963					EMPTY	219	124	95	654	379	275	787	456	331	0	0.287	-1.80088
1964					EMPTY	211	127	84	672	385	287	809	463	346	0	0.243	-2.04097
1965	Member of an uncharacterized protein family	2	K09F6.7	K09F6.7	K09F6.7#2	294	127	167	556	392	164	669	472	197	0	0.848	-0.237864
1966	Protein of unknown function containing a Ground-like domain, has moderate similarity to C. elegans F42C5.7	X	K10C2.5	K10C2.5	K10C2.5#2	230	138	92	362	403	-41	436	485	-49	0
1967	Protein containing two DUF38 domains of unknown function and an F-box domain, which serve as a link between a target protein and a ubiquitin-conjugating enzyme, has weak similarity to uncharacterized C. elegans T06E6.5	5	K10G4.1	K10G4.1	K10G4.1#2	192	150	42	303	405	-102	365	487	-122	0
1968		4		R11A8.4	R11A8.4#2	351	147	204	727	397	330	875	478	397	0	0.514	-0.96016
1969	Protein with high similarity to glycine dehydrogenase (P-protein) (human GLDC), which catalyzes the decarboxylation of glycine and is associated with nonketotic hyperglycinemia, member of the glycine cleavage P-protein family	2	R12C12.1	R12C12.1	R12C12.1#2	585	148	437	998	407	591	1202	490	712	0	0.614	-0.703689
1970	Serine/threonine protein phosphatase	3	R13A5.11	R13A5.11	R13A5.11#2	442	150	292	952	409	543	1146	492	654	0	0.446	-1.16488
1971	Cytoplasmic zinc-finger protein involved in regulation of early morphogenesis	5	pos-1/F52E1.1	F52E1.1	F52E1.1#2	1890	176	1714	1795	419	1376	2162	504	1658	0	1.034	0.0482362
1972	Protein of unknown function, has moderate similarity to uncharacterized C. elegans C12D5.9	5	R13D7.2	R13D7.2	R13D7.2#2	460	212	248	856	430	426	1031	518	513	0	0.483	-1.0499
1973	Protein with low similarity to S. cerevisiae Muc1p, which is a cell surface flocculin required for invasive and pseudohyphal growth	5	ZC178.2	ZC178.2	ZC178.2#2	449	168	281	830	408	422	1000	491	509	0	0.552	-0.85726
1974	Protein of unknown function	2	C09H10.8	C09H10.8	C09H10.8#2	350	160	190	481	388	93	579	467	112	0	1.696	0.762136
1975	Protein containing a lipopolysaccharide-binding protein, bactericidal permeability-increasing protein, or cholesteryl ester transfer protein C-terminal domain	5	ZC513.1	ZC513.1	ZC513.1#2	240	158	82	343	380	-37	413	457	-44	0
1976	Member of the rhodopsin family of G protein-coupled receptors (GPCR), has low similarity to uncharacterized C. elegans C48C5.3	X	C25B8.5	C25B8.5	C25B8.5#2	205	148	57	330	377	-47	397	454	-57	0
1977	Protein containing two helix-loop-helix DNA-binding domains, which mediate protein dimerization, has a region of low similarity to a region of transcription factor AP4 (human TFAP4), which is a transcriptional coactivator and repressor	3	F58A4.7/F48A4.7	F58A4.7	F58A4.7#2	1719	130	1589	2098	336	1762	2527	404	2123	0	0.748	-0.41889
1978	Protein of unknown function	4	F58H7.1	F58H7.1	F58H7.1#2	229	133	96	310	345	-35	373	415	-42	0
1979	Required, possibly maternally for centrosome separation and possibly duplication	2	zyg-1/F59E12.2	F59E12.2	F59E12.2#2	848	128	720	946	339	607	1139	408	731	0	0.985	-0.0218044
1980	G protein-coupled receptor of unknown function; has similarity to C. elegans H05B21.3 and H05B21.4, has weak similarity to human proteinase-activated receptor	5	H27D07.2	H27D07.2	H27D07.2#2	197	131	66	324	344	-20	390	414	-24	0
1981	Putative paralog of C. elegans K02B9.1 which encodes a putative isocitrate lyase	X	K02B9.2	K02B9.2	K02B9.2#2	396	135	261	374	355	19	450	427	23	0	11.348	3.50437
1982	Histone H4 in the HIS3 gene cluster	X	his-10/his-38/K03A1.6	K03A1.6	K03A1.6#2	960	140	820	911	354	557	1097	426	671	0	1.222	0.289244
1983	Protein of unknown function	X	T01B6.4	T01B6.4	T01B6.4#2	264	140	124	399	361	38	480	434	46	0	2.696	1.43082
1984	Protein of unknown function	X	T03G6.1	T03G6.1	T03G6.1#2	449	134	315	833	369	464	1003	444	559	0	0.564	-0.826233
1985	Member of the short-chain dehydrogenase-reductase family, which are NAD- or NADP-dependent oxidoreductases, has high similarity to uncharacterized C. elegans K08F4.9	4	T04B2.1	T04B2.1	T04B2.1#2	325	132	193	541	371	170	651	446	205	0	0.941	-0.0877334
1986	Protein containing an F-box domain, which serve as a link between a target protein and a ubiquitin-conjugating enzyme, has high similarity to uncharacterized C. elegans T27A1.2	2	T04B8.2	T04B8.2	T04B8.2#2	219	128	91	431	371	60	519	446	73	0	1.247	0.318461
1987	Putative coiled-coil protein, has weak similarity to myosin heavy chains and human centromere proteins CENPE and CENPF	5	T04F3.1	T04F3.1	T04F3.1#2	1469	130	1339	1505	374	1131	1813	450	1363	0	0.982	-0.0262051
1988	Protein of unknown function	2	T05A8.6	T05A8.6	T05A8.6#2	191	132	59	323	379	-56	389	456	-67	0
1989	Protein with strong similarity to C. elegans B0457.4 gene product	4	C04G2.5	C04G2.5	C04G2.5#2	171	133	38	329	382	-53	396	460	-64	0
1990	Protein of unknown function, has strong similarity to uncharacterized C. elegans C10G11.9	4	C04G2.8	C04G2.8	C04G2.8#2	673	136	537	2392	395	1997	2881	475	2406	0	0.223	-2.16488
1991	Protein of unknown function, has a region of low similarity to a region of germ cell-specific gene 2 (haspin, mouse Gsg2), which is a serine-threonine kinase that binds DNA and may play roles in cell cycle cessation and haploid germ cell differentiation	4	C04G2.10	C04G2.10	C04G2.10#2	271	136	135	387	404	-17	466	486	-20	0
1992	Protein with high similarity to solute carrier family 25 member 4 (mouse Slc25a4), which is an adenine nucleotide translocator required for metabolism that can induce apoptosis, member of the mitochondrial carrier protein family of membrane transporters	4	C47E12.2	C47E12.2	C47E12.2#2	867	147	720	1175	415	760	1415	500	915	0	0.787	-0.345564
1993	Protein with high similarity to S. cerevisiae Ipp1p, which is a cytoplasmic inorganic pyrophosphatase, member of the inorganic pyrophosphatase family, which catalyze hydrolysis of pyrophosphate formed as product of biosynthetic reactions utilizing ATP	4	C47E12.4	C47E12.4	C47E12.4	2035	181	1854	2172	451	1721	2616	543	2073	0	0.894	-0.161653
1994	Protein with strong similarity to C. elegans K09B11.10 gene product	4	C47E12.6	C47E12.6	C47E12.6#2	274	196	78	460	436	24	554	525	29	0	2.69	1.42761
1995	Protein of unknown function	4	T04B2.3	T04B2.3	T04B2.3#2	395	167	228	671	422	249	808	508	300	0	0.76	-0.395929
1996	Member of the short-chain dehydrogenase-reductase family, which are NAD- or NADP-dependent oxidoreductases, has low similarity to a region of 17 beta-hydroxysteroid dehydrogenase type 2 (mouse Hsd17b2)	4	T04B2.6	T04B2.6	T04B2.6#2	462	162	300	519	412	107	625	496	129	0	2.326	1.21785
1997	Protein containing eight BRCA1 (breast cancer type 1) C terminus (BRCT) domains, which are found in some cell cycle checkpoint proteins	4	T13F2.3	T13F2.3	T13F2.3#2	776	178	598	763	410	353	919	493	426	0	1.404	0.489543
1998	Protein of unknown function	4	T13F2.7	T13F2.7	T13F2.7	902	212	690	819	432	387	986	520	466	0	1.481	0.566572
1999	Member of a protein family	4	T13F2.9	T13F2.9	T13F2.9#2	429	181	248	2085	415	1670	2512	500	2012	0	0.123	-3.02327
2000	Protein containing a clathrin-associated adaptin N-terminal domain, which are components of coated vesicles, has moderate similarity to S. cerevisiae Sec21p, which is a coatomer (COPI) complex gamma chain (gamma-COP) of secretory pathway vesicles	4	T14G10.5	T14G10.5	T14G10.5#2	1108	171	937	1022	401	621	1231	483	748	0	1.253	0.325386
2001					COLIBACTER2	232	178	54	442	406	36	532	489	43	0	1.256	0.328836
2002					COLIBACTER4	170	151	19	308	379	-71	371	456	-85	0
2003					COLIBACTER6	164	126	38	326	330	-4	392	397	-5	0
2004					COLIBACTER8	187	121	66	531	328	203	639	395	244	0	0.27	-1.88897
2005					COLIBACTER10	206	120	86	476	328	148	573	395	178	0	0.483	-1.0499
2006					COLIBACTER12	206	123	83	442	336	106	532	404	128	0	0.648	-0.625934
2007					COLIBACTER50	185	121	64	379	337	42	456	406	50	0	1.28	0.356144
[truncated: 19,505 more rows]
